# Supplementary material
Source: PubMed Central journal article supplement (PMC6478393)
Supplement: NIHMS1523727-supplement-Supplement1.pdf [file NIHMS1523727-supplement-Supplement1.pdf]

## Supplementary Appendix

This appendix has been provided by the authors to give readers additional information about their work.

Supplement to: The PREVAIL III Study Group. A longitudinal study of Ebola sequelae in Liberia. *N Engl J Med* 2019;380:924-34. DOI: 10.1056/NEJMoa1805435

## Table of Contents

|                                                                                                                             |           |
|-----------------------------------------------------------------------------------------------------------------------------|-----------|
| <b>Table of Contents .....</b>                                                                                              | <b>2</b>  |
| <b>Acknowledgements .....</b>                                                                                               | <b>3</b>  |
| <b>Contributions to the Design, Conduct and Reporting of the PREVAIL III study .....</b>                                    | <b>4</b>  |
| <b>1 SUPPLEMENTARY METHODS .....</b>                                                                                        | <b>5</b>  |
| 1.1 Baseline Data Collection .....                                                                                          | 5         |
| 1.2 Measurement of Antibody Responses to Ebola Glycoprotein .....                                                           | 6         |
| 1.3 Ophthalmic Evaluation.....                                                                                              | 8         |
| 1.4 Semen Collection .....                                                                                                  | 9         |
| 1.5 Statistical Methods .....                                                                                               | 9         |
| <b>2 SUPPLEMENTARY RESULTS.....</b>                                                                                         | <b>11</b> |
| 2.1 Characteristics of Antibody Positive and Antibody Negative Survivors and Close<br>Contacts .....                        | 11        |
| 2.2 Demographic and Baseline Clinical Findings of Antibody Positive Survivors and<br>Antibody Negative Close Contacts ..... | 13        |
| 2.3 Clinical Findings at Follow-up Visits .....                                                                             | 13        |
| 2.4 Ophthalmologic Findings.....                                                                                            | 14        |
| 2.5 Association of Baseline Antibody Levels with Symptoms and Examination<br>Findings .....                                 | 14        |
| 2.6 Correlations of Viral RNA Semen with Examination Findings and Antibody Levels<br>.....                                  | 15        |
| <b>3 SUPPLEMENTARY FIGURES AND TABLES.....</b>                                                                              | <b>17</b> |
| 3.1 Figure S1 .....                                                                                                         | 17        |
| 3.2 Figure S2 .....                                                                                                         | 18        |
| 3.3 Figure S3 .....                                                                                                         | 19        |
| 3.4 Table S1.....                                                                                                           | 20        |
| 3.5 Table S2.....                                                                                                           | 20        |
| 3.6 Table S3.....                                                                                                           | 21        |
| 3.7 Table S4.....                                                                                                           | 22        |
| 3.8 Table S5.....                                                                                                           | 23        |
| 3.9 Table S6.....                                                                                                           | 24        |
| 3.10 Table S7.....                                                                                                          | 25        |
| 3.11 Table S8.....                                                                                                          | 26        |
| 3.12 Table S9.....                                                                                                          | 27        |
| <b>4 CASE REPORT FORMS .....</b>                                                                                            | <b>28</b> |
| <b>5 REFERENCES .....</b>                                                                                                   | <b>73</b> |

## **Acknowledgements**

We would like to thank the PREVAIL III participants without whom this work would not have been possible. In addition to the writing group, the following other members of the PREVAIL III Study Group contributed to the conduct of this study.

**Liberian Investigators and Staff** Bolay F, Flumo H, Glaweon M, Mangou DB, Stewart J, Taryor V

**NIH Investigators and Staff** Billioux B, Doepel L, Eckes R, Foster G, Herpin B, Kaler S, McNay L, Pierson J, Smith B, Smolskis M, Tierney J, Vogel S

**Leidos Biomedical Investigators and Staff** Albert S, Barrington K, Baseler B, Bility K, Boison P, Doe-Anderson J, Edeline M, Kiawu H, Kynvin K, Lambert L, Mendizabal J, Nyenlekewoi L, Poole H, Randunu N, Shelley D, Simpson S, Soh Njoh W, Walker K

**Advanced Biomedical Laboratories Investigators and Staff** Hoover M, McCullough J

**The Mitchell Group Investigators and Staff** Bruce W, Ross R

**University of Minnesota Investigators and Staff** Brekke K, Davis B, DuChene A, Engen N, George M, Harrison M, Quan K, Quan S-F, Nelson C, Renken C, Thompson G, Wentworth D

### **Contributions to the Design, Conduct and Reporting of the PREVAIL III study**

The first draft of the manuscript was prepared by M.C. Sneller, C. Reilly, M.P. Fallah, H.C. Lane and J.D. Neaton. The study was designed by H.C. Lane, M.C. Sneller, M.P. Fallah and J.D. Neaton. The PREVAIL III team, led by M. Badio and Drs. S. Moses, D. Gayedyu-Dennis, K. Johnson, R.J. Bishop and A.O. Eghrari obtained the data. Testing for Ebola RNA and immunogenicity testing was conducted by L.E. Hensley, K. Tuznik, J. Varughese, K. Jensen, and B. Dighero-Kemp. Data analysis was carried out by C. Reilly. All authors reviewed drafts of the manuscript. The writing group vouches for the data and analyses. The decision to publish these results was made by M.C. Sneller, C. Reilly, M.P. Fallah, J.D. Neaton and H.C. Lane.

There were no agreements concerning confidentiality of the data between the sponsor and the authors or the institutions named in the credit line.

## **1 SUPPLEMENTARY METHODS**

PREVAIL III was designed and is being carried out by the Partnership for Research on Ebola Virus in Liberia, a Liberian-U.S. consortium that was formed by the two countries in the midst of the Ebola public health crisis to carry out a program of urgently needed clinical research.

Among the other studies conducted and reported by the partnership are PREVAIL I, a randomized phase 2 trial of two vaccines to prevent EVD<sup>1</sup>, and PREVAIL II, a randomized trial of investigational therapeutics in patients with acute EVD in collaboration with the governments of Sierra Leone and Guinea<sup>2</sup>.

### **1.1 Baseline Data Collection**

The 3 sites used for participant recruitment were John F. Kennedy (JFK) Medical Center, Duport Road Clinic (both in Monrovia), and CH Rennie Hospital (a more rural site about 70 km from Monrovia). Following informed consent, survivors and close contacts received a comprehensive medical examination that included the collection of demographic information, a medical history, collection of symptoms, a physical examination, an eye screen that led to an ophthalmologic examination for most participants, and the measurement of serum chemistries and hematology. In addition to these ophthalmological exams (described more fully in Section 1.3), there were also specialized neurologic assessments on a subset of participants and a birth cohort sub-study evaluating pregnancy outcomes in female survivors. Semen, cerebrospinal fluid, breast milk, vaginal fluid, placenta, and cord blood were tested for the presence of Ebola viral RNA in subsets of participants.

For EVD survivors, information about their Ebola infection, including likely source of infection, symptoms at diagnosis, and dates in the ETU were obtained. For close contacts, the nature of contact with the survivor, and their relationship to the survivor was assessed along with any symptoms the contact may have experienced within 3 weeks of the survivor's illness. Data on the use of condoms was collected on sexual contacts of survivors and survivors.

## **1.2 Measurement of Antibody Responses to Ebola Glycoprotein**

IgG antibody levels against the Ebola surface glycoprotein were measured in serum collected at the baseline examination for survivors and close contacts using the Filovirus Animal Nonclinical Group (FANG) assay. Briefly, 96-well microtiter plates were coated with recombinant EBOV GP produced in Human Embryonic Kidney 293 cells (HEK293, Battelle Memorial Institute (BMI), Columbus, OH/Joint Vaccine Acquisition Program (JVAP), Fort Detrick, MD) diluted in PBS overnight at 4°C. An 11-point standard curve was created by diluting a reference standard (lot number BMIZAIRE102, Battelle Memorial Institute (BMI), Columbus, OH/Joint Vaccine Acquisition Program (JVAP), Fort Detrick, MD) two-fold in ELISA diluent (1X PBS, 5% milk, 0.1% Tween-20), starting at a 1:100 dilution. Patient samples were diluted 6 times, two-fold, in duplicate, starting at a 1:62.5 dilution. In addition, a serum sample from an Ebola virus survivor, a quality control (QC) low, a QC high, and a negative serum sample (BMI/JVAP) were included on each plate as internal controls to monitor assay performance. Diluted samples and controls were transferred to the coated 96-well plates and absorbed for 1 hour at 37°C. Plates were washed three times using ELISA wash buffer (1X PBS, 0.1% Tween-20). 100 µl of goat anti-human IgG HRP conjugate (Jackson Labs 109-035-098) diluted 1:10,000 in ELISA diluent was added to each well, and plates were incubated for 1 hour at 37°C. Plates were then washed five times, and 100 µl of tetramethylbenzidine (Thermo Scientific N301) was added to each well. Plates were incubated in the dark for 10 minutes at room temperature followed by addition

of 100 µl of stop solution (Thermo Scientific N600) to each well. All plates were read within 30 minutes at an absorbance wavelength of 450 nm and a reference wavelength of 650 nm (Spectra Max Plus, Molecular Devices). Data was acquired using SoftMax Pro (v6.5, Molecular Devices) software.

Data from the PREVAIL I vaccine study<sup>1</sup> were used to define a cut-off with which to classify survivors as antibody positive and close contacts as antibody negative. A participant was considered to have elevated antibodies indicative of past Ebola infection if their level was greater than or equal to 548 enzyme-linked immunosorbent assay units (EU)/mL; a value that represents the 95<sup>th</sup> percentile of the baseline antibody distribution of PREVAIL I participants. The 1,500 adult Liberian participants in PREVAIL I did not have a history of EVD; had a median age of 30 years; 37% were female; and 5.2% were HIV infected<sup>1</sup>.

To characterize the diagnostic performance of the 548 EU/ml cut-off, we identified negative and positive samples and used these to construct a received operating characteristics (ROC) curve. For EBOV negative samples, we used serum obtained between 2004 and 2011 from 92 adults in Mali, a country where there had been no reported outbreaks of EBOV infection during that time period. Presumed EBOV antibody-positive samples were from 773 Liberian survivors of the 2014-2016 Ebola epidemic who were listed on the Liberian MOH Ebola Survivor Registry. Diagnosis of EBOV infection in these individuals was based on admission to an ETU with signs and symptoms consistent with EVD and a documented positive EBOV reverse transcriptase-polymerase chain reaction (RT-PCR) result. Using results from these samples, the area under the curve for the ROC curve was 0.98. The sensitivity using 548 EU/ml was 94.4% and the specificity was 96.7%. Any cut-off value between 219 and 2453 EU/ml, gave a sensitivity over 94% and a specificity of over 96% (Figure S1). Sensitivity analyses displayed considerable robustness to the cut-off: while estimates vary slightly as the cut-off varies, the overall

conclusions regarding which symptoms and findings differed significantly between the groups remained the same.

### **1.3 Ophthalmic Evaluation**

A subset of 564 survivors and 635 contacts who enrolled at the JFK site prior to April 1, 2016 had detailed eye examinations at baseline and 1 year from enrollment. These examinations were performed by an ophthalmologist in an eye clinic at JFK Medical Center. The subset of participants receiving ophthalmologic examinations was similar to the rest of the cohort in terms of demographic characteristics. All participants in the eye sub-study underwent comprehensive ophthalmic evaluation including slit-lamp biomicroscopy with Haag-Streit BQ900 LED slit lamp, dilated indirect ophthalmoscopy of the macula and peripheral retina, and optical coherence tomography (OCT) imaging with a Zeiss Cirrus 5000 OCT device.

Uveitis was defined using Standardization of Uveitis Nomenclature<sup>3</sup>. Findings on examination which led to the designation of uveitis (either active or inactive) included: keratic precipitates, anterior segment cell or flare, hypopyon, posterior synechiae, vitreous cell or haze, chorioretinal scars, and vascular sheathing. Vascular sheathing was classified as inflammatory unless clarified as hypertensive in origin and in the absence of additional evidence of intraocular inflammation.

Best-corrected spherical equivalent visual acuity was assessed at the phoropter with guidance from auto-refraction, using an ETDRS Tumbling E chart. Visual impairment was described using criteria as elaborated in the World Health Organization document "Global Data on Visual Impairments 2010". Best-corrected visual acuity of <20/70 to 20/200 is considered moderate visual impairment, <20/200 to 20/400 is severe visual impairment, and <20/400 is blindness<sup>4</sup>.



## 1.4 Semen Collection

Beginning with the 6-month follow-up visit, males 18 years and older were asked to provide semen samples with a frequency that depended on test results (every 4-6 weeks if negative and every 2 weeks if positive). These participants had similar demographics as other adult male participants except the contacts were slightly older due to the requirement that participants needed to be at least 18 years of age (median age was 29 compared to 23 for the whole cohort of contacts). Samples were tested for the presence of Ebola virus RNA using methods that have been described<sup>5</sup>. Repeat samples of semen were obtained in order to quantify and characterize the number of participants who had viral RNA consistently detected or absent and those who had intermittent viral RNA detected.

## 1.5 Statistical Methods

Unless otherwise stated, analyses were restricted to survivors with a baseline antibody level greater than or equal to 548 EU/mL and to close contacts with levels less than 548 EU/mL (controls) (Supplementary Appendix, Section 1.2).

Tests for differences between survivors and close contact controls were conducted using generalized estimating equations to account for relationships between survivors and close contacts (using an exchangeable correlation structure). Logistic regression was used to study the association of antibody levels and other factors with presence of symptoms, physical exam findings and viral RNA in the semen. For both types of analyses covariates corresponding to clinical site, age, and gender were included in the models. A pooled odds ratio across all visits and the interaction with study visit were estimated. The former provides a more precise

estimate of the relative difference between survivors and close contacts if there is no variation over time. The latter, while a low power test, provides a measure to assess whether the relative difference between survivors and close contacts in these targeted conditions are increasing or decreasing over time. Odds ratios (ORs) associated with a one standard deviation (SD) higher  $\log_{10}$  antibody levels are cited with 95% confidence intervals (CIs).

While strict criteria were used to identify the 11 targeted conditions described in the manuscript, no attempt was made to formally control the family-wide type 1 error across all comparisons. Many comparisons were made and this could be a source of false positives. To provide some context for this, here we describe the tests that were performed in the course of analyzing the large volume of data collected for this study. To examine recalled acute symptoms we conducted 16 hypothesis tests across 2 pairs of groups. To examine self reported symptoms we conducted 89 hypothesis tests across 2 groups at 3 different time points. To examine physical findings we conducted tests for 10 body systems across 2 groups for 3 time points. To provide further insight into these systems we also made comparisons across 2 groups for 50 different specific findings at 3 time points, although we don't report p-values. We also examined 12 laboratory findings at 3 time points for contacts and survivors broken down by age (less than 18 or 18 and older). In addition we report on the prevalence of 4 ophthalmologic outcomes and examine the incidence of 3 of ophthalmologic outcomes. Outcomes of hypothesis tests of associations between the targeted outcomes, serology and shedding in semen are reported. Finally tests for an association of shedding and time since infection are reported. The strict p-value criterion enforced for the identification of our targeted conditions can be interpreted as providing protection from type 1 errors for up to 500 hypothesis tests.

Tests for differences in self-reported symptoms listed on the baseline case report form, systems level abnormalities from the physical exam (e.g. any chest abnormality), ophthalmologic findings

and characterization of EBOV positivity in semen required a p-value of 0.0001 to be reported here while other tests required a p-value of 0.01. These tests included differences between survivors and contacts in recall of symptoms during acute disease, age, body mass index, frequency of pregnancy, specific exam findings (e.g. prevalence of muscle tenderness), laboratory findings, incidence of new symptoms among the identified targeted symptoms as well as differences between antibody-positive close contacts and antibody-negative close contacts and the association between uveitis and the detection of vira RNA in at least 1 semen donation among survivors providing semen samples. Comparisons of self-reported symptoms listed on the baseline case report form and findings on physical exam (including uveitis) were preplanned while others were not.

## **2 SUPPLEMENTARY RESULTS**

### **2.1 Characteristics of Antibody Positive and Antibody Negative Survivors and Close Contacts**

Antibody levels for MOH-reported survivors and self-reported close contacts varied by age: (the medians were 28,017 versus 63 EU/mL for those 12 years of age and less, 22,564 versus 84 EU/mL for those 12-17 years, and 18,288 versus 90 EU/mL for those 18 and older). Antibody levels corresponding to the 25<sup>th</sup>, 75<sup>th</sup>, and 95<sup>th</sup> percentiles for adult close contacts were 56, 240, and 9,593 EU/mL, respectively. In PREVAIL I, the levels corresponding to these percentiles were 47, 139, and 548 EU/mL, respectively (Unpublished data).

To further characterize the antibody positive close contacts, we compared the symptom history they reported at the time of their linked survivor's acute illness with that reported by antibody negative close contacts. Most symptoms were reported with at least 2-fold greater frequency among the antibody positive close contacts compared to the antibody negative close contacts,

with vomiting, unexplained bleeding, red eyes, and sore throat all reported at more than 4-fold greater frequency. Among antibody positive contacts, there was a positive correlation between antibody levels and the proportion of subjects reporting EVD-like symptoms. For those in the top 75 percentile of antibody levels, 52% report EVD-like symptoms (i.e. at least one symptom of those listed in Table S1), for those in the top 50 percentile of antibody levels, 62% report symptoms and for those in the top 25 percentile of antibody levels, 75% report symptoms. By comparison, 99% of antibody positive survivors reported at least one symptom associated with their acute illness (Table S2).

The median antibody concentration for adult survivors of 19,242 EU/mL was much greater than the peak antibody response one month following vaccination observed with the two vaccines studied in PREVAIL I (630 and 1,090 EU/mL, respectively)<sup>1</sup>. For the 13% of MOH-reported survivors with antibody levels below the positive cut-off, our data suggest that some may have been misidentified as having EVD and point to the challenges of diagnostic testing during an Ebola outbreak.

The median antibody level for adult self-reported close contacts enrolled (83 EU/mL) was similar to the median pre-vaccination (baseline) antibody level in the PREVAIL I Ebola vaccine study (78 EU/mL)<sup>1</sup>. However, 11% of adult close contacts in the current study had Ebola antibodies detected above 548 EU/mL compared with 5% in PREVAIL I. Based on the distribution of antibody levels and reported symptoms by the close contacts at the time of the epidemic, these individuals likely represent a heterogeneous group, some of whom likely experienced unidentified symptomatic or possibly asymptomatic Ebola infection.

## **2.2 Demographic and Baseline Clinical Findings of Antibody Positive Survivors and Antibody Negative Close Contacts**

The median time between the onset of acute EVD and the baseline PREVAIL III visit was 358 days (quartiles 313, 405). Enrolled contacts were younger than survivors (Table 1 and Figure 1A). For the survivors, baseline antibody levels were higher in the younger age groups (Table 1). Compared with the close contact group, more survivors in the 12 year and older age groups were pregnant at their baseline visit (Table 1). Twelve (1.4%) survivors and 51 (2.7%) close contacts were HIV positive at their baseline visit. Of the 539 survivors who provided information on condom use, 61% reported never using condoms, 33% sometimes used condoms, and 6% reported always using condoms.

Among close contacts, 318 (14%) reported having sexual contact with a convalescent survivor and 1612 (69%) were living in the same household as the survivor during the survivor's acute illness. Of those close contacts who recounted being in the same household, 85% reported having direct physical contact, contact with clothing or bodily fluids, or being in the same room with the survivor during the survivor's acute illness.

## **2.3 Clinical Findings at Follow-up Visits**

The prevalence of headache and memory loss reported at follow-up visits decreased to a greater degree in contacts than in survivors, leading to an increase over time in the odds ratio for these symptoms (Table 2). In contrast, the prevalence of other targeted symptoms either decreased to a greater degree in survivors than contacts (urinary frequency, muscle pain) or decreased to an approximately equal degree in both groups (fatigue, joint pain; Table 2).

Abnormal targeted physical examination findings observed more frequently in survivors compared to close contacts at baseline also decreased at the 6- and 12-month follow-up visits in both groups, but all remained higher in survivors than close contacts (Table 2). Interaction p-values in Table 2 indicate that relative differences between survivors and close contacts for each physical examination finding are similar over follow-up. Pooled (over the baseline, 6-month and 12-month visits) odds ratios are cited in Figure S3. No additional symptoms or findings emerged during follow-up for which the p-value for the difference between survivors and close contacts was  $<0.0001$ . Also, there were no new symptoms for which the difference between survivors and close contacts exceeded 10% (Tables S4-S8).

## **2.4 Ophthalmologic Findings**

The median visual acuity in individual eyes with uveitis was 20/25 (quartiles 20/20 and 20/32) while the median visual acuity in eyes that did not have uveitis was 20/20 (quartiles 20/20 and 20/25); this difference was statistically significant ( $p<0.0001$ ). Seventeen of the 301 eyes from both groups with uveitis had a visual acuity  $<20/200$ ; 11 (5.4%) among survivor eyes with uveitis and 6 (6.2%) among contact eyes with uveitis. Having uveitis was significantly associated with blindness ( $p<0.0001$  for having the condition in either eye).

## **2.5 Association of Baseline Antibody Levels with Symptoms and Examination Findings**

We examined the association between self-reported joint pain and antibody levels for survivors. The median level was 19,479 EU/mL among survivors reporting joint pain and 19,152 EU/mL for survivors who did not report joint pain ( $p=0.72$ ). With adjustment for age and female gender, the OR associated with a SD higher  $\log_{10}$  IgG level was 1.01 (95% CI: 0.88 to 1.15;  $p=0.92$ ).

For survivors, there was no association between the presence of uveitis and levels of Ebola-specific antibody (OR=1.37, 95% CI: 0.76 to 2.47 for a SD higher in  $\log_{10}$  IgG level). We also compared antibody levels for survivors with any abnormal finding on abdominal, neurological or musculoskeletal examination (18.4%) with those who had no abnormal findings. The median antibody level was lower among those with an abnormality (18,143 EU/mL) as compared to those without an abnormality (19,761 EU/mL) ( $p=0.08$ ). With adjustment for site, age and female gender, the latter two of which were associated with an increased risk of an abnormality, antibody levels were lower among survivors with an abnormal finding compared to those who did not have an abnormal finding on abdominal, neurological and musculoskeletal examination ( $p=0.037$ ).

We found no evidence for a higher rate of EBOV seropositivity among female sexual contacts of men whose semen tested positive for EBOV RNA. We found that 10.70% of sexual contacts of men enrolled in the semen study were seropositive and 10.71% of sexual contacts of men who test positive at least once and report never using condoms are seropositive.

## **2.6 Correlations of Viral RNA Semen with Examination Findings and Antibody Levels**

We found no correlation between persistence of viral RNA in semen and the presence of abdominal, chest, neurologic, musculoskeletal, or urinary symptoms or plasma levels of D-dimer. However, in longitudinal analyses that account for time since acute infection, men testing positive for viral RNA in their semen had significantly higher levels of Ebola-specific IgG antibody when compared to men testing negative (OR=1.50, 95% CI: 1.12 to 2.02 for a SD higher in  $\log_{10}$  antibody levels,  $p=0.03$ ). Older age was also associated with having a positive semen result ( $p<0.0001$ ) in longitudinal models.

One hundred ninety-one antibody negative close contacts provided one or more semen samples. No RNA positive semen samples were detected in these close contacts.



### 3 SUPPLEMENTARY FIGURES AND TABLES

#### 3.1 Figure S1

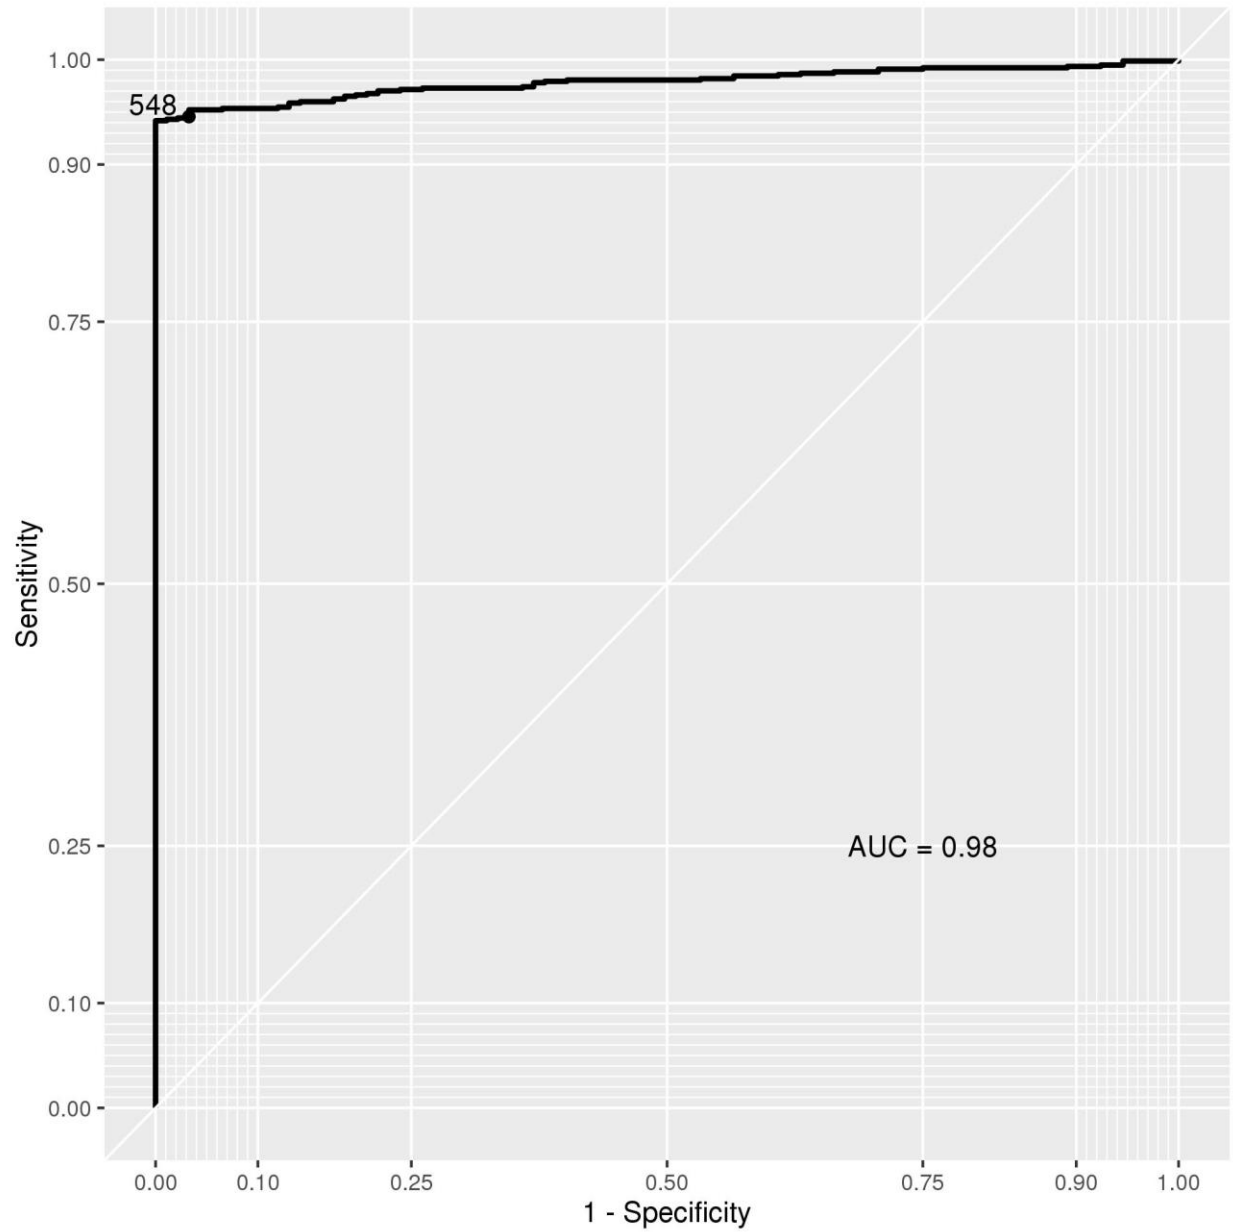

Figure S1: The receiver operating characteristic curve for the FANG assay.

3.2 Figure S2

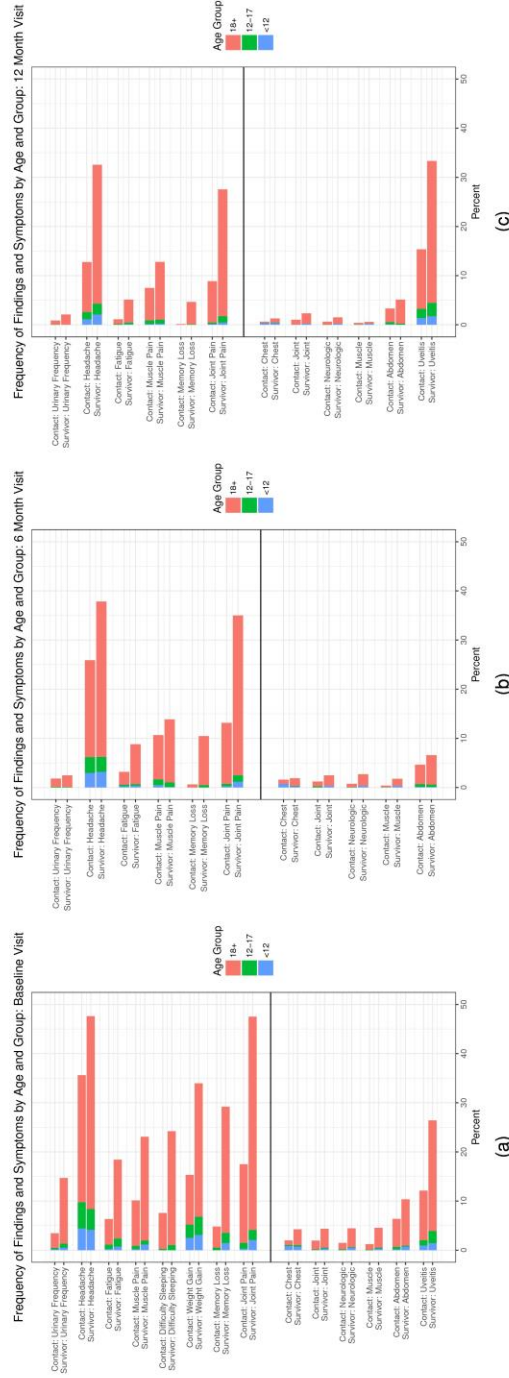

Figure S2: Summary of selected symptoms and physical exam findings for survivors and close contacts enrolled in PREVAIL III over time. All estimates are adjusted for age, gender, site and relations amongs contacts and survivors. Only a subset of participants received eye exams.

### 3.3 Figure S3

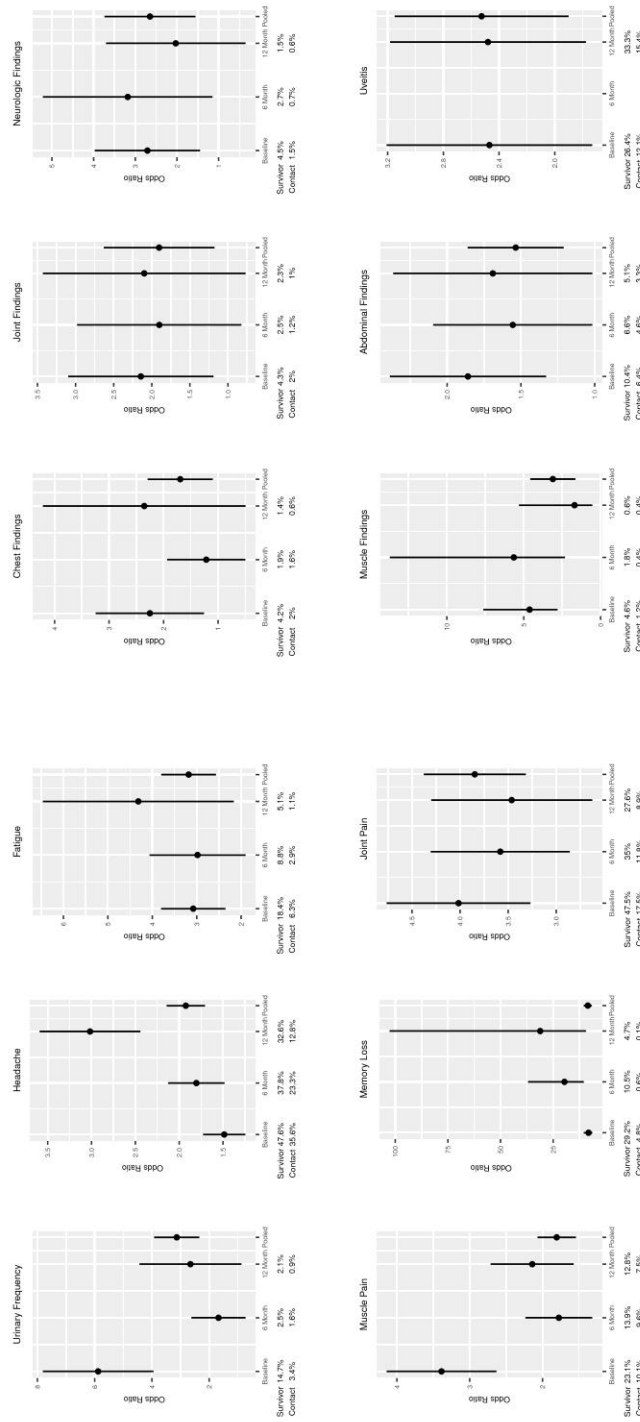

Figure S3: Summary of odds ratios for selected symptoms and physical exam findings for survivors and close contacts enrolled in PREVAIL III over time. All estimates are adjusted for age, gender, site and relations among contacts and survivors. Uveitis was not assessed at the 6 month exam.

### 3.4 Table S1

| Symptom                | Seropositive Contacts |         | Seronegative Contacts |         | <i>p</i> -value for difference |
|------------------------|-----------------------|---------|-----------------------|---------|--------------------------------|
|                        | Number                | Percent | Number                | Percent |                                |
| Fever                  | 75                    | 34.25   | 304                   | 18.74   | < 0.001                        |
| Loss of Appetite       | 71                    | 32.42   | 201                   | 12.39   | < 0.001                        |
| Nausea                 | 50                    | 22.83   | 127                   | 7.83    | < 0.001                        |
| Vomiting               | 52                    | 23.74   | 90                    | 5.55    | < 0.001                        |
| Diarrhea               | 43                    | 19.63   | 110                   | 6.78    | < 0.001                        |
| Headache               | 83                    | 37.9    | 341                   | 21.02   | < 0.001                        |
| Abdominal Pain         | 46                    | 21      | 130                   | 8.01    | < 0.001                        |
| Unexplained Bleeding   | 7                     | 3.2     | 6                     | 0.37    | < 0.001                        |
| Myalgia                | 51                    | 23.29   | 159                   | 9.8     | < 0.001                        |
| Arthralgia             | 52                    | 23.74   | 162                   | 9.99    | < 0.001                        |
| Breathing Difficulties | 25                    | 11.42   | 54                    | 3.33    | < 0.001                        |
| Shortness of Breath    | 25                    | 11.42   | 48                    | 2.96    | < 0.001                        |
| Hiccups                | 12                    | 5.48    | 23                    | 1.42    | < 0.001                        |
| Red Eyes               | 25                    | 11.42   | 44                    | 2.71    | < 0.001                        |
| Fatigue                | 63                    | 28.77   | 195                   | 12.02   | < 0.001                        |
| Sore Throat            | 23                    | 10.5    | 38                    | 2.34    | < 0.001                        |
| Any of the Above       | 102                   | 46.58   | 497                   | 30.64   | < 0.001                        |

Table S1: Summary of self reported symptoms at time of survivor's infection among self reported close contacts. This was the entire collection of acute symptoms for which we collected data across the whole cohort. The test statistics control for age, gender, site and relationships among close contacts.

### 3.5 Table S2

| Symptom                | Seropositive Survivors |         | Seronegative Survivors |         | <i>p</i> -value for difference |
|------------------------|------------------------|---------|------------------------|---------|--------------------------------|
|                        | Number                 | Percent | Number                 | Percent |                                |
| Fever                  | 865                    | 89.54   | 126                    | 88.73   | 0.389                          |
| Loss of Appetite       | 868                    | 89.86   | 122                    | 85.92   | 0.040                          |
| Nausea                 | 811                    | 83.95   | 111                    | 78.17   | 0.012                          |
| Vomiting               | 799                    | 82.71   | 97                     | 68.31   | < 0.001                        |
| Diarrhea               | 804                    | 83.23   | 94                     | 66.20   | < 0.001                        |
| Headache               | 865                    | 89.54   | 125                    | 88.03   | 0.299                          |
| Abdominal Pain         | 678                    | 70.19   | 91                     | 64.08   | 0.033                          |
| Unexplained Bleeding   | 171                    | 17.70   | 14                     | 9.86    | 0.011                          |
| Myalgia                | 844                    | 87.37   | 121                    | 85.21   | 0.243                          |
| Arthralgia             | 850                    | 87.99   | 120                    | 84.51   | 0.107                          |
| Breathing Difficulties | 435                    | 45.03   | 69                     | 48.59   | 0.641                          |
| Shortness of Breath    | 418                    | 43.27   | 68                     | 47.89   | 0.749                          |
| Hiccups                | 242                    | 25.05   | 41                     | 28.87   | 0.684                          |
| Red Eyes               | 505                    | 52.28   | 62                     | 43.66   | 0.011                          |
| Fatigue                | 920                    | 95.24   | 127                    | 89.44   | 0.002                          |
| Sore Throat            | 371                    | 38.41   | 51                     | 35.92   | 0.230                          |
| Any of the Above       | 957                    | 99.07   | 138                    | 97.18   | 0.019                          |

Table S2: Summary of self reported symptoms at time of infection among self reported survivors. This was the entire collection of acute symptoms for which we collected data across the whole cohort. The test statistics control for age, gender and site.

### 3.6 Table S3

| No. Visits | No. Men | All + No. (%) | All - No. (%) | Mean Percent (Range Percent) |
|------------|---------|---------------|---------------|------------------------------|
| 1          | 16      | 1 (6.25)      | 15 (93.75)    | NA                           |
| 2          | 21      | 2 (9.52)      | 17 (80.95)    | 50 (50, 50)                  |
| 3          | 12      | 0 (0)         | 8 (66.67)     | 33.33 (33.33, 33.33)         |
| 4          | 12      | 0 (0)         | 8 (66.67)     | 37.5 (25, 75)                |
| 5          | 9       | 0 (0)         | 6 (66.67)     | 40 (20, 60)                  |
| 6          | 19      | 0 (0)         | 12 (63.16)    | 40.48 (16.67, 83.33)         |
| 7          | 14      | 0 (0)         | 12 (85.71)    | 14.29 (14.29, 14.29)         |
| 8          | 11      | 0 (0)         | 9 (81.82)     | 43.75 (25, 62.5)             |
| 9          | 24      | 0 (0)         | 16 (66.67)    | 23.61 (11.11, 55.56)         |
| 10         | 14      | 0 (0)         | 11 (78.57)    | 30 (10, 70)                  |
| 11         | 16      | 0 (0)         | 14 (87.5)     | 27.27 (18.18, 36.36)         |
| 12 or more | 99      | 0 (0)         | 58 (58.59)    | 19.27 (5.88, 91.67)          |
| Total      | 267     | 3 (1.12)      | 186 (69.66)   | 8.71 (5.88, 91.67)           |

Table S3: PREVAIL III semen results: + stands for Ebola RNA detected and - stands for Ebola RNA not detected with results presented for all men with a certain number of visits (for example, 16 men had 1 visit, with 15 men having a negative result on this single donation). Among survivors 30% have Ebola RNA detected in semen at least once. These results are based on a total of 2411 samples from 267 survivors. One positive sample was from a survivor who was infected over 40 months prior to sampling and the majority of positive samples were obtained more than a year after the survivor was infected.

### 3.7 Table S4

| Symptom                    | Survivors<br>(N = 966) | Close Contacts<br>(N = 2350) | Estimated Odds Ratio |
|----------------------------|------------------------|------------------------------|----------------------|
| Most Common: >5%           |                        |                              |                      |
| Weight gain                | 328 (34%)              | 360 (15.3%)                  | 4.79 (3.79, 6.04)    |
| Trouble sleeping           | 209 (24.3%)            | 145 (7.6%)                   | 4.27 (3.3, 5.53)     |
| Joint pain                 | 459 (47.5%)            | 411 (17.5%)                  | 4.12 (3.42, 4.98)    |
| Fatigue                    | 178 (18.4%)            | 149 (6.3%)                   | 3.11 (2.46, 3.95)    |
| Muscle pain                | 223 (23.1%)            | 238 (10.1%)                  | 3 (2.42, 3.71)       |
| Impotence/decreased libido | 66 (15.1%)             | 55 (5.3%)                    | 2.76 (1.76, 4.32)    |
| Dizziness                  | 129 (13.4%)            | 164 (7%)                     | 2.32 (1.76, 3.05)    |
| Anorexia                   | 182 (18.8%)            | 241 (10.3%)                  | 2.1 (1.68, 2.61)     |
| Palpitations               | 160 (16.6%)            | 218 (9.3%)                   | 2.03 (1.6, 2.57)     |
| Loss of vision             | 132 (13.7%)            | 161 (6.9%)                   | 1.99 (1.5, 2.64)     |
| Chest pain                 | 157 (16.3%)            | 222 (9.4%)                   | 1.83 (1.45, 2.33)    |
| Amenorrhea                 | 75 (14.2%)             | 134 (10.2%)                  | 1.76 (1.27, 2.43)    |
| Itching                    | 102 (10.6%)            | 156 (6.6%)                   | 1.72 (1.32, 2.25)    |
| Headache                   | 460 (47.6%)            | 837 (35.6%)                  | 1.58 (1.35, 1.85)    |
| Chills                     | 104 (10.8%)            | 173 (7.4%)                   | 1.55 (1.19, 2.01)    |
| Abdominal pain             | 224 (23.2%)            | 430 (18.3%)                  | 1.42 (1.18, 1.71)    |
| Less Common: 1%-5%         |                        |                              |                      |
| Memory loss                | 282 (29.2%)            | 113 (4.8%)                   | 9.28 (7.17, 12)      |
| Tinnitus                   | 69 (7.1%)              | 24 (1%)                      | 7.79 (4.71, 12.88)   |
| Urinary urgency            | 66 (6.8%)              | 38 (1.6%)                    | 6.04 (3.94, 9.26)    |
| Urinary frequency          | 142 (14.7%)            | 81 (3.4%)                    | 5.88 (4.26, 8.12)    |
| Female decreased libido    | 93 (17.6%)             | 58 (4.4%)                    | 4.34 (3, 6.29)       |
| Paresthesia                | 117 (12.1%)            | 74 (3.1%)                    | 3.89 (2.83, 5.35)    |
| Shortness of breath        | 37 (3.8%)              | 25 (1.1%)                    | 3.67 (2.14, 6.29)    |
| Diplopia                   | 46 (4.8%)              | 40 (1.7%)                    | 3.27 (2.05, 5.22)    |
| ENT pain                   | 50 (5.2%)              | 50 (2.1%)                    | 3.07 (1.98, 4.76)    |
| Decreased hearing          | 66 (6.8%)              | 52 (2.2%)                    | 3.07 (2.07, 4.55)    |
| Female Reproductive Odor   | 30 (5.7%)              | 35 (2.7%)                    | 2.46 (1.43, 4.23)    |
| Nausea                     | 69 (7.1%)              | 74 (3.1%)                    | 2.37 (1.66, 3.39)    |
| Nocturia                   | 86 (8.9%)              | 98 (4.2%)                    | 2.07 (1.53, 2.8)     |
| Rare: <1%                  |                        |                              |                      |
| Orchitis                   | 11 (2.5%)              | 1 (0.1%)                     | 32.1 (4.15, 248)     |
| Musculoskeletal stiffness  | 46 (4.8%)              | 6 (0.3%)                     | 24.59 (10.44, 57.93) |
| Vertigo                    | 43 (4.5%)              | 6 (0.3%)                     | 15.21 (6.18, 37.44)  |
| Dyspnea                    | 15 (1.6%)              | 5 (0.2%)                     | 10.17 (3.27, 31.59)  |
| Musculoskeletal heat       | 43 (4.5%)              | 14 (0.6%)                    | 8.9 (4.56, 17.35)    |
| Change in bowel habits     | 25 (2.6%)              | 8 (0.3%)                     | 8.26 (3.36, 20.36)   |
| PND                        | 21 (2.2%)              | 7 (0.3%)                     | 8.06 (3.4, 19.1)     |
| Hair and/or nail changes   | 34 (3.5%)              | 12 (0.5%)                    | 7.64 (3.96, 14.75)   |
| Musculoskeletal edema      | 18 (1.9%)              | 7 (0.3%)                     | 7.4 (3, 18.25)       |
| Ataxia                     | 24 (2.5%)              | 11 (0.5%)                    | 5.84 (2.68, 12.73)   |
| Hoarseness                 | 14 (1.4%)              | 6 (0.3%)                     | 5.78 (2.16, 15.46)   |
| Melena                     | 13 (1.3%)              | 6 (0.3%)                     | 5.71 (2.2, 14.82)    |
| Polyuria                   | 27 (2.8%)              | 15 (0.6%)                    | 5.04 (2.63, 9.65)    |
| Enlargement of lymph nodes | 10 (1%)                | 8 (0.3%)                     | 4.35 (1.74, 10.87)   |
| Weakness in any limb       | 39 (4%)                | 21 (0.9%)                    | 4.28 (2.41, 7.6)     |
| Wheezing                   | 9 (0.9%)               | 7 (0.3%)                     | 4.22 (1.69, 10.52)   |
| Tremor                     | 39 (4%)                | 23 (1%)                      | 3.63 (2.03, 6.48)    |
| Cardiovascular edema       | 13 (1.3%)              | 10 (0.4%)                    | 3.05 (1.34, 6.95)    |
| Incontinence               | 23 (2.4%)              | 21 (0.9%)                    | 2.94 (1.67, 5.18)    |

Table S4: Self reported symptoms that differ between survivors and close contacts with a  $p$ -value less than 0.01 at the baseline visit. The test statistics control for age, gender, site and relationships among survivors and close contacts.

### 3.8 Table S5

| Symptom                   | Survivors<br>(N = 966) | Close Contacts<br>(N = 2350) |
|---------------------------|------------------------|------------------------------|
| Fever                     | 198 (20.5%)            | 483 (20.6%)                  |
| Painful periods           | 91 (17.2%)             | 199 (15.2%)                  |
| Cough/sputum              | 125 (12.9%)            | 328 (14%)                    |
| Menopause                 | 56 (10.6%)             | 134 (10.2%)                  |
| Weight loss               | 121 (12.5%)            | 239 (10.2%)                  |
| Dysuria                   | 86 (8.9%)              | 152 (6.5%)                   |
| Night sweats              | 69 (7.1%)              | 139 (5.9%)                   |
| Rash                      | 50 (5.2%)              | 97 (4.1%)                    |
| Nipple discharge          | 15 (1.6%)              | 54 (2.3%)                    |
| Dysphagia                 | 25 (2.6%)              | 54 (2.3%)                    |
| Discharge from nose       | 10 (1%)                | 41 (1.7%)                    |
| Testicular pain or mass   | 8 (1.8%)               | 14 (1.3%)                    |
| Breast pain               | 19 (2%)                | 28 (1.2%)                    |
| Diarrhea                  | 21 (2.2%)              | 28 (1.2%)                    |
| Penile discharge          | 6 (1.4%)               | 9 (0.9%)                     |
| Discharge from ear        | 9 (0.9%)               | 20 (0.9%)                    |
| Depigmentation            | 12 (1.2%)              | 17 (0.7%)                    |
| Jaundice                  | 6 (0.6%)               | 16 (0.7%)                    |
| Menarche                  | 1 (0.2%)               | 8 (0.6%)                     |
| Musculoskeletal deformity | 9 (0.9%)               | 11 (0.5%)                    |
| Skin lumps and/or bumps   | 8 (0.8%)               | 10 (0.4%)                    |
| Postmenopausal symptoms   | 6 (1.1%)               | 4 (0.3%)                     |
| Abnormal vaginal bleeding | 7 (1.3%)               | 4 (0.3%)                     |
| Rectal bleeding           | 12 (1.2%)              | 7 (0.3%)                     |
| Breast lumps              | 6 (0.6%)               | 5 (0.2%)                     |
| Vomiting                  | 8 (0.8%)               | 5 (0.2%)                     |
| Syncope                   | 1 (0.1%)               | 5 (0.2%)                     |
| Nose bleeds               | 2 (0.2%)               | 3 (0.1%)                     |
| Positive TB test          | 4 (0.4%)               | 3 (0.1%)                     |
| Hematuria                 | 2 (0.2%)               | 3 (0.1%)                     |
| Urinary hesitancy         | 7 (0.7%)               | 3 (0.1%)                     |
| Infertility               | 0 (0%)                 | 1 (0.1%)                     |
| Respiratory congestion    | 7 (0.7%)               | 2 (0.1%)                     |
| Paralysis                 | 1 (0.1%)               | 1 (0%)                       |
| Orthopnea                 | 11 (1.1%)              | 0 (0%)                       |
| Hemoptysis                | 1 (0.1%)               | 0 (0%)                       |
| Hematemesis               | 0 (0%)                 | 0 (0%)                       |
| Musculoskeletal redness   | 0 (0%)                 | 0 (0%)                       |
| Muscle tenderness         | 6 (0.6%)               | 0 (0%)                       |
| Seizures                  | 4 (0.4%)               | 0 (0%)                       |
| Bruising                  | 4 (0.4%)               | 0 (0%)                       |

Table S5: Self reported symptoms whose differences are not statistically significant between survivors and close contacts at the baseline visit. The test statistics (not shown) control for age, gender, site and relationships among survivors and close contacts.

### 3.9 Table S6

| Symptom                    | Survivors<br>(N = 851) | Close Contacts<br>(N = 2137) | Estimated Odds Ratio |
|----------------------------|------------------------|------------------------------|----------------------|
| Most Common: >5%           |                        |                              |                      |
| Joint pain                 | 298 (35%)              | 253 (11.8%)                  | 3.55 (2.9, 4.35)     |
| Anorexia                   | 99 (11.6%)             | 130 (6.1%)                   | 2.02 (1.51, 2.71)    |
| Headache                   | 322 (37.8%)            | 498 (23.3%)                  | 1.85 (1.54, 2.21)    |
| Muscle pain                | 118 (13.9%)            | 205 (9.6%)                   | 1.8 (1.39, 2.35)     |
| Fever                      | 177 (20.8%)            | 286 (13.4%)                  | 1.56 (1.25, 1.94)    |
| Chest pain                 | 81 (9.5%)              | 120 (5.6%)                   | 1.56 (1.15, 2.1)     |
| Cough/sputum               | 96 (11.3%)             | 188 (8.8%)                   | 1.5 (1.14, 1.96)     |
| Less Common: 1%-5%         |                        |                              |                      |
| Female decreased libido    | 50 (10.7%)             | 17 (1.4%)                    | 6.89 (3.91, 12.11)   |
| Fatigue                    | 75 (8.8%)              | 61 (2.9%)                    | 2.97 (2.07, 4.25)    |
| Night sweats               | 49 (5.8%)              | 38 (1.8%)                    | 2.94 (1.85, 4.65)    |
| Dizziness                  | 67 (7.9%)              | 81 (3.8%)                    | 2.55 (1.78, 3.65)    |
| Impotence/decreased libido | 32 (8.4%)              | 27 (2.9%)                    | 2.34 (1.34, 4.07)    |
| Palpitations               | 71 (8.3%)              | 78 (3.6%)                    | 2.31 (1.62, 3.29)    |
| Itching                    | 58 (6.8%)              | 80 (3.7%)                    | 1.79 (1.26, 2.55)    |
| Dysuria                    | 50 (5.9%)              | 70 (3.3%)                    | 1.78 (1.2, 2.65)     |
| Rare: <1%                  |                        |                              |                      |
| Memory loss                | 89 (10.5%)             | 12 (0.6%)                    | 16.37 (8.84, 30.3)   |
| Tremor                     | 10 (1.2%)              | 2 (0.1%)                     | 10.28 (2.17, 48.76)  |
| Weakness in any limb       | 14 (1.6%)              | 4 (0.2%)                     | 7.25 (2.27, 23.13)   |
| Decreased hearing          | 33 (3.9%)              | 13 (0.6%)                    | 6.03 (2.92, 12.42)   |
| Abnormal vaginal bleeding  | 6 (1.3%)               | 3 (0.3%)                     | 5.93 (1.57, 22.46)   |
| ENT pain                   | 23 (2.7%)              | 12 (0.6%)                    | 5.73 (2.58, 12.74)   |
| Paresthesia                | 31 (3.6%)              | 13 (0.6%)                    | 5.34 (2.63, 10.86)   |
| Change in bowel habits     | 14 (1.6%)              | 6 (0.3%)                     | 5.09 (2.03, 12.72)   |
| Diarrhea                   | 12 (1.4%)              | 8 (0.4%)                     | 4.84 (2.07, 11.32)   |
| Diplopia                   | 16 (1.9%)              | 15 (0.7%)                    | 2.96 (1.41, 6.19)    |

Table S6: Self reported symptoms that differ between survivors and close contacts with a significance level of 1% at the 6 month visit. The test statistics control for age, gender, site and relationships among survivors and close contacts.



### 3.10 Table S7

| Symptom                    | Survivors<br>(N = 860) | Close Contacts<br>(N = 2053) | Estimated Odds Ratio |
|----------------------------|------------------------|------------------------------|----------------------|
| Most Common: >5%           |                        |                              |                      |
| Joint pain                 | 237 (27.6%)            | 182 (8.9%)                   | 3.36 (2.64, 4.28)    |
| Headache                   | 280 (32.6%)            | 262 (12.8%)                  | 2.82 (2.31, 3.44)    |
| Muscle pain                | 110 (12.8%)            | 154 (7.5%)                   | 2.55 (1.91, 3.42)    |
| Abdominal pain             | 100 (11.6%)            | 130 (6.3%)                   | 2.09 (1.56, 2.8)     |
| Cough/sputum               | 78 (9.1%)              | 111 (5.4%)                   | 2 (1.44, 2.76)       |
| Fever                      | 130 (15.1%)            | 159 (7.7%)                   | 1.77 (1.37, 2.28)    |
| Amenorrhea                 | 59 (12.6%)             | 117 (10.3%)                  | 1.6 (1.13, 2.27)     |
| Less Common: 1%-5%         |                        |                              |                      |
| Fatigue                    | 44 (5.1%)              | 23 (1.1%)                    | 4.22 (2.55, 7)       |
| Palpitations               | 47 (5.5%)              | 36 (1.8%)                    | 2.61 (1.63, 4.19)    |
| Nocturia                   | 22 (2.6%)              | 31 (1.5%)                    | 2.21 (1.31, 3.74)    |
| Chills                     | 61 (7.1%)              | 62 (3%)                      | 2.19 (1.51, 3.18)    |
| Anorexia                   | 72 (8.4%)              | 76 (3.7%)                    | 2.15 (1.54, 2.99)    |
| Chest pain                 | 64 (7.4%)              | 66 (3.2%)                    | 1.98 (1.37, 2.86)    |
| Rare: <1%                  |                        |                              |                      |
| Dysphagia                  | 16 (1.9%)              | 7 (0.3%)                     | 5.71 (2.21, 14.76)   |
| Impotence/decreased libido | 23 (5.9%)              | 9 (1%)                       | 5.4 (2.25, 12.93)    |
| Decreased hearing          | 22 (2.6%)              | 11 (0.5%)                    | 4.24 (1.9, 9.43)     |
| Nausea                     | 17 (2%)                | 11 (0.5%)                    | 4.21 (1.78, 9.97)    |

Table S7: Self reported symptoms that differ between survivors and close contacts with a significance level of 1% at the 12 month visit. The test statistics control for age, gender, site and relationships among survivors and close contacts.

### 3.11 Table S8

| Finding                     | Baseline Visit        |                             |                        | 6 Month Visit         |                             |                        | 12 Month Visit        |                             |                        |
|-----------------------------|-----------------------|-----------------------------|------------------------|-----------------------|-----------------------------|------------------------|-----------------------|-----------------------------|------------------------|
|                             | Survivor<br>(N = 966) | Close Contact<br>(N = 2350) | p-value for difference | Survivor<br>(N = 851) | Close Contact<br>(N = 2137) | p-value for difference | Survivor<br>(N = 860) | Close Contact<br>(N = 2053) | p-value for difference |
| Head/face                   | 6 (0.6%)              | 7 (0.3%)                    | 0.046                  | 3 (0.4%)              | 4 (0.2%)                    | 0.348                  | 2 (0.2%)              | 2 (0.1%)                    | 0.348                  |
| Head/face: Deformity        | 1                     | 0                           |                        | 2                     | 0                           |                        | 1                     | 1                           |                        |
| Swelling                    | 2                     | 6                           |                        | 0                     | 4                           |                        | 0                     | 0                           |                        |
| Asymmetry                   | 3                     | 3                           |                        | 2                     | 1                           |                        | 1                     | 1                           |                        |
| Ears, Nose, and Throat      | 229 (23.7%)           | 512 (21.8%)                 | 0.307                  | 201 (23.6%)           | 404 (18.9%)                 | 0.626                  | 233 (27.1%)           | 382 (18.6%)                 | 0.05                   |
| Nose: Mucosa                | 1                     | 10                          |                        | 3                     | 5                           |                        | 1                     | 3                           |                        |
| Nose: Ulcer                 | 0                     | 2                           |                        | 1                     | 1                           |                        | 0                     | 0                           |                        |
| Ear: TM                     | 6                     | 5                           |                        | 1                     | 1                           |                        | 0                     | 1                           |                        |
| Ear: Ext. Canal             | 4                     | 2                           |                        | 0                     | 0                           |                        | 0                     | 1                           |                        |
| Ear: Hearing                | 36                    | 12                          |                        | 17                    | 4                           |                        | 8                     | 3                           |                        |
| Mouth/Throat: Mucosa        | 1                     | 3                           |                        | 1                     | 1                           |                        | 0                     | 0                           |                        |
| Mouth/Throat: Mass          | 0                     | 1                           |                        | 0                     | 2                           |                        | 0                     | 1                           |                        |
| Mouth/Throat: Ulcer         | 5                     | 6                           |                        | 1                     | 4                           |                        | 1                     | 0                           |                        |
| Mouth/Throat: Missing Teeth | 90                    | 249                         |                        | 129                   | 238                         |                        | 158                   | 241                         |                        |
| Mouth/Throat: Dental Caries | 168                   | 393                         |                        | 140                   | 298                         |                        | 169                   | 275                         |                        |
| Chest                       | 41 (4.2%)             | 47 (2%)                     | < 0.0001               | 16 (1.9%)             | 34 (1.6%)                   | 0.41                   | 11 (1.3%)             | 13 (0.6%)                   | 0.027                  |
| Wheezes                     | 7                     | 2                           |                        | 3                     | 1                           |                        | 1                     | 2                           |                        |
| Decreased Breath Sounds     | 9                     | 10                          |                        | 5                     | 4                           |                        | 5                     | 1                           |                        |
| Heart Murmur                | 9                     | 6                           |                        | 2                     | 3                           |                        | 0                     | 1                           |                        |
| Pericardial Rub             | 4                     | 1                           |                        | 1                     | 1                           |                        | 0                     | 1                           |                        |
| Rales/Crackles              | 8                     | 26                          |                        | 3                     | 22                          |                        | 7                     | 7                           |                        |
| Irregular Heartbeat         | 10                    | 11                          |                        | 4                     | 4                           |                        | 1                     | 1                           |                        |
| Abdomen                     | 100 (10.4%)           | 150 (6.4%)                  | < 0.0001               | 56 (6.6%)             | 99 (4.6%)                   | 0.041                  | 44 (5.1%)             | 68 (3.3%)                   | 0.014                  |
| Splenomegaly                | 3                     | 6                           |                        | 1                     | 5                           |                        | 0                     | 3                           |                        |
| Hepatomegaly                | 7                     | 4                           |                        | 0                     | 1                           |                        | 0                     | 0                           |                        |
| Abdomen: Mass               | 23                    | 47                          |                        | 18                    | 34                          |                        | 13                    | 28                          |                        |
| Abdomen: Tenderness         | 54                    | 86                          |                        | 30                    | 48                          |                        | 28                    | 30                          |                        |
| Distention                  | 18                    | 34                          |                        | 12                    | 30                          |                        | 7                     | 20                          |                        |
| Extremities                 | 30 (3.1%)             | 53 (2.3%)                   | 0.121                  | 16 (1.9%)             | 28 (1.3%)                   | 0.357                  | 13 (1.5%)             | 25 (1.2%)                   | 0.731                  |
| Extremities: Deformity      | 12                    | 30                          |                        | 10                    | 17                          |                        | 10                    | 16                          |                        |
| Edema                       | 15                    | 22                          |                        | 5                     | 9                           |                        | 3                     | 9                           |                        |
| Decreased Pulse             | 7                     | 3                           |                        | 2                     | 1                           |                        | 0                     | 0                           |                        |
| Bruit                       | 1                     | 0                           |                        | 0                     | 1                           |                        | 0                     | 0                           |                        |
| Muscles                     | 44 (4.6%)             | 29 (1.2%)                   | < 0.0001               | 15 (1.8%)             | 8 (0.4%)                    | < 0.0001               | 5 (0.6%)              | 8 (0.4%)                    | 0.642                  |
| Atrophy                     | 4                     | 2                           |                        | 4                     | 3                           |                        | 3                     | 1                           |                        |
| Weakness                    | 5                     | 7                           |                        | 4                     | 3                           |                        | 2                     | 3                           |                        |
| Muscle: Tenderness          | 40                    | 21                          |                        | 10                    | 2                           |                        | 0                     | 5                           |                        |
| Joints                      | 42 (4.3%)             | 46 (2%)                     | < 0.0001               | 21 (2.5%)             | 26 (1.2%)                   | 0.091                  | 20 (2.3%)             | 21 (1%)                     | 0.048                  |
| Swelling/Effusion           | 8                     | 12                          |                        | 4                     | 2                           |                        | 3                     | 5                           |                        |
| Synovial Tenderness         | 6                     | 3                           |                        | 2                     | 2                           |                        | 1                     | 1                           |                        |
| Deformity                   | 7                     | 12                          |                        | 5                     | 5                           |                        | 5                     | 6                           |                        |
| Decreased ROM               | 26                    | 32                          |                        | 16                    | 17                          |                        | 14                    | 14                          |                        |
| Neurologic                  | 43 (4.5%)             | 35 (1.5%)                   | < 0.0001               | 23 (2.7%)             | 16 (0.7%)                   | 0.001                  | 13 (1.5%)             | 13 (0.6%)                   | 0.182                  |
| Cognition                   | 3                     | 0                           |                        | 2                     | 0                           |                        | 1                     | 1                           |                        |
| Speech                      | 7                     | 4                           |                        | 5                     | 1                           |                        | 2                     | 1                           |                        |
| Tremor                      | 9                     | 4                           |                        | 6                     | 0                           |                        | 1                     | 1                           |                        |
| Reflexes                    | 14                    | 16                          |                        | 4                     | 4                           |                        | 1                     | 4                           |                        |
| Cranial Nerve(s)            | 7                     | 2                           |                        | 2                     | 1                           |                        | 1                     | 1                           |                        |
| Focal Weakness              | 1                     | 1                           |                        | 1                     | 0                           |                        | 1                     | 0                           |                        |
| Gait/Balance                | 7                     | 21                          |                        | 8                     | 13                          |                        | 10                    | 9                           |                        |
| Sensory                     | 2                     | 0                           |                        | 0                     | 0                           |                        | 0                     | 0                           |                        |
| Skin                        | 93 (9.6%)             | 173 (7.4%)                  | 0.001                  | 43 (5.1%)             | 82 (3.8%)                   | 0.042                  | 36 (4.2%)             | 92 (4.5%)                   | 0.904                  |
| Rash                        | 43                    | 86                          |                        | 21                    | 39                          |                        | 14                    | 44                          |                        |
| Skin: Mass                  | 4                     | 9                           |                        | 5                     | 2                           |                        | 0                     | 1                           |                        |
| Lesion                      | 22                    | 28                          |                        | 6                     | 11                          |                        | 6                     | 14                          |                        |
| Jaundice                    | 1                     | 1                           |                        | 0                     | 0                           |                        | 0                     | 0                           |                        |
| Pigmentation                | 39                    | 68                          |                        | 17                    | 34                          |                        | 17                    | 40                          |                        |
| Breast                      | 14 (1.7%)             | 56 (2.4%)                   | 0.504                  | 15 (1.8%)             | 30 (1.4%)                   | 0.358                  | 12 (1.4%)             | 26 (1.3%)                   | 0.725                  |
| Breast: Mass                | 2                     | 3                           |                        | 1                     | 1                           |                        | 1                     | 0                           |                        |
| Nipple Discharge            | 12                    | 53                          |                        | 14                    | 29                          |                        | 11                    | 26                          |                        |

Table S8: Summary of physical exam findings for survivors and close contacts enrolled in PREVAIL III. The test statistics control for age, gender, site and relationships among survivors and close contacts.

3.12 Table S9

|                       | Baseline Visit       |                        |                        |                        | 6 Month Visit        |                         |                       |                         | 12 Month Visit        |                        |                      |                        |
|-----------------------|----------------------|------------------------|------------------------|------------------------|----------------------|-------------------------|-----------------------|-------------------------|-----------------------|------------------------|----------------------|------------------------|
|                       | Survivor             |                        | Contact                |                        | Survivor             |                         | Contact               |                         | Survivor              |                        | Contact              |                        |
|                       | App < 18<br>(N=225)  | App > 18<br>(N=761)    | App < 18<br>(N=649)    | App > 18<br>(N=1500)   | App < 18<br>(N=180)  | App > 18<br>(N=670)     | App < 18<br>(N=765)   | App > 18<br>(N=1338)    | App < 18<br>(N=185)   | App > 18<br>(N=675)    | App < 18<br>(N=769)  | App > 18<br>(N=1287)   |
| <b>Renal Function</b> |                      |                        |                        |                        |                      |                         |                       |                         |                       |                        |                      |                        |
| Serum creatinine      | 0.64 (0.54, 0.74)    | 0.93 (0.8, 1.09)       | 0.61 (0.5, 0.72)       | 0.88 (0.75, 1.04)      | 0.63 (0.54, 0.74)    | 0.93 (0.8, 1.1)         | 0.61 (0.5, 0.73)      | 0.9 (0.76, 1.05)        | 0.63 (0.53, 0.74)     | 0.9 (0.76, 1.05)       | 0.65 (0.54, 0.77)    | 0.93 (0.79, 1.07)      |
| eGFR <sup>cr</sup>    | 88.3 (76.27, 100.56) | 104.96 (89.85, 122.15) | 90.46 (80.88, 102.96)  | 111.58 (95.33, 128.6)  | 88.01 (80.47, 99.59) | 105.09 (89.89, 121.7)   | 90.08 (79.15, 103.78) | 109.44 (94.03, 128.45)  | 88.93 (79.41, 103.94) | 107.33 (92.15, 127.54) | 84.12 (74.81, 94.76) | 106.34 (91.49, 124.02) |
| eGFR <sup>cys</sup>   | 3 (0.02)             | 12 (0.02)              | 17 (0.02)              | 22 (0.01)              | 2 (0.01)             | 13 (0.02)               | 13 (0.02)             | 20 (0.01)               | 1 (0.01)              | 8 (0.01)               | 19 (0.03)            | 21 (0.02)              |
| <b>Hematology</b>     |                      |                        |                        |                        |                      |                         |                       |                         |                       |                        |                      |                        |
| Total bilirubin       | 0.5 (0.4, 0.7)       | 0.7 (0.5, 0.9)         | 0.5 (0.4, 0.7)         | 0.7 (0.5, 0.9)         | 0.5 (0.4, 0.7)       | 0.7 (0.5, 0.9)          | 0.5 (0.4, 0.7)        | 0.7 (0.5, 0.9)          | 0.5 (0.4, 0.7)        | 0.7 (0.5, 0.9)         | 0.5 (0.4, 0.7)       | 0.7 (0.5, 1)           |
| AST                   | 16 (13, 21)          | 12 (9, 18)             | 18 (13, 22)            | 13 (10, 17)            | 15 (13, 20)          | 12 (9, 16)              | 17 (13, 21)           | 19 (16, 17)             | 15 (12, 20)           | 12 (9, 16)             | 16 (12, 21)          | 12 (9, 17)             |
| ALT                   | 6 (4, 10)            | 7 (3, 13)              | 6 (4, 10)              | 7 (4, 12)              | 5 (3, 8)             | 7 (3, 12)               | 6 (4, 10)             | 7 (4, 12)               | 6 (3, 9)              | 7 (3, 13)              | 6 (3, 9)             | 7 (4, 11)              |
| APRI > 0.7            | 0.11 (0.01, 0.19)    | 0.14 (0.01, 0.21)      | 0.16 (0.01, 0.21)      | 0.17 (0.01, 0.22)      | 0.11 (0.01, 0.19)    | 0.17 (0.01, 0.22)       | 0.17 (0.01, 0.21)     | 0.17 (0.01, 0.21)       | 0.11 (0.01, 0.2)      | 0.17 (0.01, 0.19)      | 0.11 (0.01, 0.2)     | 0.14 (0.01, 0.21)      |
| <b>Hematology</b>     |                      |                        |                        |                        |                      |                         |                       |                         |                       |                        |                      |                        |
| d-Dimer               | 0.39 (0.29, 0.5)     | 0.39 (0.27, 0.64)      | 0.42 (0.29, 0.65)      | 0.45 (0.27, 0.7)       | 0.46 (0.33, 0.66)    | 0.48 (0.29, 0.74)       | 0.44 (0.28, 0.67)     | 0.43 (0.27, 0.71)       | 0.29 (0.2, 0.46)      | 0.35 (0.27, 0.59)      | 0.48 (0.32, 0.69)    | 0.46 (0.29, 0.7)       |
| Prothrombin time      | 37.59 (33.34, 40.71) | 42.17 (39, 44.19)      | 36.13 (33, 39)         | 40.6 (37.98, 44.57)    | 35.13 (32, 37.9)     | 39.13 (35.2, 42.9)      | 37.73 (33, 39)        | 39.43 (35.2, 44.3)      | 36.66 (33.44, 39.32)  | 40.12 (35.98, 43.65)   | 36.81 (33.39, 39.27) | 39.15 (36.55, 42.94)   |
| Platelet count        | 253.9 (240.8, 373.9) | 237.9 (199.8, 284.8)   | 289.8 (240.38, 350.07) | 234.65 (195.9, 280.68) | 292 (236.75, 367.6)  | 230.86 (192.55, 275.15) | 275 (227.4, 338.5)    | 232.65 (192.72, 273.86) | 276.1 (226.7, 343.6)  | 232.2 (194.7, 276.65)  | 266.1 (219.1, 329.7) | 225.6 (186.55, 267.55) |

Table S9: Laboratory results (medians and quartiles for continuous variables and counts and percents for binary variables) for survivors and close contacts separated by age.

# 4 CASE REPORT FORMS

## Enrollment: EVD Survivors

Attach a PID label here:

Enrollment Date:  
(example: 01-SEP-2015)

|                      |                      |                      |                      |                      |                      |                      |                      |                      |                      |
|----------------------|----------------------|----------------------|----------------------|----------------------|----------------------|----------------------|----------------------|----------------------|----------------------|
| <input type="text"/> |
| Day                  |                      | Month                |                      | Year                 |                      |                      |                      |                      |                      |

Participant Initials:

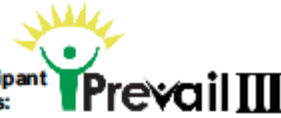

Complete this form for survivors of Ebola enrolled in the PREVAIL III: Ebola Natural History Study. If the volunteer is <12 years old, also complete the Pediatric Supplement form.

### A. Inclusion criteria (all must be marked "Yes" for participant to be eligible)

- In a volunteer of any age, documentation of EVD in the past 2 years based on The Ministry of Health Registry of EVD Survivors.
- Willingness to participate in examinations at one of the participating health facilities.
- Willingness to provide informed consent/assent.

| No                         | Yes                        |
|----------------------------|----------------------------|
| 0 <input type="checkbox"/> | 1 <input type="checkbox"/> |
| 0 <input type="checkbox"/> | 1 <input type="checkbox"/> |
| 0 <input type="checkbox"/> | 1 <input type="checkbox"/> |

### B. Exclusion Criterion (must be marked "No" for volunteer to be eligible)

- Any condition, in the judgement of study staff, that would make the volunteer unable to participate in the study.

| No                         | Yes                        |
|----------------------------|----------------------------|
| 0 <input type="checkbox"/> | 1 <input type="checkbox"/> |

### C. Enrollment Documentation

Check if completed

- Consent form was signed and dated. 1
- Volunteer received copy of consent. 1

### D. EVD History - self-reported

- When did the volunteer develop symptoms of Ebola?         (example: JUL-2015) (Estimate the date, if exact date is unknown)

#### 2. Was the volunteer treated in a:

Record name of center

- |                                |                               |                                  |       |
|--------------------------------|-------------------------------|----------------------------------|-------|
| a. Ebola Treatment Unit (ETU)  | 0 <input type="checkbox"/> No | 1 <input type="checkbox"/> Yes → | _____ |
| b. Transit Unit (TU)           | 0 <input type="checkbox"/> No | 1 <input type="checkbox"/> Yes → | _____ |
| c. Hospital                    | 0 <input type="checkbox"/> No | 1 <input type="checkbox"/> Yes → | _____ |
| d. Community Care Center (CCC) | 0 <input type="checkbox"/> No | 1 <input type="checkbox"/> Yes → | _____ |

Note: also complete EVD Documentation form.

#### 3. What was the total length of stay in treatment center(s)?

- |                                     |                                       |
|-------------------------------------|---------------------------------------|
| 1 <input type="checkbox"/> < 2 days | 4 <input type="checkbox"/> 10-14 days |
| 2 <input type="checkbox"/> 2-5 days | 5 <input type="checkbox"/> > 14 days  |
| 3 <input type="checkbox"/> 6-9 days |                                       |

#### 4. Were any of the volunteer's household members diagnosed with Ebola?

0  No

1  Yes →

5. Mark all that apply:

1  Spouse/partner

1  Parent

1  Other, specify: \_\_\_\_\_

1  Sibling

1  Child

# Enrollment: EVD Survivors

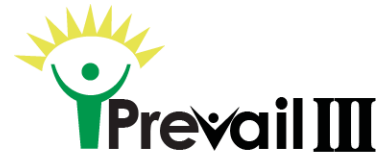

Attach a PID label here:

6. What was the likely source of the volunteer's Ebola infection?

- 1  Contact with family or household members
- 2  Job related →
- 3  Other; specify:  
\_\_\_\_\_
- 4  Unknown

7. What best describes the volunteer's role at that time?

- |                                                   |                                              |                                                      |
|---------------------------------------------------|----------------------------------------------|------------------------------------------------------|
| 01 <input type="checkbox"/> Doctor                | 05 <input type="checkbox"/> Cleaner          | 09 <input type="checkbox"/> Ambulance driver         |
| 02 <input type="checkbox"/> Physician's assistant | 06 <input type="checkbox"/> Laboratory       | 10 <input type="checkbox"/> Other; specify:<br>_____ |
| 03 <input type="checkbox"/> Nurse                 | 07 <input type="checkbox"/> Transporter      |                                                      |
| 04 <input type="checkbox"/> Nursing assistant     | 08 <input type="checkbox"/> Safe burial team |                                                      |

8. What symptoms (self-reported) did the volunteer experience at the time of diagnosis or during the hospitalization/ETU stay?

- |                         |                               |                                |                            |                               |                                |
|-------------------------|-------------------------------|--------------------------------|----------------------------|-------------------------------|--------------------------------|
| a. Fever                | 0 <input type="checkbox"/> No | 1 <input type="checkbox"/> Yes | i. Myalgia (muscle pain)   | 0 <input type="checkbox"/> No | 1 <input type="checkbox"/> Yes |
| b. Loss of appetite     | 0 <input type="checkbox"/> No | 1 <input type="checkbox"/> Yes | j. Arthralgia (joint pain) | 0 <input type="checkbox"/> No | 1 <input type="checkbox"/> Yes |
| c. Nausea               | 0 <input type="checkbox"/> No | 1 <input type="checkbox"/> Yes | k. Breathing difficulties  | 0 <input type="checkbox"/> No | 1 <input type="checkbox"/> Yes |
| d. Vomiting             | 0 <input type="checkbox"/> No | 1 <input type="checkbox"/> Yes | l. Shortness of breath     | 0 <input type="checkbox"/> No | 1 <input type="checkbox"/> Yes |
| e. Diarrhea             | 0 <input type="checkbox"/> No | 1 <input type="checkbox"/> Yes | m. Hiccups                 | 0 <input type="checkbox"/> No | 1 <input type="checkbox"/> Yes |
| f. Headache             | 0 <input type="checkbox"/> No | 1 <input type="checkbox"/> Yes | n. Red eyes                | 0 <input type="checkbox"/> No | 1 <input type="checkbox"/> Yes |
| g. Abdominal pain       | 0 <input type="checkbox"/> No | 1 <input type="checkbox"/> Yes | o. Fatigue                 | 0 <input type="checkbox"/> No | 1 <input type="checkbox"/> Yes |
| h. Unexplained bleeding | 0 <input type="checkbox"/> No | 1 <input type="checkbox"/> Yes | p. Sore throat             | 0 <input type="checkbox"/> No | 1 <input type="checkbox"/> Yes |

9. Ask the volunteer, "Did you develop eye problems while you were sick with Ebola or after you recovered from Ebola?"

- |                  |                               |                                |                         |                               |                                |                          |                               |                                |
|------------------|-------------------------------|--------------------------------|-------------------------|-------------------------------|--------------------------------|--------------------------|-------------------------------|--------------------------------|
| a. Blurry vision | 0 <input type="checkbox"/> No | 1 <input type="checkbox"/> Yes | c. Sensitivity to light | 0 <input type="checkbox"/> No | 1 <input type="checkbox"/> Yes | e. Discharge from eye    | 0 <input type="checkbox"/> No | 1 <input type="checkbox"/> Yes |
| b. Pain in eye   | 0 <input type="checkbox"/> No | 1 <input type="checkbox"/> Yes | d. Eye redness          | 0 <input type="checkbox"/> No | 1 <input type="checkbox"/> Yes | f. Other; specify: _____ | 0 <input type="checkbox"/> No | 1 <input type="checkbox"/> Yes |

10. Since recovery from Ebola, has the volunteer been hospitalized?

- 0  No
- 1  Yes →

11. Reason: \_\_\_\_\_

12. Date of admission:    -

(example: JUL-2015)

Month                      Year

(If multiple, record first hospitalization after discharge from ETU. Estimate the date, if the exact date is unknown)

# Enrollment: EVD Survivors

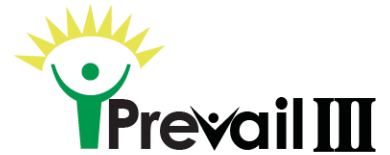

Attach a PID label here:

13. Since the Ebola event, has the volunteer experienced a pregnancy? (include pregnancy at the time of the EVD event, if applicable)

0  No or not applicable → **Go to Section E.**

1  Yes

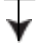

14. Number of pregnancies since Ebola:  (Include pregnancy at the time of the EVD event, if applicable)

0  No

15. Was the volunteer pregnant at the time of EVD event? 1  Yes

Answer the following questions for each pregnancy.

a. 1st pregnancy

b. 2nd pregnancy

c. 3rd pregnancy

16. Outcome of pregnancy:

1  Still pregnant

2  Live birth

3  Live birth with subsequent infant death

4  Still birth/intrauterine fetal demise (IUFD ≥ 20 weeks)

5  Spontaneous abortion (IUFD < 20 weeks)

6  Induced abortion

7  Other; specify:

1  Still pregnant

2  Live birth

3  Live birth with subsequent infant death

4  Still birth/intrauterine fetal demise (IUFD ≥ 20 weeks)

5  Spontaneous abortion (IUFD < 20 weeks)

6  Induced abortion

7  Other; specify:

1  Still pregnant

2  Live birth

3  Live birth with subsequent infant death

4  Still birth/intrauterine fetal demise (IUFD ≥ 20 weeks)

5  Spontaneous abortion (IUFD < 20 weeks)

6  Induced abortion

7  Other; specify:

17. Any medical problems with the fetus or infant?

0  No

1  Yes, specify:

0  No

1  Yes, specify:

0  No

1  Yes, specify:

## E. Sexual History

**Sexual contacts (since the EVD event) may be invited to participate in this study (have antibody testing) if they are not also EVD survivors. Ask if the volunteer is willing to provide this information.**

1. Excluding other survivors, has the volunteer had any sexual partners since the EVD event?

0  No or not applicable

1  Volunteer prefers not to provide information → **Go to Section F.**

2  Yes → **Close Contacts Form should be completed when the volunteer is willing to provide the names.**

# Enrollment: EVD Survivors



Attach a PID label here:

## F. Stigma and Discrimination - complete for volunteers $\geq 12$ years of age.

Read the following questions to the volunteer and ask which apply to their experience.

|                                                                                                   | No                         | Yes                        |
|---------------------------------------------------------------------------------------------------|----------------------------|----------------------------|
| 1. Forced to change residence because of social alienation from family and/or friends.            | 0 <input type="checkbox"/> | 1 <input type="checkbox"/> |
| 2. Lost a job or another source of income because of being infected.                              | 0 <input type="checkbox"/> | 1 <input type="checkbox"/> |
| 3. Lost a spouse because of fear of being infected from personal interaction.                     | 0 <input type="checkbox"/> | 1 <input type="checkbox"/> |
| 4. Deprived from attending gathering (e.g., school, church, social) for fear of infecting others. | 0 <input type="checkbox"/> | 1 <input type="checkbox"/> |
| 5. Isolated yourself from family and/or friends.                                                  | 0 <input type="checkbox"/> | 1 <input type="checkbox"/> |
| 6. Withdrew from education/training or did not take up an opportunity for education/training.     | 0 <input type="checkbox"/> | 1 <input type="checkbox"/> |
| 7. Afraid that someone would not want to be sexually intimate with you as a survivor.             | 0 <input type="checkbox"/> | 1 <input type="checkbox"/> |

## G. Specimen Documentation

**Note: Blood samples are optional for volunteers < 12 years of age.**

1. Were the following specimens obtained:

a. Blood      0  No    1  Yes →

b. Urine      0  No    1  Yes →

**Kit Number Label here:**

Place 2nd Kit Number label here, if a 2nd kit is used:

2. Has the volunteer had anything to eat or drink (other than water) in the past 8 hours?

0  No

1  Yes

Signature: \_\_\_\_\_ Date: \_\_\_\_\_

# EVD Documentation

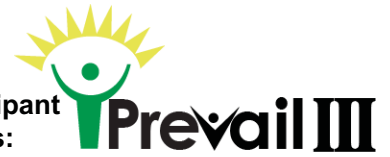

Attach a PID label here:

**Enrollment Date:**

(example: 01-JAN-2016)

|     |  |       |  |  |      |  |  |  |  |
|-----|--|-------|--|--|------|--|--|--|--|
|     |  |       |  |  |      |  |  |  |  |
| Day |  | Month |  |  | Year |  |  |  |  |

**Participant Initials:** \_\_\_\_\_

**Complete this form using Ministry of Health data and any other available documentation of the volunteer's EVD event. Check unknown for any answer that is not known.**

1. Is any documentation of the volunteer's EVD event available?

- 0  No → **Stop here. Sign form and submit.**  
 1  Yes → **Provide any information below that is available.**

2. Was the volunteer treated in an Ebola Treatment Unit (ETU)?

- 0  No  
 1  Yes →  
 2  Unknown

3. Name of ETU: \_\_\_\_\_

4. Date of admission:  
 (example: 01-JAN-2016)

|     |  |       |  |  |      |  |  |  |  |
|-----|--|-------|--|--|------|--|--|--|--|
|     |  |       |  |  |      |  |  |  |  |
| Day |  | Month |  |  | Year |  |  |  |  |

OR 1  Date unknown

5. Date of discharge:  
 (example: 01-JAN-2016)

|     |  |       |  |  |      |  |  |  |  |
|-----|--|-------|--|--|------|--|--|--|--|
|     |  |       |  |  |      |  |  |  |  |
| Day |  | Month |  |  | Year |  |  |  |  |

OR 1  Date unknown

Note: Give date of first admission and last discharge if volunteer had multiple admissions.

6. Was the volunteer treated in a Transit Unit (TU)?

- 0  No  
 1  Yes →  
 2  Unknown

7. Name of TU: \_\_\_\_\_

8. Date of admission:  
 (example: 01-JAN-2016)

|     |  |       |  |  |      |  |  |  |  |
|-----|--|-------|--|--|------|--|--|--|--|
|     |  |       |  |  |      |  |  |  |  |
| Day |  | Month |  |  | Year |  |  |  |  |

OR 1  Date unknown

9. Date of discharge:  
 (example: 01-JAN-2016)

|     |  |       |  |  |      |  |  |  |  |
|-----|--|-------|--|--|------|--|--|--|--|
|     |  |       |  |  |      |  |  |  |  |
| Day |  | Month |  |  | Year |  |  |  |  |

OR 1  Date unknown

Note: Give date of first admission and last discharge if volunteer had multiple admissions.

10. Diagnosis certainty (Mark first that applies):

- 1  Confirmed, positive PCR      3  Probable, no test results available  
 2  Confirmed, positive ELISA

11. Are any blood RT-PCR test results available?

- 0  No  
 1  Yes →

| Provide any details available.                                                                                                                                                                                                                                                                                                                                                                                                                                                                                                                                                                        |  | Record if positive:                                                                                                                                                                                                        |  |  |      |  |  |  |  |  |     |  |       |  |  |      |  |  |  |  |                                     |
|-------------------------------------------------------------------------------------------------------------------------------------------------------------------------------------------------------------------------------------------------------------------------------------------------------------------------------------------------------------------------------------------------------------------------------------------------------------------------------------------------------------------------------------------------------------------------------------------------------|--|----------------------------------------------------------------------------------------------------------------------------------------------------------------------------------------------------------------------------|--|--|------|--|--|--|--|--|-----|--|-------|--|--|------|--|--|--|--|-------------------------------------|
| a. Date of blood draw*<br>(example: 01-JAN-2016)                                                                                                                                                                                                                                                                                                                                                                                                                                                                                                                                                      |  |                                                                                                                                                                                                                            |  |  |      |  |  |  |  |  |     |  |       |  |  |      |  |  |  |  |                                     |
| 12. <table border="1"> <tr> <td style="width: 20px; height: 20px;"></td> </tr> <tr> <td colspan="2">Day</td> <td colspan="3">Month</td> <td colspan="5">Year</td> </tr> </table> |  |                                                                                                                                                                                                                            |  |  |      |  |  |  |  |  | Day |  | Month |  |  | Year |  |  |  |  | b. Result                           |
|                                                                                                                                                                                                                                                                                                                                                                                                                                                                                                                                                                                                       |  |                                                                                                                                                                                                                            |  |  |      |  |  |  |  |  |     |  |       |  |  |      |  |  |  |  |                                     |
| Day                                                                                                                                                                                                                                                                                                                                                                                                                                                                                                                                                                                                   |  | Month                                                                                                                                                                                                                      |  |  | Year |  |  |  |  |  |     |  |       |  |  |      |  |  |  |  |                                     |
| OR 1 <input type="checkbox"/> Date unknown                                                                                                                                                                                                                                                                                                                                                                                                                                                                                                                                                            |  | 0 <input type="checkbox"/> Negative                                                                                                                                                                                        |  |  |      |  |  |  |  |  |     |  |       |  |  |      |  |  |  |  |                                     |
| 13. <table border="1"> <tr> <td style="width: 20px; height: 20px;"></td> </tr> <tr> <td colspan="2">Day</td> <td colspan="3">Month</td> <td colspan="5">Year</td> </tr> </table> |  |                                                                                                                                                                                                                            |  |  |      |  |  |  |  |  | Day |  | Month |  |  | Year |  |  |  |  | 1 <input type="checkbox"/> Positive |
|                                                                                                                                                                                                                                                                                                                                                                                                                                                                                                                                                                                                       |  |                                                                                                                                                                                                                            |  |  |      |  |  |  |  |  |     |  |       |  |  |      |  |  |  |  |                                     |
| Day                                                                                                                                                                                                                                                                                                                                                                                                                                                                                                                                                                                                   |  | Month                                                                                                                                                                                                                      |  |  | Year |  |  |  |  |  |     |  |       |  |  |      |  |  |  |  |                                     |
| OR 1 <input type="checkbox"/> Date unknown                                                                                                                                                                                                                                                                                                                                                                                                                                                                                                                                                            |  | 0 <input type="checkbox"/> Negative                                                                                                                                                                                        |  |  |      |  |  |  |  |  |     |  |       |  |  |      |  |  |  |  |                                     |
| 14. <table border="1"> <tr> <td style="width: 20px; height: 20px;"></td> </tr> <tr> <td colspan="2">Day</td> <td colspan="3">Month</td> <td colspan="5">Year</td> </tr> </table> |  |                                                                                                                                                                                                                            |  |  |      |  |  |  |  |  | Day |  | Month |  |  | Year |  |  |  |  | 1 <input type="checkbox"/> Positive |
|                                                                                                                                                                                                                                                                                                                                                                                                                                                                                                                                                                                                       |  |                                                                                                                                                                                                                            |  |  |      |  |  |  |  |  |     |  |       |  |  |      |  |  |  |  |                                     |
| Day                                                                                                                                                                                                                                                                                                                                                                                                                                                                                                                                                                                                   |  | Month                                                                                                                                                                                                                      |  |  | Year |  |  |  |  |  |     |  |       |  |  |      |  |  |  |  |                                     |
| OR 1 <input type="checkbox"/> Date unknown                                                                                                                                                                                                                                                                                                                                                                                                                                                                                                                                                            |  | 0 <input type="checkbox"/> Negative                                                                                                                                                                                        |  |  |      |  |  |  |  |  |     |  |       |  |  |      |  |  |  |  |                                     |
| 15. <table border="1"> <tr> <td style="width: 20px; height: 20px;"></td> </tr> <tr> <td colspan="2">Day</td> <td colspan="3">Month</td> <td colspan="5">Year</td> </tr> </table> |  |                                                                                                                                                                                                                            |  |  |      |  |  |  |  |  | Day |  | Month |  |  | Year |  |  |  |  | 1 <input type="checkbox"/> Positive |
|                                                                                                                                                                                                                                                                                                                                                                                                                                                                                                                                                                                                       |  |                                                                                                                                                                                                                            |  |  |      |  |  |  |  |  |     |  |       |  |  |      |  |  |  |  |                                     |
| Day                                                                                                                                                                                                                                                                                                                                                                                                                                                                                                                                                                                                   |  | Month                                                                                                                                                                                                                      |  |  | Year |  |  |  |  |  |     |  |       |  |  |      |  |  |  |  |                                     |
| OR 1 <input type="checkbox"/> Date unknown                                                                                                                                                                                                                                                                                                                                                                                                                                                                                                                                                            |  | 0 <input type="checkbox"/> Negative                                                                                                                                                                                        |  |  |      |  |  |  |  |  |     |  |       |  |  |      |  |  |  |  |                                     |
|                                                                                                                                                                                                                                                                                                                                                                                                                                                                                                                                                                                                       |  | 1 <input type="checkbox"/> Positive                                                                                                                                                                                        |  |  |      |  |  |  |  |  |     |  |       |  |  |      |  |  |  |  |                                     |
|                                                                                                                                                                                                                                                                                                                                                                                                                                                                                                                                                                                                       |  | c. Ct value                                                                                                                                                                                                                |  |  |      |  |  |  |  |  |     |  |       |  |  |      |  |  |  |  |                                     |
|                                                                                                                                                                                                                                                                                                                                                                                                                                                                                                                                                                                                       |  | <table border="1"> <tr> <td style="width: 20px; height: 20px;"></td> </tr> </table> |  |  |      |  |  |  |  |  |     |  |       |  |  |      |  |  |  |  |                                     |
|                                                                                                                                                                                                                                                                                                                                                                                                                                                                                                                                                                                                       |  |                                                                                                                                                                                                                            |  |  |      |  |  |  |  |  |     |  |       |  |  |      |  |  |  |  |                                     |
|                                                                                                                                                                                                                                                                                                                                                                                                                                                                                                                                                                                                       |  | OR 1 <input type="checkbox"/> Unknown                                                                                                                                                                                      |  |  |      |  |  |  |  |  |     |  |       |  |  |      |  |  |  |  |                                     |
|                                                                                                                                                                                                                                                                                                                                                                                                                                                                                                                                                                                                       |  | <table border="1"> <tr> <td style="width: 20px; height: 20px;"></td> </tr> </table> |  |  |      |  |  |  |  |  |     |  |       |  |  |      |  |  |  |  |                                     |
|                                                                                                                                                                                                                                                                                                                                                                                                                                                                                                                                                                                                       |  |                                                                                                                                                                                                                            |  |  |      |  |  |  |  |  |     |  |       |  |  |      |  |  |  |  |                                     |
|                                                                                                                                                                                                                                                                                                                                                                                                                                                                                                                                                                                                       |  | OR 1 <input type="checkbox"/> Unknown                                                                                                                                                                                      |  |  |      |  |  |  |  |  |     |  |       |  |  |      |  |  |  |  |                                     |
|                                                                                                                                                                                                                                                                                                                                                                                                                                                                                                                                                                                                       |  | <table border="1"> <tr> <td style="width: 20px; height: 20px;"></td> </tr> </table> |  |  |      |  |  |  |  |  |     |  |       |  |  |      |  |  |  |  |                                     |
|                                                                                                                                                                                                                                                                                                                                                                                                                                                                                                                                                                                                       |  |                                                                                                                                                                                                                            |  |  |      |  |  |  |  |  |     |  |       |  |  |      |  |  |  |  |                                     |
|                                                                                                                                                                                                                                                                                                                                                                                                                                                                                                                                                                                                       |  | OR 1 <input type="checkbox"/> Unknown                                                                                                                                                                                      |  |  |      |  |  |  |  |  |     |  |       |  |  |      |  |  |  |  |                                     |
|                                                                                                                                                                                                                                                                                                                                                                                                                                                                                                                                                                                                       |  | <table border="1"> <tr> <td style="width: 20px; height: 20px;"></td> </tr> </table> |  |  |      |  |  |  |  |  |     |  |       |  |  |      |  |  |  |  |                                     |
|                                                                                                                                                                                                                                                                                                                                                                                                                                                                                                                                                                                                       |  |                                                                                                                                                                                                                            |  |  |      |  |  |  |  |  |     |  |       |  |  |      |  |  |  |  |                                     |
|                                                                                                                                                                                                                                                                                                                                                                                                                                                                                                                                                                                                       |  | OR 1 <input type="checkbox"/> Unknown                                                                                                                                                                                      |  |  |      |  |  |  |  |  |     |  |       |  |  |      |  |  |  |  |                                     |

Signature: \_\_\_\_\_ Date: \_\_\_\_\_



# Close Contacts



Attach a PID label here:

Date Form Completed:

(example: 01-SEP-2015)

|     |  |       |  |  |      |  |  |  |  |
|-----|--|-------|--|--|------|--|--|--|--|
|     |  |       |  |  |      |  |  |  |  |
| Day |  | Month |  |  | Year |  |  |  |  |

Participant Initials: \_\_\_\_\_

Complete this form for each participating Ebola survivor to document close contact with individuals who may be invited to participate in this study. This information is confidential and will not be disclosed to anyone outside of the study. Upon consent, they will be assessed and tested to evaluate their health. The findings from their exams will be compared to EVD survivors to assess the difference.

1. Does the survivor wish to report any close contacts (household or sexual) who may be willing to participate in this study?

0  No → Sign and date this form, and submit.

1  Yes → Complete questions 2 and/or 3.

2. Ask for the names of up to 5 household contacts who lived with the volunteer at the time of the Ebola event or since the Ebola event. Only list contacts who are living, and who did not become infected with Ebola. For each, indicate their relationship to the survivor. Choose the 5 closest contacts (e.g., shared bedroom, meals, etc.)

| Name     | Relationship                                                                                                                                                         |                                                  |
|----------|----------------------------------------------------------------------------------------------------------------------------------------------------------------------|--------------------------------------------------|
| a. _____ | 1 <input type="checkbox"/> Spouse/partner    3 <input type="checkbox"/> Child<br>2 <input type="checkbox"/> Parent                4 <input type="checkbox"/> Sibling | 5 <input type="checkbox"/> Other; specify: _____ |
| b. _____ | 1 <input type="checkbox"/> Spouse/partner    3 <input type="checkbox"/> Child<br>2 <input type="checkbox"/> Parent                4 <input type="checkbox"/> Sibling | 5 <input type="checkbox"/> Other; specify: _____ |
| c. _____ | 1 <input type="checkbox"/> Spouse/partner    3 <input type="checkbox"/> Child<br>2 <input type="checkbox"/> Parent                4 <input type="checkbox"/> Sibling | 5 <input type="checkbox"/> Other; specify: _____ |
| d. _____ | 1 <input type="checkbox"/> Spouse/partner    3 <input type="checkbox"/> Child<br>2 <input type="checkbox"/> Parent                4 <input type="checkbox"/> Sibling | 5 <input type="checkbox"/> Other; specify: _____ |
| e. _____ | 1 <input type="checkbox"/> Spouse/partner    3 <input type="checkbox"/> Child<br>2 <input type="checkbox"/> Parent                4 <input type="checkbox"/> Sibling | 5 <input type="checkbox"/> Other; specify: _____ |

3. List sexual contacts since being diagnosed with Ebola. For each, indicate the current status and history of condom use. Do not include contacts who have had Ebola.

| Name     | Current partner                                                 | History of condom use            |                                      |                                   |
|----------|-----------------------------------------------------------------|----------------------------------|--------------------------------------|-----------------------------------|
| a. _____ | 0 <input type="checkbox"/> No<br>1 <input type="checkbox"/> Yes | 0 <input type="checkbox"/> Never | 1 <input type="checkbox"/> Sometimes | 2 <input type="checkbox"/> Always |
| b. _____ | 0 <input type="checkbox"/> No<br>1 <input type="checkbox"/> Yes | 0 <input type="checkbox"/> Never | 1 <input type="checkbox"/> Sometimes | 2 <input type="checkbox"/> Always |
| c. _____ | 0 <input type="checkbox"/> No<br>1 <input type="checkbox"/> Yes | 0 <input type="checkbox"/> Never | 1 <input type="checkbox"/> Sometimes | 2 <input type="checkbox"/> Always |
| d. _____ | 0 <input type="checkbox"/> No<br>1 <input type="checkbox"/> Yes | 0 <input type="checkbox"/> Never | 1 <input type="checkbox"/> Sometimes | 2 <input type="checkbox"/> Always |

Signature: \_\_\_\_\_ Date: \_\_\_\_\_

# Enrollment: Close Contacts



Attach a PID label here:

**Enrollment Date:**  
(example: 01-SEP-2015)

|     |  |       |  |  |      |  |  |  |  |  |
|-----|--|-------|--|--|------|--|--|--|--|--|
|     |  |       |  |  |      |  |  |  |  |  |
| Day |  | Month |  |  | Year |  |  |  |  |  |

**Participant Initials:**

\_\_\_\_\_

Complete this form for close contacts of Ebola survivors enrolled in the PREVAIL III: Ebola Natural History Study. If the volunteer is < 12 years old, also complete the Pediatric Supplement form.

**A. Inclusion Criteria (all must be marked "Yes" for volunteer to be eligible)**

1. Willingness to participate in examinations at one of the participating health facilities.
2. Willingness to provide informed consent/assent.
3. Was named by a participating survivor as one of the following:
  - Household contact at the time of or since the EVD event.
  - Sexual contact since being diagnosed with EVD.

| <u>No</u>                  | <u>Yes</u>                 |
|----------------------------|----------------------------|
| 0 <input type="checkbox"/> | 1 <input type="checkbox"/> |
| 0 <input type="checkbox"/> | 1 <input type="checkbox"/> |
| 0 <input type="checkbox"/> | 1 <input type="checkbox"/> |

**B. Exclusion Criteria (all must be marked "No" for volunteer to be eligible)**

1. History of EVD
2. Any condition, in the judgement of study staff, that would make the volunteer unable to participate in this study.

| <u>No</u>                  | <u>Yes</u>                 |
|----------------------------|----------------------------|
| 0 <input type="checkbox"/> | 1 <input type="checkbox"/> |
| 0 <input type="checkbox"/> | 1 <input type="checkbox"/> |

**C. Enrollment Documentation**

**Check if completed**

1. Consent form was signed and dated. 1
2. Volunteer received copy of consent. 1

**D. Nature of Contact**

1. Close contact of:  Record PREVAIL III PID of associated survivor.

2. The survivor above is this volunteer's:

- |                                                 |                                                  |
|-------------------------------------------------|--------------------------------------------------|
| 1 <input type="checkbox"/> Spouse or partner    | 4 <input type="checkbox"/> Child                 |
| 2 <input type="checkbox"/> Other sexual contact | 5 <input type="checkbox"/> Sibling               |
| 3 <input type="checkbox"/> Parent               | 6 <input type="checkbox"/> Other; specify: _____ |

3. Was the volunteer living in the same household as the survivor when the survivor developed Ebola?

0  No → **Go to Question 6.**

1  Yes → **Ask the volunteer,**

4. "For each item below, indicate the nature of your contact with the survivor at the time of the Ebola event."

|                                             | <u>No</u>                  | <u>Yes</u>                 |
|---------------------------------------------|----------------------------|----------------------------|
| a. Contact with body fluid                  | 0 <input type="checkbox"/> | 1 <input type="checkbox"/> |
| b. Slept or ate in same room                | 0 <input type="checkbox"/> | 1 <input type="checkbox"/> |
| c. Contact with clothing                    | 0 <input type="checkbox"/> | 1 <input type="checkbox"/> |
| d. Direct physical contact (i.e., touching) | 0 <input type="checkbox"/> | 1 <input type="checkbox"/> |

# Enrollment: Close Contacts



Attach a PID label here:

5. Did you develop any of the following symptoms within 21 days of the survivor's Ebola event?

- |                         |                               |                                |                            |                               |                                |
|-------------------------|-------------------------------|--------------------------------|----------------------------|-------------------------------|--------------------------------|
| a. Fever                | 0 <input type="checkbox"/> No | 1 <input type="checkbox"/> Yes | i. Myalgia (muscle pain)   | 0 <input type="checkbox"/> No | 1 <input type="checkbox"/> Yes |
| b. Loss of appetite     | 0 <input type="checkbox"/> No | 1 <input type="checkbox"/> Yes | j. Arthralgia (joint pain) | 0 <input type="checkbox"/> No | 1 <input type="checkbox"/> Yes |
| c. Nausea               | 0 <input type="checkbox"/> No | 1 <input type="checkbox"/> Yes | k. Breathing difficulties  | 0 <input type="checkbox"/> No | 1 <input type="checkbox"/> Yes |
| d. Vomiting             | 0 <input type="checkbox"/> No | 1 <input type="checkbox"/> Yes | l. Shortness of breath     | 0 <input type="checkbox"/> No | 1 <input type="checkbox"/> Yes |
| e. Diarrhea             | 0 <input type="checkbox"/> No | 1 <input type="checkbox"/> Yes | m. Hiccups                 | 0 <input type="checkbox"/> No | 1 <input type="checkbox"/> Yes |
| f. Headache             | 0 <input type="checkbox"/> No | 1 <input type="checkbox"/> Yes | n. Red eyes                | 0 <input type="checkbox"/> No | 1 <input type="checkbox"/> Yes |
| g. Abdominal pain       | 0 <input type="checkbox"/> No | 1 <input type="checkbox"/> Yes | o. Fatigue                 | 0 <input type="checkbox"/> No | 1 <input type="checkbox"/> Yes |
| h. Unexplained bleeding | 0 <input type="checkbox"/> No | 1 <input type="checkbox"/> Yes | p. Sore throat             | 0 <input type="checkbox"/> No | 1 <input type="checkbox"/> Yes |

6. Have you had sexual contact with the survivor since his/her Ebola event?

0  No or not applicable → **Go to Question 8.**

1  Yes →

7. Since the Ebola event, how often do you use condoms with the survivor?

0  Never 1  Sometimes 2  Always

8. Have you ever been tested for Ebola?

0  No 1  Yes

9. Have you been pregnant during or since the survivor's Ebola event?

0  No or not applicable

1  Yes →

Answer the following questions for each pregnancy since the survivor's Ebola event.

| 10. Outcome of pregnancy: | a. 1st pregnancy                                                                   | b. 2nd pregnancy                                                                   | c. 3rd pregnancy                                                                   |
|---------------------------|------------------------------------------------------------------------------------|------------------------------------------------------------------------------------|------------------------------------------------------------------------------------|
|                           | 1 <input type="checkbox"/> Still pregnant                                          | 1 <input type="checkbox"/> Still pregnant                                          | 1 <input type="checkbox"/> Still pregnant                                          |
|                           | 2 <input type="checkbox"/> Live birth                                              | 2 <input type="checkbox"/> Live birth                                              | 2 <input type="checkbox"/> Live birth                                              |
|                           | 3 <input type="checkbox"/> Live birth with subsequent infant death                 | 3 <input type="checkbox"/> Live birth with subsequent infant death                 | 3 <input type="checkbox"/> Live birth with subsequent infant death                 |
|                           | 4 <input type="checkbox"/> Still birth/intrauterine fetal demise (IUFD ≥ 20 weeks) | 4 <input type="checkbox"/> Still birth/intrauterine fetal demise (IUFD ≥ 20 weeks) | 4 <input type="checkbox"/> Still birth/intrauterine fetal demise (IUFD ≥ 20 weeks) |
|                           | 5 <input type="checkbox"/> Spontaneous abortion (IUFD < 20 weeks)                  | 5 <input type="checkbox"/> Spontaneous abortion (IUFD < 20 weeks)                  | 5 <input type="checkbox"/> Spontaneous abortion (IUFD < 20 weeks)                  |
|                           | 6 <input type="checkbox"/> Induced abortion                                        | 6 <input type="checkbox"/> Induced abortion                                        | 6 <input type="checkbox"/> Induced abortion                                        |
|                           | 7 <input type="checkbox"/> Other; specify:<br>_____                                | 7 <input type="checkbox"/> Other; specify:<br>_____                                | 7 <input type="checkbox"/> Other; specify:<br>_____                                |

|                                                    |                                                   |                                                   |                                                   |
|----------------------------------------------------|---------------------------------------------------|---------------------------------------------------|---------------------------------------------------|
| 11. Any medical problems with the fetus or infant? | 0 <input type="checkbox"/> No                     | 0 <input type="checkbox"/> No                     | 0 <input type="checkbox"/> No                     |
|                                                    | 1 <input type="checkbox"/> Yes, specify:<br>_____ | 1 <input type="checkbox"/> Yes, specify:<br>_____ | 1 <input type="checkbox"/> Yes, specify:<br>_____ |

# Enrollment: Close Contacts



Attach a PID label here:

## E. Specimen Documentation

**Note: Blood samples are optional for volunteers < 12 years of age.**

1. Were the following specimens obtained:

a. Blood      0  No    1  Yes →

b. Urine      0  No    1  Yes →

**Kit Number Label here:**

Place 2nd Kit Number label here, if a 2nd kit is used:

2. Has the volunteer had anything to eat or drink (other than water) in the past 8 hours?

0  No

1  Yes

Signature: \_\_\_\_\_ Date: \_\_\_\_\_

# Visit 1 (Baseline)

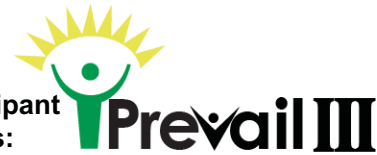

Attach a PID label here:

**Enrollment Date:**

(example: 01-AUG-2015)

|     |  |       |  |  |      |  |  |  |  |  |  |
|-----|--|-------|--|--|------|--|--|--|--|--|--|
|     |  |       |  |  |      |  |  |  |  |  |  |
| Day |  | Month |  |  | Year |  |  |  |  |  |  |

**Participant Initials:** \_\_\_\_\_

**Complete this form for survivors of Ebola, close contacts, and others chosen as controls who are enrolled in PREVAIL III.**

## A. Demographics

1. Date of birth: (example: 03-MAR-1984)

|     |  |       |  |  |      |  |  |  |  |  |  |
|-----|--|-------|--|--|------|--|--|--|--|--|--|
|     |  |       |  |  |      |  |  |  |  |  |  |
| Day |  | Month |  |  | Year |  |  |  |  |  |  |

**OR**

|      |  |  |  |
|------|--|--|--|
|      |  |  |  |
| Year |  |  |  |

 (If only year is known)

2. Gender: 1  Male 2  Female

3. Last type of school completed

|                                                          |                                        |                                              |
|----------------------------------------------------------|----------------------------------------|----------------------------------------------|
| 0 <input type="checkbox"/> No formal education completed | 2 <input type="checkbox"/> Junior high | 4 <input type="checkbox"/> Vocational school |
| 1 <input type="checkbox"/> Primary school                | 3 <input type="checkbox"/> High school | 5 <input type="checkbox"/> University        |

## B. Clinical Information

1. Weight: 

|  |  |  |  |
|--|--|--|--|
|  |  |  |  |
|--|--|--|--|

 . 

|  |
|--|
|  |
|--|

 kg

2. Height: 

|  |  |  |  |
|--|--|--|--|
|  |  |  |  |
|--|--|--|--|

 . 

|  |
|--|
|  |
|--|

 cm

3. Blood pressure: 

|  |  |  |
|--|--|--|
|  |  |  |
|--|--|--|

 / 

|  |  |  |
|--|--|--|
|  |  |  |
|--|--|--|

 mmHg (SBP/DBP)

4. Pulse: 

|  |  |  |
|--|--|--|
|  |  |  |
|--|--|--|

 beats per minute

5. Body temperature: 

|  |  |
|--|--|
|  |  |
|--|--|

 . 

|  |
|--|
|  |
|--|

 °C

6. Outcome of today's pregnancy test:

0  Negative  
 1  Positive  
 2  Not applicable (Male or female without child bearing potential)

## C. Review of Systems

For each system, indicate whether the volunteer is experiencing any of the indicated symptoms.

|                                                                                                                                                                                            |                                                                                                                                                                                                                                                                                                                                                                                                                                                                                                                 |                                                                                                                                                                                            |                                                                                                                                                  |
|--------------------------------------------------------------------------------------------------------------------------------------------------------------------------------------------|-----------------------------------------------------------------------------------------------------------------------------------------------------------------------------------------------------------------------------------------------------------------------------------------------------------------------------------------------------------------------------------------------------------------------------------------------------------------------------------------------------------------|--------------------------------------------------------------------------------------------------------------------------------------------------------------------------------------------|--------------------------------------------------------------------------------------------------------------------------------------------------|
| <p>1. Constitutional</p> <p>0 <input type="checkbox"/> No<br/>1 <input type="checkbox"/> Yes →</p>                                                                                         | <p><b>Mark all that apply</b></p> <table border="1" style="width: 100%;"> <tr> <td style="width: 50%; vertical-align: top;"> <p>1 <input type="checkbox"/> Fever</p> <p>1 <input type="checkbox"/> Chills</p> <p>1 <input type="checkbox"/> Night sweats</p> </td> <td style="width: 50%; vertical-align: top;"> <p>1 <input type="checkbox"/> Weight loss</p> <p>1 <input type="checkbox"/> Weight gain</p> <p>1 <input type="checkbox"/> Fatigue</p> </td> </tr> </table>                                     | <p>1 <input type="checkbox"/> Fever</p> <p>1 <input type="checkbox"/> Chills</p> <p>1 <input type="checkbox"/> Night sweats</p>                                                            | <p>1 <input type="checkbox"/> Weight loss</p> <p>1 <input type="checkbox"/> Weight gain</p> <p>1 <input type="checkbox"/> Fatigue</p>            |
| <p>1 <input type="checkbox"/> Fever</p> <p>1 <input type="checkbox"/> Chills</p> <p>1 <input type="checkbox"/> Night sweats</p>                                                            | <p>1 <input type="checkbox"/> Weight loss</p> <p>1 <input type="checkbox"/> Weight gain</p> <p>1 <input type="checkbox"/> Fatigue</p>                                                                                                                                                                                                                                                                                                                                                                           |                                                                                                                                                                                            |                                                                                                                                                  |
| <p>2. Ears, nose and throat</p> <p>0 <input type="checkbox"/> No<br/>1 <input type="checkbox"/> Yes →</p>                                                                                  | <table border="1" style="width: 100%;"> <tr> <td style="width: 50%; vertical-align: top;"> <p>1 <input type="checkbox"/> Decreased hearing</p> <p>1 <input type="checkbox"/> Tinnitus</p> <p>1 <input type="checkbox"/> Pain</p> <p>1 <input type="checkbox"/> Discharge from ear</p> </td> <td style="width: 50%; vertical-align: top;"> <p>1 <input type="checkbox"/> Discharge from nose</p> <p>1 <input type="checkbox"/> Hoarseness</p> <p>1 <input type="checkbox"/> Nose bleeds</p> </td> </tr> </table> | <p>1 <input type="checkbox"/> Decreased hearing</p> <p>1 <input type="checkbox"/> Tinnitus</p> <p>1 <input type="checkbox"/> Pain</p> <p>1 <input type="checkbox"/> Discharge from ear</p> | <p>1 <input type="checkbox"/> Discharge from nose</p> <p>1 <input type="checkbox"/> Hoarseness</p> <p>1 <input type="checkbox"/> Nose bleeds</p> |
| <p>1 <input type="checkbox"/> Decreased hearing</p> <p>1 <input type="checkbox"/> Tinnitus</p> <p>1 <input type="checkbox"/> Pain</p> <p>1 <input type="checkbox"/> Discharge from ear</p> | <p>1 <input type="checkbox"/> Discharge from nose</p> <p>1 <input type="checkbox"/> Hoarseness</p> <p>1 <input type="checkbox"/> Nose bleeds</p>                                                                                                                                                                                                                                                                                                                                                                |                                                                                                                                                                                            |                                                                                                                                                  |
| <p>3. Breast</p> <p>0 <input type="checkbox"/> No<br/>1 <input type="checkbox"/> Yes →</p>                                                                                                 | <table border="1" style="width: 100%;"> <tr> <td style="width: 50%; vertical-align: top;"> <p>1 <input type="checkbox"/> Lumps</p> <p>1 <input type="checkbox"/> Nipple discharge</p> </td> <td style="width: 50%; vertical-align: top;"> <p>1 <input type="checkbox"/> Pain</p> </td> </tr> </table>                                                                                                                                                                                                           | <p>1 <input type="checkbox"/> Lumps</p> <p>1 <input type="checkbox"/> Nipple discharge</p>                                                                                                 | <p>1 <input type="checkbox"/> Pain</p>                                                                                                           |
| <p>1 <input type="checkbox"/> Lumps</p> <p>1 <input type="checkbox"/> Nipple discharge</p>                                                                                                 | <p>1 <input type="checkbox"/> Pain</p>                                                                                                                                                                                                                                                                                                                                                                                                                                                                          |                                                                                                                                                                                            |                                                                                                                                                  |

# Visit 1 (Baseline)

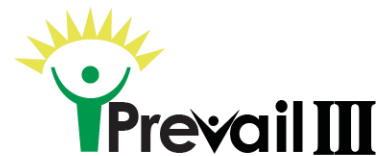

Attach a PID label here:

## Mark all that apply

### 4. Cardiovascular

0  No

1  Yes →

1  Palpitations

1  Chest pain

1  Shortness of breath

1  Paroxysmal nocturnal dyspnea

1  Orthopnea

1  Claudication (leg pain with walking)

1  Edema

### 5. Respiratory

0  No

1  Yes →

1  Wheezing

1  Dyspnea

1  Cough/sputum

1  Hemoptysis

1  Positive TB skin test

1  Congestion

### 6. Gastrointestinal

0  No

1  Yes →

1  Dysphagia

1  Anorexia

1  Nausea

1  Vomiting

1  Hematemesis

1  Diarrhea

1  Melena

1  Rectal bleeding

1  Change in bowel habits

1  Jaundice

1  Abdominal pain

### 7. Genito-urinary

0  No

1  Yes →

1  Dysuria

1  Hematuria

1  Frequency

1  Polyuria

1  Urgency

1  Hesitancy

1  Incontinence

1  Nocturia

### 8. Male reproductive

0  No

1  Yes →

2  N/A

1  Penile discharge

1  Testicular pain or mass

1  Infertility

1  Impotence/decreased libido

1  Orchitis (pain in groin)

### 9. Female reproductive

0  No

1  Yes →

2  N/A

1  Menarche

1  Menopause

1  Postmenopausal symptoms

1  Painful periods

1  Odor

1  Decreased libido

1  Amenorrhea

1  Abnormal vaginal bleeding

### 10. Musculoskeletal

0  No

1  Yes →

1  Joint pain (mono or polyarticular)

1  Edema

1  Heat

1  Redness

1  Stiffness

1  Deformity

1  Muscle pain or tenderness

# Visit 1 (Baseline)

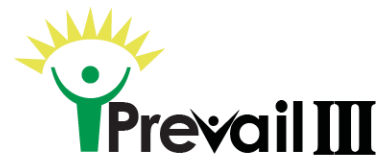

Attach a PID label here:

### Mark all that apply

|                                                                                                      |                                                                                                                                                                                                                                                                                                                                                                                                                                                                                                                                                                                                                       |
|------------------------------------------------------------------------------------------------------|-----------------------------------------------------------------------------------------------------------------------------------------------------------------------------------------------------------------------------------------------------------------------------------------------------------------------------------------------------------------------------------------------------------------------------------------------------------------------------------------------------------------------------------------------------------------------------------------------------------------------|
| <p>11. Neurological</p> <p>0 <input type="checkbox"/> No</p> <p>1 <input type="checkbox"/> Yes →</p> | <p>1 <input type="checkbox"/> Headache</p> <p>1 <input type="checkbox"/> Syncope</p> <p>1 <input type="checkbox"/> Dizziness</p> <p>1 <input type="checkbox"/> Vertigo</p> <p>1 <input type="checkbox"/> Seizures</p> <p>1 <input type="checkbox"/> Loss of vision</p> <p>1 <input type="checkbox"/> Diplopia</p> <p>1 <input type="checkbox"/> Paresthesia</p> <p>1 <input type="checkbox"/> Paralysis</p> <p>1 <input type="checkbox"/> Weakness in any limbs</p> <p>1 <input type="checkbox"/> Tremor</p> <p>1 <input type="checkbox"/> Ataxia (balance problem)</p> <p>1 <input type="checkbox"/> Memory loss</p> |
| <p>12. Skin</p> <p>0 <input type="checkbox"/> No</p> <p>1 <input type="checkbox"/> Yes →</p>         | <p>1 <input type="checkbox"/> Itching</p> <p>1 <input type="checkbox"/> Rash</p> <p>1 <input type="checkbox"/> Lumps and/or bumps</p> <p>1 <input type="checkbox"/> Hair and/or nail change</p> <p>1 <input type="checkbox"/> Depigmentation</p> <p>1 <input type="checkbox"/> Bruising</p>                                                                                                                                                                                                                                                                                                                           |
| <p>13. Lymphatic</p> <p>0 <input type="checkbox"/> No</p> <p>1 <input type="checkbox"/> Yes →</p>    | <p>1 <input type="checkbox"/> Enlargement of lymph nodes</p>                                                                                                                                                                                                                                                                                                                                                                                                                                                                                                                                                          |

### D. Medical History

1. Based on the medical history available and the physical examination, record whether the volunteer has **EVER** experienced any of the following:

0  None of the following

**OR**

- |                                                      |                                                     |
|------------------------------------------------------|-----------------------------------------------------|
| 1 <input type="checkbox"/> a. Hypertension           | 1 <input type="checkbox"/> g. Malaria               |
| 1 <input type="checkbox"/> b. Stroke                 | 1 <input type="checkbox"/> h. Syphilis or other STD |
| 1 <input type="checkbox"/> c. Ischemic heart disease | 1 <input type="checkbox"/> i. HIV/AIDS              |
| 1 <input type="checkbox"/> d. Diabetes mellitus      | 1 <input type="checkbox"/> j. Hepatitis B           |
| 1 <input type="checkbox"/> e. Cancer; specify: _____ | 1 <input type="checkbox"/> k. Hepatitis C           |
| 1 <input type="checkbox"/> f. Tuberculosis           | 1 <input type="checkbox"/> l. Typhoid fever         |

### E. Pregnancy History - complete for girls and women ≥12 years of age

1. Excluding the current pregnancy (if applicable) how many times does the volunteer report:

|                                                                                                                                                                                                                                                                                                |                                                                                                                                                                                                                                                                                |                                                                                                                                                                                                 |
|------------------------------------------------------------------------------------------------------------------------------------------------------------------------------------------------------------------------------------------------------------------------------------------------|--------------------------------------------------------------------------------------------------------------------------------------------------------------------------------------------------------------------------------------------------------------------------------|-------------------------------------------------------------------------------------------------------------------------------------------------------------------------------------------------|
| <p>a. Being pregnant?</p> <p>b. Pregnancies resulting in live births?</p> <p>c. Pregnancies resulting in still birth or fetal demise (IUFD ≥ 20 weeks)?</p> <p>d. Pregnancies resulting in spontaneous abortion (IUFD &lt; 20 weeks)?</p> <p>e. Pregnancies resulting in induced abortion?</p> | <p><u>Pregnancies</u></p> <p><input type="text"/> <input type="text"/></p> | <p><b>If 0, go to Section F.</b></p> <div style="border: 1px solid black; padding: 5px; width: fit-content;"> <p><b>Note: include pregnancy before and after EVD, if applicable.</b></p> </div> |
|------------------------------------------------------------------------------------------------------------------------------------------------------------------------------------------------------------------------------------------------------------------------------------------------|--------------------------------------------------------------------------------------------------------------------------------------------------------------------------------------------------------------------------------------------------------------------------------|-------------------------------------------------------------------------------------------------------------------------------------------------------------------------------------------------|

# Visit 1 (Baseline)

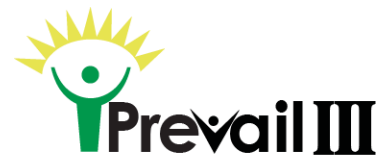

Attach a PID label here:

## F. Post Traumatic Stress - complete for volunteers ≥ 12 years of age.

Ask the volunteer to consider the following reactions which sometimes occur after a traumatic event. Read each response and ask whether the volunteer experienced it **AT LEAST TWICE IN THE PAST WEEK.**

|                                                                                                                                                                 | No                         | Yes , at least twice<br>in the past week |
|-----------------------------------------------------------------------------------------------------------------------------------------------------------------|----------------------------|------------------------------------------|
| 1. Upsetting thoughts or memories about the event that have come into your mind against your will.                                                              | 0 <input type="checkbox"/> | 1 <input type="checkbox"/>               |
| 2. Upsetting dreams about the event.                                                                                                                            | 0 <input type="checkbox"/> | 1 <input type="checkbox"/>               |
| 3. Acting or feeling as though the event were happening again.                                                                                                  | 0 <input type="checkbox"/> | 1 <input type="checkbox"/>               |
| 4. Feeling upset by reminders of the event.                                                                                                                     | 0 <input type="checkbox"/> | 1 <input type="checkbox"/>               |
| 5. Bodily reactions (such as fast heartbeat, stomach churning, sweatiness, dizziness) when reminded of the event.                                               | 0 <input type="checkbox"/> | 1 <input type="checkbox"/>               |
| 6. Difficulty falling or staying asleep.                                                                                                                        | 0 <input type="checkbox"/> | 1 <input type="checkbox"/>               |
| 7. Irritability or outbursts of anger.                                                                                                                          | 0 <input type="checkbox"/> | 1 <input type="checkbox"/>               |
| 8. Difficulty concentrating.                                                                                                                                    | 0 <input type="checkbox"/> | 1 <input type="checkbox"/>               |
| 9. Heightened awareness of potential dangers to yourself and others. (Have you been more concerned or worried about bad things happening to you or you family?) | 0 <input type="checkbox"/> | 1 <input type="checkbox"/>               |
| 10. Being jumpy or being startled at something unexpected. (Have you been scared or frightened by something unusual?)                                           | 0 <input type="checkbox"/> | 1 <input type="checkbox"/>               |

## G. Depression - complete for volunteers ≥ 12 years of age.

Read the following questions to the volunteer. "During the **PAST TWO WEEKS**, how often have you been bothered by any of the following?"

|                                                                                                                                                                             | Not at all                                     | Several<br>days<br>(≤ 7 days) | More than half<br>the days<br>(8-11 days) | Nearly<br>every day<br>(≥ 12 days) |
|-----------------------------------------------------------------------------------------------------------------------------------------------------------------------------|------------------------------------------------|-------------------------------|-------------------------------------------|------------------------------------|
| 1. Little interest or pleasure in doing things.                                                                                                                             | 0 <input type="checkbox"/>                     | 1 <input type="checkbox"/>    | 2 <input type="checkbox"/>                | 3 <input type="checkbox"/>         |
| 2. Feeling down, depressed, or hopeless.                                                                                                                                    | 0 <input type="checkbox"/>                     | 1 <input type="checkbox"/>    | 2 <input type="checkbox"/>                | 3 <input type="checkbox"/>         |
| 3. Trouble falling or staying asleep, or sleeping too much.                                                                                                                 | 0 <input type="checkbox"/>                     | 1 <input type="checkbox"/>    | 2 <input type="checkbox"/>                | 3 <input type="checkbox"/>         |
| 4. Feeling tired or having little energy.                                                                                                                                   | 0 <input type="checkbox"/>                     | 1 <input type="checkbox"/>    | 2 <input type="checkbox"/>                | 3 <input type="checkbox"/>         |
| 5. Poor appetite or overeating.                                                                                                                                             | 0 <input type="checkbox"/>                     | 1 <input type="checkbox"/>    | 2 <input type="checkbox"/>                | 3 <input type="checkbox"/>         |
| 6. Feeling bad about yourself or that you are a failure or have let yourself or your family down.                                                                           | 0 <input type="checkbox"/>                     | 1 <input type="checkbox"/>    | 2 <input type="checkbox"/>                | 3 <input type="checkbox"/>         |
| 7. Trouble concentrating on things, such as reading the newspaper or watching television.                                                                                   | 0 <input type="checkbox"/>                     | 1 <input type="checkbox"/>    | 2 <input type="checkbox"/>                | 3 <input type="checkbox"/>         |
| 8. Moving or speaking so slowly that other people could have noticed. Or the opposite, being so fidgety or restless that you have been moving around a lot more than usual. | 0 <input type="checkbox"/>                     | 1 <input type="checkbox"/>    | 2 <input type="checkbox"/>                | 3 <input type="checkbox"/>         |
| 9. Thoughts that you would be better off dead, or of hurting yourself.                                                                                                      | 0 <input type="checkbox"/>                     | 1 <input type="checkbox"/>    | 2 <input type="checkbox"/>                | 3 <input type="checkbox"/>         |
| 10. If you had any of these problems, how difficult have these problems made it for you to do your work, take care of things at home, or get along with other people?       |                                                |                               |                                           |                                    |
| 0 <input type="checkbox"/> Not difficult at all                                                                                                                             | 2 <input type="checkbox"/> Very difficult      |                               |                                           |                                    |
| 1 <input type="checkbox"/> Somewhat difficult                                                                                                                               | 3 <input type="checkbox"/> Extremely difficult |                               |                                           |                                    |

**Complete only if any problems are indicated above.**



# Visit 1 (Baseline)



Attach a PID label here:

## H. Medications

Ask whether the volunteer takes any of the following types of drugs daily:

|                                                              | No                         | Yes                        |
|--------------------------------------------------------------|----------------------------|----------------------------|
| 1. Insulin                                                   | 0 <input type="checkbox"/> | 1 <input type="checkbox"/> |
| 2. Oral hypoglycemic agents for diabetes                     | 0 <input type="checkbox"/> | 1 <input type="checkbox"/> |
| 3. Blood pressure lowering drugs                             | 0 <input type="checkbox"/> | 1 <input type="checkbox"/> |
| 4. Drugs for HIV                                             | 0 <input type="checkbox"/> | 1 <input type="checkbox"/> |
| 5. Amphetamines or other stimulants                          | 0 <input type="checkbox"/> | 1 <input type="checkbox"/> |
| 6. Librium, Valium or other anti-anxiety agents              | 0 <input type="checkbox"/> | 1 <input type="checkbox"/> |
| 7. Acetaminophen                                             | 0 <input type="checkbox"/> | 1 <input type="checkbox"/> |
| 8. Non-steroidal anti-inflammatory agents (excludes aspirin) | 0 <input type="checkbox"/> | 1 <input type="checkbox"/> |
| 9. Aspirin                                                   | 0 <input type="checkbox"/> | 1 <input type="checkbox"/> |

## I. Vision Screening

1. Was vision screening performed?

- 1  No  
2  Yes

2. Reason: \_\_\_\_\_

**Go to Question 5.**

3. Method of acuity testing

- 1  10 foot lane  
2  Smart phone  
3  Other; specify: \_\_\_\_\_

4. Presenting vision

a. Right eye: 20/

b. Left eye: 20/

c. Was this vision measured wearing spectacles?

- 0  No      1  Yes

Note: Have the volunteer wear their distance glasses, if applicable. Record 999 if the volunteer cannot read the largest character.

# Visit 1 (Baseline)



Attach a PID label here:

5. Ask the volunteer, "Do you currently have any of the following eye problems?"

a. Blurry vision

0  No

1  Yes

d. Eye redness

0  No

1  Yes

g. Other; specify: \_\_\_\_\_

0  No

1  Yes

b. Pain in eye

0  No

1  Yes

e. Discharge from eye

0  No

1  Yes

c. Sensitivity to light

0  No

1  Yes

f. Itchy eyes

0  No

1  Yes

6. Will the volunteer be referred to the eye clinic at JFK?

0  No

1  Yes →

7. Reason (mark all that apply):

1  a. Vision (presenting vision worse than 20/25, e.g., 20/32)

1  b. Self-reported current eye problem

1  c. Self-reported eye problem that developed during or after EVD event (even if currently resolved)

1  d. Eye abnormality detected upon physical exam

1  e. No eye problem but referred by staff

2  Volunteer unwilling or unable to attend eye clinic

8. Pinhole test Perform for each eye with vision testing (see question I.4) worse than 20/25 (e.g., 20/32).

a. Right eye: 20/

b. Left eye: 20/

Note: Have the volunteer wear their distance glasses, if applicable. Record 999 if the volunteer cannot read the largest character.

## J. Physical Exam

1. Head/face

1  Normal

2  Abnormal →

3  Not done

2. Mark all that apply.

1  Deformity

1  Asymmetry

1  Swelling

1  Other; specify: \_\_\_\_\_

3. Eyes

1  Normal

2  Abnormal →

3  Not done

4. Refer to eye clinic;

reason: \_\_\_\_\_

# Visit 1 (Baseline)

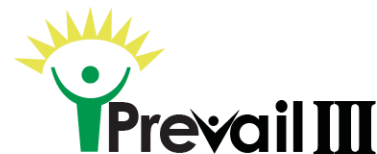

Attach a PID label here:

## 5. Ears, nose and throat

- 1  Normal
- 2  Abnormal →
- 3  Not done

|                                                     |                                                     |                                                     |
|-----------------------------------------------------|-----------------------------------------------------|-----------------------------------------------------|
| <b>6a. Nose</b><br>(Mark all that apply)            | <b>6b. Ear</b><br>(Mark all that apply)             | <b>6c. Mouth/throat</b><br>(Mark all that apply)    |
| 1 <input type="checkbox"/> Deformity/mass           | 1 <input type="checkbox"/> TM                       | 1 <input type="checkbox"/> Mucosa                   |
| 1 <input type="checkbox"/> Mucosa                   | 1 <input type="checkbox"/> Ext. canal               | 1 <input type="checkbox"/> Mass                     |
| 1 <input type="checkbox"/> Ulcer                    | 1 <input type="checkbox"/> Hearing                  | 1 <input type="checkbox"/> Ulcer                    |
| 1 <input type="checkbox"/> Other; specify:<br>_____ | 1 <input type="checkbox"/> Other; specify:<br>_____ | 1 <input type="checkbox"/> Missing teeth            |
|                                                     |                                                     | 1 <input type="checkbox"/> Dental caries            |
|                                                     |                                                     | 1 <input type="checkbox"/> Other; specify:<br>_____ |

## 7. Chest

- 1  Normal
- 2  Abnormal →
- 3  Not done

|                                                    |                                                  |
|----------------------------------------------------|--------------------------------------------------|
| <b>8. Mark all that apply.</b>                     |                                                  |
| 1 <input type="checkbox"/> Wheezes                 | 1 <input type="checkbox"/> Pericardial rub       |
| 1 <input type="checkbox"/> Decreased breath sounds | 1 <input type="checkbox"/> Rales/crackles        |
| 1 <input type="checkbox"/> Heart murmur            | 1 <input type="checkbox"/> Other; specify: _____ |

## 9. Abdomen

- 1  Normal
- 2  Abnormal →
- 3  Not done

|                                         |                                                  |
|-----------------------------------------|--------------------------------------------------|
| <b>10. Mark all that apply.</b>         |                                                  |
| 1 <input type="checkbox"/> Splenomegaly | 1 <input type="checkbox"/> Tenderness            |
| 1 <input type="checkbox"/> Hepatomegaly | 1 <input type="checkbox"/> Distension            |
| 1 <input type="checkbox"/> Mass         | 1 <input type="checkbox"/> Other; specify: _____ |

## 11. Extremities

- 1  Normal
- 2  Abnormal →
- 3  Not done

|                                      |                                                  |
|--------------------------------------|--------------------------------------------------|
| <b>12. Mark all that apply.</b>      |                                                  |
| 1 <input type="checkbox"/> Deformity | 1 <input type="checkbox"/> Decreased pulse       |
| 1 <input type="checkbox"/> Edema     | 1 <input type="checkbox"/> Bruit                 |
| 1 <input type="checkbox"/> Cyanosis  | 1 <input type="checkbox"/> Other; specify: _____ |

## 13. Musculoskeletal

- 1  Normal
- 2  Abnormal →
- 3  Not done

|                                                     |                                                |                                                     |
|-----------------------------------------------------|------------------------------------------------|-----------------------------------------------------|
| <b>14a. Muscles</b><br>(Mark all that apply)        | <b>14b. Joints</b><br>(Mark all that apply)    |                                                     |
| 1 <input type="checkbox"/> Atrophy                  | 1 <input type="checkbox"/> Swelling/effusion   | 1 <input type="checkbox"/> Decreased ROM            |
| 1 <input type="checkbox"/> Weakness                 | 1 <input type="checkbox"/> Synovial tenderness | 1 <input type="checkbox"/> Other; specify:<br>_____ |
| 1 <input type="checkbox"/> Tenderness               | 1 <input type="checkbox"/> Deformity           |                                                     |
| 1 <input type="checkbox"/> Other; specify:<br>_____ |                                                |                                                     |

# Visit 1 (Baseline)



Attach a PID label here:

## 15. Neurologic

- 1  Normal
- 2  Abnormal →
- 3  Not done

### 16. Mark all that apply

- |                                             |                                                  |
|---------------------------------------------|--------------------------------------------------|
| 1 <input type="checkbox"/> Cognition        | 1 <input type="checkbox"/> Focal weakness        |
| 1 <input type="checkbox"/> Speech           | 1 <input type="checkbox"/> Gait/balance          |
| 1 <input type="checkbox"/> Tremor           | 1 <input type="checkbox"/> Sensory               |
| 1 <input type="checkbox"/> Reflexes         | 1 <input type="checkbox"/> Other; specify: _____ |
| 1 <input type="checkbox"/> Cranial nerve(s) |                                                  |

## 17. Skin

- 1  Normal
- 2  Abnormal →
- 3  Not done

### 18. Mark all that apply.

- |                                   |                                                  |
|-----------------------------------|--------------------------------------------------|
| 1 <input type="checkbox"/> Rash   | 1 <input type="checkbox"/> Jaundice              |
| 1 <input type="checkbox"/> Mass   | 1 <input type="checkbox"/> Pigmentation          |
| 1 <input type="checkbox"/> Lesion | 1 <input type="checkbox"/> Other; specify: _____ |

## 19. Breast

- 1  Normal
- 2  Abnormal →
- 3  Not done

### 20. Mark all that apply.

- |                                            |                                                  |
|--------------------------------------------|--------------------------------------------------|
| 1 <input type="checkbox"/> Mass            | 1 <input type="checkbox"/> Nipple discharge      |
| 1 <input type="checkbox"/> Skin retraction | 1 <input type="checkbox"/> Other; specify: _____ |

Record any additional notes on the Clinical Notes Worksheet.

## K. Outcome

1. Will the volunteer be referred to medical care?

- 0  No
- 1  Yes →

2. Referral to: \_\_\_\_\_

3. Reason: \_\_\_\_\_

Signature: \_\_\_\_\_ Date: \_\_\_\_\_

# Visit 2 (6 Months)

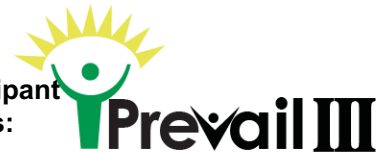

Attach a PID label here:

**Date of Visit:**

(example: 01-SEP-2016)

|     |  |       |  |      |   |   |
|-----|--|-------|--|------|---|---|
|     |  |       |  | 2    | 0 | 1 |
| Day |  | Month |  | Year |   |   |

Participant Initials: \_\_\_\_\_

Site: 

|  |  |
|--|--|
|  |  |
|--|--|

**Complete this form for volunteers enrolled in the Ebola Natural History Study. If the volunteer is < 12 years old, also complete the Pediatric Supplement form.**

**A. Clinical Information**

1. Weight: 

|  |  |  |
|--|--|--|
|  |  |  |
|--|--|--|

 kg

2. Height: 

|  |  |  |
|--|--|--|
|  |  |  |
|--|--|--|

 cm  
Complete for volunteers <18 years

3. Blood pressure: 

|  |  |
|--|--|
|  |  |
|--|--|

 / 

|  |  |
|--|--|
|  |  |
|--|--|

 mmHg (SBP/DBP)

4. Pulse: 

|  |  |
|--|--|
|  |  |
|--|--|

 beats per minute

5. Body temperature: 

|  |  |
|--|--|
|  |  |
|--|--|

 °C

6. Outcome of today's pregnancy test:  
 0  Negative  
 1  Positive  
 2  Not applicable (Male or female without child bearing potential)

**B. Review of Systems**

For each system, indicate whether the volunteer is experiencing any of the indicated symptoms.

**Mark all that apply**

|                   |                                                                   |                                                                                                                                                                |
|-------------------|-------------------------------------------------------------------|----------------------------------------------------------------------------------------------------------------------------------------------------------------|
| 1. Constitutional | 0 <input type="checkbox"/> No<br>1 <input type="checkbox"/> Yes → | 1 <input type="checkbox"/> Fever<br>1 <input type="checkbox"/> Chills<br>1 <input type="checkbox"/> Unusual night sweats<br>1 <input type="checkbox"/> Fatigue |
|-------------------|-------------------------------------------------------------------|----------------------------------------------------------------------------------------------------------------------------------------------------------------|

|                          |                                                                   |                                                                                                                                                                                                                                                                                                              |
|--------------------------|-------------------------------------------------------------------|--------------------------------------------------------------------------------------------------------------------------------------------------------------------------------------------------------------------------------------------------------------------------------------------------------------|
| 2. Ears, nose and throat | 0 <input type="checkbox"/> No<br>1 <input type="checkbox"/> Yes → | 1 <input type="checkbox"/> Decreased hearing<br>1 <input type="checkbox"/> Tinnitus<br>1 <input type="checkbox"/> Pain<br>1 <input type="checkbox"/> Discharge from ear<br>1 <input type="checkbox"/> Discharge from nose<br>1 <input type="checkbox"/> Hoarseness<br>1 <input type="checkbox"/> Nose bleeds |
|--------------------------|-------------------------------------------------------------------|--------------------------------------------------------------------------------------------------------------------------------------------------------------------------------------------------------------------------------------------------------------------------------------------------------------|

|           |                                                                   |                                                                                                                    |
|-----------|-------------------------------------------------------------------|--------------------------------------------------------------------------------------------------------------------|
| 3. Breast | 0 <input type="checkbox"/> No<br>1 <input type="checkbox"/> Yes → | 1 <input type="checkbox"/> Lumps<br>1 <input type="checkbox"/> Nipple discharge<br>1 <input type="checkbox"/> Pain |
|-----------|-------------------------------------------------------------------|--------------------------------------------------------------------------------------------------------------------|

|                   |                                                                   |                                                                                                                                                                                                                                                                                                                                              |
|-------------------|-------------------------------------------------------------------|----------------------------------------------------------------------------------------------------------------------------------------------------------------------------------------------------------------------------------------------------------------------------------------------------------------------------------------------|
| 4. Cardiovascular | 0 <input type="checkbox"/> No<br>1 <input type="checkbox"/> Yes → | 1 <input type="checkbox"/> Palpitations<br>1 <input type="checkbox"/> Chest pain<br>1 <input type="checkbox"/> Shortness of breath<br>1 <input type="checkbox"/> Paroxysmal nocturnal dyspnea<br>1 <input type="checkbox"/> Orthopnea<br>1 <input type="checkbox"/> Claudication (leg pain with walking)<br>1 <input type="checkbox"/> Edema |
|-------------------|-------------------------------------------------------------------|----------------------------------------------------------------------------------------------------------------------------------------------------------------------------------------------------------------------------------------------------------------------------------------------------------------------------------------------|

|                |                                                                   |                                                                                                                                                                                                                                                                  |
|----------------|-------------------------------------------------------------------|------------------------------------------------------------------------------------------------------------------------------------------------------------------------------------------------------------------------------------------------------------------|
| 5. Respiratory | 0 <input type="checkbox"/> No<br>1 <input type="checkbox"/> Yes → | 1 <input type="checkbox"/> Wheezing<br>1 <input type="checkbox"/> Dyspnea<br>1 <input type="checkbox"/> Cough/sputum<br>1 <input type="checkbox"/> Hemoptysis<br>1 <input type="checkbox"/> Positive TB skin test<br>1 <input type="checkbox"/> Nasal congestion |
|----------------|-------------------------------------------------------------------|------------------------------------------------------------------------------------------------------------------------------------------------------------------------------------------------------------------------------------------------------------------|

|                     |                                                                   |                                                                                                                                                                                                                                                                                                                                                                                                                                                                      |
|---------------------|-------------------------------------------------------------------|----------------------------------------------------------------------------------------------------------------------------------------------------------------------------------------------------------------------------------------------------------------------------------------------------------------------------------------------------------------------------------------------------------------------------------------------------------------------|
| 6. Gastrointestinal | 0 <input type="checkbox"/> No<br>1 <input type="checkbox"/> Yes → | 1 <input type="checkbox"/> Dysphagia<br>1 <input type="checkbox"/> Anorexia<br>1 <input type="checkbox"/> Nausea<br>1 <input type="checkbox"/> Vomiting<br>1 <input type="checkbox"/> Hematemesis<br>1 <input type="checkbox"/> Diarrhea<br>1 <input type="checkbox"/> Melena<br>1 <input type="checkbox"/> Rectal bleeding<br>1 <input type="checkbox"/> Change in bowel habits<br>1 <input type="checkbox"/> Jaundice<br>1 <input type="checkbox"/> Abdominal pain |
|---------------------|-------------------------------------------------------------------|----------------------------------------------------------------------------------------------------------------------------------------------------------------------------------------------------------------------------------------------------------------------------------------------------------------------------------------------------------------------------------------------------------------------------------------------------------------------|

## Visit 2 (6 Months)



Attach a PID label here:

### Mark all that apply

|                        |                                                                                                     |                                                                                                                                                                                                                                                                                    |                                                                                                                                                                                                                                                                          |
|------------------------|-----------------------------------------------------------------------------------------------------|------------------------------------------------------------------------------------------------------------------------------------------------------------------------------------------------------------------------------------------------------------------------------------|--------------------------------------------------------------------------------------------------------------------------------------------------------------------------------------------------------------------------------------------------------------------------|
| 7. Genito-urinary      | 0 <input type="checkbox"/> No<br>1 <input type="checkbox"/> Yes →                                   | 1 <input type="checkbox"/> Dysuria<br>1 <input type="checkbox"/> Hematuria<br>1 <input type="checkbox"/> Frequency<br>1 <input type="checkbox"/> Polyuria                                                                                                                          | 1 <input type="checkbox"/> Urgency<br>1 <input type="checkbox"/> Hesitancy<br>1 <input type="checkbox"/> Incontinence<br>1 <input type="checkbox"/> Nocturia                                                                                                             |
| 8. Male reproductive   | 0 <input type="checkbox"/> No<br>1 <input type="checkbox"/> Yes →<br>2 <input type="checkbox"/> N/A | 1 <input type="checkbox"/> Penile discharge<br>1 <input type="checkbox"/> Testicular pain or mass<br>1 <input type="checkbox"/> Infertility                                                                                                                                        | 1 <input type="checkbox"/> Impotence/decreased libido<br>1 <input type="checkbox"/> Orchitis (pain in groin)                                                                                                                                                             |
| 9. Female reproductive | 0 <input type="checkbox"/> No<br>1 <input type="checkbox"/> Yes →<br>2 <input type="checkbox"/> N/A | 1 <input type="checkbox"/> Menarche<br>1 <input type="checkbox"/> Menopause<br>1 <input type="checkbox"/> Postmenopausal symptoms<br>1 <input type="checkbox"/> Painful periods                                                                                                    | 1 <input type="checkbox"/> Odor<br>1 <input type="checkbox"/> Decreased libido<br>1 <input type="checkbox"/> Amenorrhea<br>1 <input type="checkbox"/> Abnormal vaginal bleeding                                                                                          |
| 10. Musculoskeletal    | 0 <input type="checkbox"/> No<br>1 <input type="checkbox"/> Yes →                                   | 1 <input type="checkbox"/> Joint pain (mono or polyarticular)<br>1 <input type="checkbox"/> Edema<br>1 <input type="checkbox"/> Heat<br>1 <input type="checkbox"/> Redness                                                                                                         | 1 <input type="checkbox"/> Stiffness<br>1 <input type="checkbox"/> Deformity<br>1 <input type="checkbox"/> Muscle pain or tenderness                                                                                                                                     |
| 11. Neurological       | 0 <input type="checkbox"/> No<br>1 <input type="checkbox"/> Yes →                                   | 1 <input type="checkbox"/> Headache<br>1 <input type="checkbox"/> Syncope<br>1 <input type="checkbox"/> Dizziness<br>1 <input type="checkbox"/> Vertigo<br>1 <input type="checkbox"/> Seizures<br>1 <input type="checkbox"/> Loss of vision<br>1 <input type="checkbox"/> Diplopia | 1 <input type="checkbox"/> Paresthesia<br>1 <input type="checkbox"/> Paralysis<br>1 <input type="checkbox"/> Weakness in any limbs<br>1 <input type="checkbox"/> Tremor<br>1 <input type="checkbox"/> Ataxia (balance problem)<br>1 <input type="checkbox"/> Memory loss |
| 12. Skin               | 0 <input type="checkbox"/> No<br>1 <input type="checkbox"/> Yes →                                   | 1 <input type="checkbox"/> Itching<br>1 <input type="checkbox"/> Rash<br>1 <input type="checkbox"/> Lumps and/or bumps                                                                                                                                                             | 1 <input type="checkbox"/> Hair and/or nail change<br>1 <input type="checkbox"/> Depigmentation<br>1 <input type="checkbox"/> Bruising                                                                                                                                   |
| 13. Lymphatic          | 0 <input type="checkbox"/> No<br>1 <input type="checkbox"/> Yes →                                   | 1 <input type="checkbox"/> Enlargement of lymph nodes                                                                                                                                                                                                                              |                                                                                                                                                                                                                                                                          |

# Visit 2 (6 Months)



Attach a PID label here:

## C. Diagnoses Since Baseline

1. Were any of the following conditions diagnosed by a physician or health care worker since the volunteer enrolled in PREVAIL III?

|                                                            | No                         | Yes                        | Date of Diagnosis<br>(e.g., MAY 2016) |                      |
|------------------------------------------------------------|----------------------------|----------------------------|---------------------------------------|----------------------|
|                                                            |                            |                            | Month                                 | Year                 |
| a. Diabetes (requiring insulin or oral hypoglycemic drugs) | 0 <input type="checkbox"/> | 1 <input type="checkbox"/> | <input type="text"/>                  | <input type="text"/> |
| b. Malaria                                                 | 0 <input type="checkbox"/> | 1 <input type="checkbox"/> | <input type="text"/>                  | <input type="text"/> |
| c. Tuberculosis                                            | 0 <input type="checkbox"/> | 1 <input type="checkbox"/> | <input type="text"/>                  | <input type="text"/> |
| d. Typhoid fever                                           | 0 <input type="checkbox"/> | 1 <input type="checkbox"/> | <input type="text"/>                  | <input type="text"/> |
| e. Pneumonia                                               | 0 <input type="checkbox"/> | 1 <input type="checkbox"/> | <input type="text"/>                  | <input type="text"/> |
| f. Urinary tract infection                                 | 0 <input type="checkbox"/> | 1 <input type="checkbox"/> | <input type="text"/>                  | <input type="text"/> |
| g. Hypertension                                            | 0 <input type="checkbox"/> | 1 <input type="checkbox"/> | <input type="text"/>                  | <input type="text"/> |
| h. Renal failure                                           | 0 <input type="checkbox"/> | 1 <input type="checkbox"/> | <input type="text"/>                  | <input type="text"/> |
| i. Stroke                                                  | 0 <input type="checkbox"/> | 1 <input type="checkbox"/> | <input type="text"/>                  | <input type="text"/> |

2. Has the volunteer been hospitalized since the baseline visit?

0  No

1  Yes

3. Reason: \_\_\_\_\_

## D. Sexual Activity - Complete this section for volunteers aged 12 and older.

1. Has the volunteer been sexually active since the last visit?

0  No

1  Yes

2. Since the last visit, how often was a condom used during intercourse?

0  Never

1  Sometimes

2  Always

## E. Reproductive History - Females

1. Has the volunteer had a pregnancy outcome since the baseline visit? (ask volunteers of child-bearing potential)

0  No

1  Yes

Complete a Pregnancy Outcome form to document the outcome of this pregnancy.

2. Is the volunteer currently using any hormonal contraceptive method other than condoms?

0  No

1  Yes

2  Not applicable

3. Mark all that apply:

1  Injectable

1  Oral medication

1  Implant

1  Other; specify: \_\_\_\_\_

4. Was the volunteer asked if she would be willing to provide a vaginal specimen?

0  No

1  Yes

5. Is the volunteer willing to provide this specimen?

0  No

1  Yes

Perform or schedule a vaginal secretion collection visit.

# Visit 2 (6 Months)

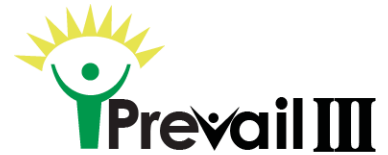

Attach a PID label here:

## F. Reproductive History - Males

Complete this section for every male volunteer aged 18 years and older.

1. Did your wife or partner experience a pregnancy since enrollment?

- 0  No
- 1  Yes
- 2  Not applicable

2. Was the volunteer asked if he would be willing to provide a semen sample?

- 0  No
- 1  Yes →

|                                                                                                                                                                                 |
|---------------------------------------------------------------------------------------------------------------------------------------------------------------------------------|
| 3. Is the volunteer willing to provide this specimen?<br>0 <input type="checkbox"/> No<br>1 <input type="checkbox"/> Yes → <b>Perform or schedule a semen collection visit.</b> |
|---------------------------------------------------------------------------------------------------------------------------------------------------------------------------------|

## G. Vision Screening

1. Was vision screening performed?

- 1  No →
- 2  Yes

|                                             |
|---------------------------------------------|
| 2. Reason: _____<br><b>Go to Section H.</b> |
|---------------------------------------------|

3. Method of acuity testing

- 1  10 foot lane
- 2  Smart phone
- 3  Other; specify: \_\_\_\_\_

4. Presenting vision

a. Right eye: 20/

b. Left eye: 20/

c. Was this vision measured wearing spectacles?

- 0  No
- 1  Yes

|                                                                                                                                     |
|-------------------------------------------------------------------------------------------------------------------------------------|
| Note: Have the volunteer wear their distance glasses, if applicable. Record 999 if the volunteer cannot read the largest character. |
|-------------------------------------------------------------------------------------------------------------------------------------|

5. Pinhole test 

|                                                                               |
|-------------------------------------------------------------------------------|
| Perform for each eye with vision testing (see question G.4) worse than 20/40. |
|-------------------------------------------------------------------------------|

a. Right eye: 20/

b. Left eye: 20/

|                                                                                                                                     |
|-------------------------------------------------------------------------------------------------------------------------------------|
| Note: Have the volunteer wear their distance glasses, if applicable. Record 999 if the volunteer cannot read the largest character. |
|-------------------------------------------------------------------------------------------------------------------------------------|

6. Regarding the best vision, either presenting or pinhole:

- 1  Both eyes are 20/40 or better
- 2  At least one eye is worse than 20/40 but vision has not decreased since baseline
- 3  At least one eye is worse than 20/40 and vision has decreased since baseline



# Visit 2 (6 Months)



Attach a PID label here:

7. Ask the volunteer, "Do you currently have any of the following eye problems?"

a. Blurry vision

0  No

1  Yes

d. Eye redness

0  No

1  Yes

b. Pain in eye

0  No

1  Yes

e. Itchy eyes

0  No

1  Yes

c. Sensitivity to light

0  No

1  Yes

f. Other; specify: \_\_\_\_\_

0  No

1  Yes

## H. Physical Exam

1. Head/face

1  Normal

2  Abnormal →

3  Not done

2. Mark all that apply.

1  Deformity

1  Asymmetry

1  Swelling

1  Other; specify: \_\_\_\_\_

3. Eyes

1  Normal

2  Abnormal →

3  Not done

4. Mark all that apply:

1  Eye redness

1  Other; specify: \_\_\_\_\_

1  Pupil abnormality

5. Ears, nose and throat

1  Normal

2  Abnormal →

3  Not done

6a. Nose

(Mark all that apply)

1  Deformity/mass

1  Mucosa

1  Ulcer

1  Other; specify: \_\_\_\_\_

6b. Ear

(Mark all that apply)

1  TM

1  Ext. canal

1  Hearing

1  Other; specify: \_\_\_\_\_

6c. Mouth/throat

(Mark all that apply)

1  Mucosa

1  Mass

1  Ulcer

1  Missing teeth

1  Dental caries

1  Other; specify: \_\_\_\_\_

7. Chest

1  Normal

2  Abnormal →

3  Not done

8. Mark all that apply.

1  Wheezes

1  Pericardial rub

1  Decreased breath sounds

1  Rales/crackles

1  Heart murmur

1  Other; specify: \_\_\_\_\_

# Visit 2 (6 Months)



Attach a PID label here:

## 9. Abdomen

- 1  Normal
- 2  Abnormal →
- 3  Not done

### 10. Mark all that apply.

- |                                         |                                                  |
|-----------------------------------------|--------------------------------------------------|
| 1 <input type="checkbox"/> Splenomegaly | 1 <input type="checkbox"/> Tenderness            |
| 1 <input type="checkbox"/> Hepatomegaly | 1 <input type="checkbox"/> Distension            |
| 1 <input type="checkbox"/> Mass         | 1 <input type="checkbox"/> Other; specify: _____ |

## 11. Extremities

- 1  Normal
- 2  Abnormal →
- 3  Not done

### 12. Mark all that apply.

- |                                      |                                                  |
|--------------------------------------|--------------------------------------------------|
| 1 <input type="checkbox"/> Deformity | 1 <input type="checkbox"/> Decreased pulse       |
| 1 <input type="checkbox"/> Edema     | 1 <input type="checkbox"/> Bruit                 |
| 1 <input type="checkbox"/> Cyanosis  | 1 <input type="checkbox"/> Other; specify: _____ |

## 13. Musculoskeletal

- 1  Normal
- 2  Abnormal →
- 3  Not done

### 14a. Muscles

(Mark all that apply)

- 1  Atrophy
- 1  Weakness
- 1  Tenderness
- 1  Other; specify: \_\_\_\_\_

### 14b. Joints

(Mark all that apply)

- 1  Swelling/effusion
- 1  Synovial tenderness
- 1  Deformity
- 1  Decreased ROM
- 1  Other; specify: \_\_\_\_\_

## 15. Neurologic

- 1  Normal
- 2  Abnormal →
- 3  Not done

### 16. Mark all that apply

- |                                             |                                                  |
|---------------------------------------------|--------------------------------------------------|
| 1 <input type="checkbox"/> Cognition        | 1 <input type="checkbox"/> Focal weakness        |
| 1 <input type="checkbox"/> Speech           | 1 <input type="checkbox"/> Gait/balance          |
| 1 <input type="checkbox"/> Tremor           | 1 <input type="checkbox"/> Sensory               |
| 1 <input type="checkbox"/> Reflexes         | 1 <input type="checkbox"/> Other; specify: _____ |
| 1 <input type="checkbox"/> Cranial nerve(s) |                                                  |

## 17. Skin

- 1  Normal
- 2  Abnormal →
- 3  Not done

### 18. Mark all that apply.

- |                                   |                                                  |
|-----------------------------------|--------------------------------------------------|
| 1 <input type="checkbox"/> Rash   | 1 <input type="checkbox"/> Jaundice              |
| 1 <input type="checkbox"/> Mass   | 1 <input type="checkbox"/> Pigmentation          |
| 1 <input type="checkbox"/> Lesion | 1 <input type="checkbox"/> Other; specify: _____ |

## 19. Breast

- 1  Normal
- 2  Abnormal →
- 3  Not done

### 20. Mark all that apply.

- |                                            |                                                  |
|--------------------------------------------|--------------------------------------------------|
| 1 <input type="checkbox"/> Mass            | 1 <input type="checkbox"/> Nipple discharge      |
| 1 <input type="checkbox"/> Skin retraction | 1 <input type="checkbox"/> Other; specify: _____ |

# Visit 2 (6 Months)



Attach a PID label here:

## I. Specimen Documentation

**Note: Blood samples are optional for volunteers < 12 years of age.**

1. Were the following specimens obtained:

a. Blood      0  No    1  Yes →

b. Urine      0  No    1  Yes →

**Kit Number Label here:**

Place 2nd Kit Number label here, if a 2nd kit is used:

2. Has the volunteer had anything to eat or drink (other than water) in the past 8 hours?

0  No

1  Yes

## J. Outcome

**Participants who are part of the longitudinal cohort should be referred to the JFK eye clinic for all new eye abnormalities. The longitudinal cohort is defined as all participants enrolled at JFK on or before March 31, 2016, and seen for a baseline eye exam on or before June 30, 2016.**

1. Will the volunteer be referred to an eye clinic?

0  No

1  Yes, JFK →

2. Reason (Mark all that apply):

1  Vision worse than 20/40 in either eye and decreased since baseline

1  Eye abnormality upon physical exam

1  Referred by staff, reason: \_\_\_\_\_

2  Yes, other eye clinic →

3. Reason: \_\_\_\_\_

4. Will the volunteer be referred for other medical care?

0  No

1  Yes →

5. Reason: \_\_\_\_\_

Signature: \_\_\_\_\_ Date: \_\_\_\_\_

# Visit 3 (12 Months)

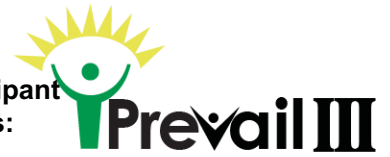

Attach a PID label here:

**Date of Visit:**

(example: 01-SEP-2018)

|     |  |       |  |      |   |   |
|-----|--|-------|--|------|---|---|
|     |  |       |  | 2    | 0 | 1 |
| Day |  | Month |  | Year |   |   |

Participant Initials: \_\_\_\_\_

Site: 

|  |  |
|--|--|
|  |  |
|--|--|

Complete this form for volunteers enrolled in the Ebola Natural History Study. If the volunteer is < 12 years old, also complete the Pediatric Supplement form.

**A. Clinical Information**

1. Weight: 

|  |  |  |
|--|--|--|
|  |  |  |
|--|--|--|

 . 

|  |
|--|
|  |
|--|

 kg

2. Height: 

|  |  |  |
|--|--|--|
|  |  |  |
|--|--|--|

 . 

|  |
|--|
|  |
|--|

 cm  
Complete for volunteers <18 years

3. Blood pressure: 

|  |  |  |
|--|--|--|
|  |  |  |
|--|--|--|

 / 

|  |  |  |
|--|--|--|
|  |  |  |
|--|--|--|

 mmHg (SBP/DBP)

4. Pulse: 

|  |  |  |
|--|--|--|
|  |  |  |
|--|--|--|

 beats per minute

5. Body temperature: 

|  |  |
|--|--|
|  |  |
|--|--|

 . 

|  |
|--|
|  |
|--|

 °C

6. Outcome of today's pregnancy test:  
 0  Negative  
 1  Positive  
 2  Not applicable (Male or female without child bearing potential)

**B. Review of Systems**

For each system, indicate whether the volunteer is experiencing any of the indicated symptoms.

**Mark all that apply**

|                                                                                               |                                                                                                                                                                                                                                                                                                                                                                                                                                                                      |
|-----------------------------------------------------------------------------------------------|----------------------------------------------------------------------------------------------------------------------------------------------------------------------------------------------------------------------------------------------------------------------------------------------------------------------------------------------------------------------------------------------------------------------------------------------------------------------|
| 1. Constitutional<br>0 <input type="checkbox"/> No<br>1 <input type="checkbox"/> Yes →        | 1 <input type="checkbox"/> Fever<br>1 <input type="checkbox"/> Chills<br>1 <input type="checkbox"/> Unusual night sweats<br>1 <input type="checkbox"/> Fatigue                                                                                                                                                                                                                                                                                                       |
| 2. Ears, nose and throat<br>0 <input type="checkbox"/> No<br>1 <input type="checkbox"/> Yes → | 1 <input type="checkbox"/> Decreased hearing<br>1 <input type="checkbox"/> Tinnitus<br>1 <input type="checkbox"/> Pain<br>1 <input type="checkbox"/> Discharge from ear<br>1 <input type="checkbox"/> Discharge from nose<br>1 <input type="checkbox"/> Hoarseness<br>1 <input type="checkbox"/> Nose bleeds                                                                                                                                                         |
| 3. Breast<br>0 <input type="checkbox"/> No<br>1 <input type="checkbox"/> Yes →                | 1 <input type="checkbox"/> Lumps<br>1 <input type="checkbox"/> Nipple discharge<br>1 <input type="checkbox"/> Pain                                                                                                                                                                                                                                                                                                                                                   |
| 4. Cardiovascular<br>0 <input type="checkbox"/> No<br>1 <input type="checkbox"/> Yes →        | 1 <input type="checkbox"/> Palpitations<br>1 <input type="checkbox"/> Chest pain<br>1 <input type="checkbox"/> Shortness of breath<br>1 <input type="checkbox"/> Paroxysmal nocturnal dyspnea<br>1 <input type="checkbox"/> Orthopnea<br>1 <input type="checkbox"/> Claudication (leg pain with walking)<br>1 <input type="checkbox"/> Edema                                                                                                                         |
| 5. Respiratory<br>0 <input type="checkbox"/> No<br>1 <input type="checkbox"/> Yes →           | 1 <input type="checkbox"/> Wheezing<br>1 <input type="checkbox"/> Dyspnea<br>1 <input type="checkbox"/> Cough/sputum<br>1 <input type="checkbox"/> Hemoptysis<br>1 <input type="checkbox"/> Positive TB skin test<br>1 <input type="checkbox"/> Nasal congestion                                                                                                                                                                                                     |
| 6. Gastrointestinal<br>0 <input type="checkbox"/> No<br>1 <input type="checkbox"/> Yes →      | 1 <input type="checkbox"/> Dysphagia<br>1 <input type="checkbox"/> Anorexia<br>1 <input type="checkbox"/> Nausea<br>1 <input type="checkbox"/> Vomiting<br>1 <input type="checkbox"/> Hematemesis<br>1 <input type="checkbox"/> Diarrhea<br>1 <input type="checkbox"/> Melena<br>1 <input type="checkbox"/> Rectal bleeding<br>1 <input type="checkbox"/> Change in bowel habits<br>1 <input type="checkbox"/> Jaundice<br>1 <input type="checkbox"/> Abdominal pain |

# Visit 3 (12 Months)



Attach a PID label here:

## Mark all that apply

|                                                                               |                                                                                                     |                                                                                                                                                                                                                                                                                    |                                                                                                                                                                                                                                                                          |
|-------------------------------------------------------------------------------|-----------------------------------------------------------------------------------------------------|------------------------------------------------------------------------------------------------------------------------------------------------------------------------------------------------------------------------------------------------------------------------------------|--------------------------------------------------------------------------------------------------------------------------------------------------------------------------------------------------------------------------------------------------------------------------|
| 7. Genito-urinary                                                             | 0 <input type="checkbox"/> No<br>1 <input type="checkbox"/> Yes →                                   | 1 <input type="checkbox"/> Dysuria<br>1 <input type="checkbox"/> Hematuria<br>1 <input type="checkbox"/> Frequency<br>1 <input type="checkbox"/> Polyuria                                                                                                                          | 1 <input type="checkbox"/> Urgency<br>1 <input type="checkbox"/> Hesitancy<br>1 <input type="checkbox"/> Incontinence<br>1 <input type="checkbox"/> Nocturia                                                                                                             |
| 8. Male reproductive                                                          | 0 <input type="checkbox"/> No<br>1 <input type="checkbox"/> Yes →<br>2 <input type="checkbox"/> N/A | 1 <input type="checkbox"/> Penile discharge<br>1 <input type="checkbox"/> Testicular pain or mass<br>1 <input type="checkbox"/> Infertility                                                                                                                                        | 1 <input type="checkbox"/> Impotence/decreased libido<br>1 <input type="checkbox"/> Orchitis (pain in groin)                                                                                                                                                             |
| 9. Female reproductive<br>(check "N/A" for<br>volunteers <12 years<br>of age) | 0 <input type="checkbox"/> No<br>1 <input type="checkbox"/> Yes →<br>2 <input type="checkbox"/> N/A | 1 <input type="checkbox"/> Menarche<br>1 <input type="checkbox"/> Menopause<br>1 <input type="checkbox"/> Postmenopausal symptoms<br>1 <input type="checkbox"/> Painful periods                                                                                                    | 1 <input type="checkbox"/> Odor<br>1 <input type="checkbox"/> Decreased libido<br>1 <input type="checkbox"/> Amenorrhea<br>1 <input type="checkbox"/> Abnormal vaginal bleeding                                                                                          |
| 10. Musculoskeletal                                                           | 0 <input type="checkbox"/> No<br>1 <input type="checkbox"/> Yes →                                   | 1 <input type="checkbox"/> Joint pain (mono or polyarticular)<br>1 <input type="checkbox"/> Edema<br>1 <input type="checkbox"/> Heat<br>1 <input type="checkbox"/> Redness                                                                                                         | 1 <input type="checkbox"/> Stiffness<br>1 <input type="checkbox"/> Deformity<br>1 <input type="checkbox"/> Muscle pain or tenderness                                                                                                                                     |
| 11. Neurological                                                              | 0 <input type="checkbox"/> No<br>1 <input type="checkbox"/> Yes →                                   | 1 <input type="checkbox"/> Headache<br>1 <input type="checkbox"/> Syncope<br>1 <input type="checkbox"/> Dizziness<br>1 <input type="checkbox"/> Vertigo<br>1 <input type="checkbox"/> Seizures<br>1 <input type="checkbox"/> Loss of vision<br>1 <input type="checkbox"/> Diplopia | 1 <input type="checkbox"/> Paresthesia<br>1 <input type="checkbox"/> Paralysis<br>1 <input type="checkbox"/> Weakness in any limbs<br>1 <input type="checkbox"/> Tremor<br>1 <input type="checkbox"/> Ataxia (balance problem)<br>1 <input type="checkbox"/> Memory loss |
| 12. Skin                                                                      | 0 <input type="checkbox"/> No<br>1 <input type="checkbox"/> Yes →                                   | 1 <input type="checkbox"/> Itching<br>1 <input type="checkbox"/> Rash<br>1 <input type="checkbox"/> Lumps and/or bumps                                                                                                                                                             | 1 <input type="checkbox"/> Hair and/or nail change<br>1 <input type="checkbox"/> Depigmentation<br>1 <input type="checkbox"/> Bruising                                                                                                                                   |
| 13. Lymphatic                                                                 | 0 <input type="checkbox"/> No<br>1 <input type="checkbox"/> Yes →                                   | 1 <input type="checkbox"/> Enlargement of lymph nodes                                                                                                                                                                                                                              |                                                                                                                                                                                                                                                                          |

# Visit 3 (12 Months)



Attach a PID label here:

## C. Diagnoses Since Last Visit

1. Were any of the following conditions diagnosed by a physician or health care worker since the volunteer's last study visit?

|                                                            | No                         | Yes                        | Date of Diagnosis<br>(e.g., MAY 2018) |                      |      |     |
|------------------------------------------------------------|----------------------------|----------------------------|---------------------------------------|----------------------|------|-----|
|                                                            |                            |                            | Month                                 |                      | Year |     |
| a. Diabetes (requiring insulin or oral hypoglycemic drugs) | 0 <input type="checkbox"/> | 1 <input type="checkbox"/> | <input type="text"/>                  | <input type="text"/> | 2    | 0 1 |
| b. Malaria                                                 | 0 <input type="checkbox"/> | 1 <input type="checkbox"/> | <input type="text"/>                  | <input type="text"/> | 2    | 0 1 |
| c. Tuberculosis                                            | 0 <input type="checkbox"/> | 1 <input type="checkbox"/> | <input type="text"/>                  | <input type="text"/> | 2    | 0 1 |
| d. Typhoid fever                                           | 0 <input type="checkbox"/> | 1 <input type="checkbox"/> | <input type="text"/>                  | <input type="text"/> | 2    | 0 1 |
| e. Pneumonia                                               | 0 <input type="checkbox"/> | 1 <input type="checkbox"/> | <input type="text"/>                  | <input type="text"/> | 2    | 0 1 |
| f. Urinary tract infection                                 | 0 <input type="checkbox"/> | 1 <input type="checkbox"/> | <input type="text"/>                  | <input type="text"/> | 2    | 0 1 |
| g. Hypertension                                            | 0 <input type="checkbox"/> | 1 <input type="checkbox"/> | <input type="text"/>                  | <input type="text"/> | 2    | 0 1 |
| h. Renal failure                                           | 0 <input type="checkbox"/> | 1 <input type="checkbox"/> | <input type="text"/>                  | <input type="text"/> | 2    | 0 1 |
| i. Stroke                                                  | 0 <input type="checkbox"/> | 1 <input type="checkbox"/> | <input type="text"/>                  | <input type="text"/> | 2    | 0 1 |

2. Has the volunteer been hospitalized since the last study visit?

0  No

1  Yes

3. Reason: \_\_\_\_\_

## D. Sexual Activity - Complete this section for volunteers aged 12 and older.

1. Has the volunteer been sexually active since the last visit?

0  No

1  Yes

2. Since the last visit, how often was a condom used during intercourse?

0  Never

1  Sometimes

2  Always

## E. Reproductive History - Females

1. Has the volunteer had a pregnancy outcome since the last study visit? (ask volunteers of child-bearing potential)

0  No

1  Yes

→ **Complete a Pregnancy Outcome form to document the outcome of this pregnancy.**

2. Is the volunteer currently using any hormonal contraceptive method other than condoms?

0  No

1  Yes

2  Not applicable

3. Mark all that apply:

1  Injectable

1  Oral medication

1  Implant

1  Other; specify: \_\_\_\_\_

4. Was the volunteer asked if she would be willing to provide a vaginal specimen?

0  No

1  Yes

5. Is the volunteer willing to provide this specimen?

0  No

1  Yes

→ **Perform or schedule a vaginal secretion collection visit.**

# Visit 3 (12 Months)

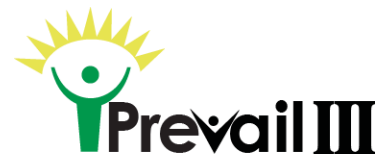

Attach a PID label here:

## F. Reproductive History - Males

Complete this section for every male volunteer aged 18 years and older.

1. Did your wife or partner experience a pregnancy since enrollment?

- 0  No
- 1  Yes
- 2  Not applicable

2. Was the volunteer asked if he would be willing to provide a semen sample?

- 0  No
- 1  Yes →

3. Is the volunteer willing to provide this specimen?

0  No

1  Yes → **Perform or schedule a semen collection visit.**

## G. Medications

Ask whether the volunteer takes any of the following types of drugs daily:

|                                                              | No                         | Yes                        |
|--------------------------------------------------------------|----------------------------|----------------------------|
| 1. Insulin                                                   | 0 <input type="checkbox"/> | 1 <input type="checkbox"/> |
| 2. Oral hypoglycemic agents for diabetes                     | 0 <input type="checkbox"/> | 1 <input type="checkbox"/> |
| 3. Blood pressure lowering drugs                             | 0 <input type="checkbox"/> | 1 <input type="checkbox"/> |
| 4. Drugs for HIV                                             | 0 <input type="checkbox"/> | 1 <input type="checkbox"/> |
| 5. Amphetamines or other stimulants                          | 0 <input type="checkbox"/> | 1 <input type="checkbox"/> |
| 6. Librium, Valium or other anti-anxiety agents              | 0 <input type="checkbox"/> | 1 <input type="checkbox"/> |
| 7. Acetaminophen                                             | 0 <input type="checkbox"/> | 1 <input type="checkbox"/> |
| 8. Non-steroidal anti-inflammatory agents (excludes aspirin) | 0 <input type="checkbox"/> | 1 <input type="checkbox"/> |
| 9. Aspirin                                                   | 0 <input type="checkbox"/> | 1 <input type="checkbox"/> |

## H. Vision Screening

1. Was vision screening performed?

- 1  No →
- 2  Yes

2. Reason: \_\_\_\_\_

**Go to Section I.**

3. Method of acuity testing

- 1  10 foot lane
- 2  Smart phone
- 3  Other; specify: \_\_\_\_\_

# Visit 3 (12 Months)



Attach a PID label here:

## 4. Presenting vision

a. Right eye: 20/

b. Left eye: 20/

c. Was this vision measured wearing spectacles?

0  No      1  Yes

Note: Have the volunteer wear their distance glasses, if applicable. Record 999 if the volunteer cannot read the largest character.

## 5. Pinhole test Perform for each eye with vision testing (see question H.4) worse than 20/40.

a. Right eye: 20/

b. Left eye: 20/

Note: Have the volunteer wear their distance glasses, if applicable. Record 999 if the volunteer cannot read the largest character.

## 6. Regarding the best vision, either presenting or pinhole:

- 1  Both eyes are 20/40 or better
- 2  At least one eye is worse than 20/40 but vision is not worse than the last reported vision
- 3  At least one eye is worse than 20/40 and vision is worse than the last reported vision

## 7. Ask the volunteer, "Do you currently have any of the following eye problems?"

a. Blurry vision

0  No  
1  Yes

d. Eye redness

0  No  
1  Yes

b. Pain in eye

0  No  
1  Yes

e. Itchy eyes

0  No  
1  Yes

c. Sensitivity to light

0  No  
1  Yes

f. Other; specify: \_\_\_\_\_

0  No  
1  Yes



# Visit 3 (12 Months)



Attach a PID label here:

## I. Physical Exam

### 1. Head/face

- 1  Normal
- 2  Abnormal →
- 3  Not done

#### 2. Mark all that apply.

- 1  Deformity
- 1  Swelling
- 1  Asymmetry
- 1  Other; specify: \_\_\_\_\_

### 3. Eyes

- 1  Normal
- 2  Abnormal →
- 3  Not done

#### 4. Mark all that apply:

- 1  Eye redness
- 1  Pupil abnormality
- 1  Other; specify: \_\_\_\_\_

### 5. Ears, nose and throat

- 1  Normal
- 2  Abnormal →
- 3  Not done

#### 6a. Nose

(Mark all that apply)

- 1  Deformity/mass
- 1  Mucosa
- 1  Ulcer
- 1  Other; specify: \_\_\_\_\_

#### 6b. Ear

(Mark all that apply)

- 1  TM
- 1  Ext. canal
- 1  Hearing
- 1  Other; specify: \_\_\_\_\_

#### 6c. Mouth/throat

(Mark all that apply)

- 1  Mucosa
- 1  Mass
- 1  Ulcer
- 1  Missing teeth
- 1  Dental caries
- 1  Other; specify: \_\_\_\_\_

### 7. Chest

- 1  Normal
- 2  Abnormal →
- 3  Not done

#### 8. Mark all that apply.

- 1  Wheezes
- 1  Decreased breath sounds
- 1  Heart murmur
- 1  Pericardial rub
- 1  Rales/crackles
- 1  Other; specify: \_\_\_\_\_

### 9. Abdomen

- 1  Normal
- 2  Abnormal →
- 3  Not done

#### 10. Mark all that apply.

- 1  Splenomegaly
- 1  Hepatomegaly
- 1  Mass
- 1  Tenderness
- 1  Distension
- 1  Other; specify: \_\_\_\_\_

### 11. Extremities

- 1  Normal
- 2  Abnormal →
- 3  Not done

#### 12. Mark all that apply.

- 1  Deformity
- 1  Edema
- 1  Cyanosis
- 1  Decreased pulse
- 1  Bruit
- 1  Other; specify: \_\_\_\_\_

# Visit 3 (12 Months)



Attach a PID label here:

## 13. Musculoskeletal

- 1  Normal
- 2  Abnormal →
- 3  Not done

|                                                  |                                                  |
|--------------------------------------------------|--------------------------------------------------|
| <b>14a. Muscles</b><br>(Mark all that apply)     | <b>14b. Joints</b><br>(Mark all that apply)      |
| 1 <input type="checkbox"/> Atrophy               | 1 <input type="checkbox"/> Swelling/effusion     |
| 1 <input type="checkbox"/> Weakness              | 1 <input type="checkbox"/> Synovial tenderness   |
| 1 <input type="checkbox"/> Tenderness            | 1 <input type="checkbox"/> Deformity             |
| 1 <input type="checkbox"/> Other; specify: _____ | 1 <input type="checkbox"/> Decreased ROM         |
|                                                  | 1 <input type="checkbox"/> Other; specify: _____ |

## 15. Neurologic

- 1  Normal
- 2  Abnormal →
- 3  Not done

|                                             |                                                  |
|---------------------------------------------|--------------------------------------------------|
| <b>16. Mark all that apply</b>              |                                                  |
| 1 <input type="checkbox"/> Cognition        | 1 <input type="checkbox"/> Focal weakness        |
| 1 <input type="checkbox"/> Speech           | 1 <input type="checkbox"/> Gait/balance          |
| 1 <input type="checkbox"/> Tremor           | 1 <input type="checkbox"/> Sensory               |
| 1 <input type="checkbox"/> Reflexes         | 1 <input type="checkbox"/> Other; specify: _____ |
| 1 <input type="checkbox"/> Cranial nerve(s) |                                                  |

## 17. Skin

- 1  Normal
- 2  Abnormal →
- 3  Not done

|                                   |                                                  |
|-----------------------------------|--------------------------------------------------|
| <b>18. Mark all that apply.</b>   |                                                  |
| 1 <input type="checkbox"/> Rash   | 1 <input type="checkbox"/> Jaundice              |
| 1 <input type="checkbox"/> Mass   | 1 <input type="checkbox"/> Pigmentation          |
| 1 <input type="checkbox"/> Lesion | 1 <input type="checkbox"/> Other; specify: _____ |

## 19. Breast

- 1  Normal
- 2  Abnormal →
- 3  Not done

|                                            |                                                  |
|--------------------------------------------|--------------------------------------------------|
| <b>20. Mark all that apply.</b>            |                                                  |
| 1 <input type="checkbox"/> Mass            | 1 <input type="checkbox"/> Nipple discharge      |
| 1 <input type="checkbox"/> Skin retraction | 1 <input type="checkbox"/> Other; specify: _____ |

## J. Rheumatology Training

1. Has the doctor performing the physical exam and review of symptoms received NIH-sponsored rheumatology training?

- 0  No
- 1  Yes

# Visit 3 (12 Months)

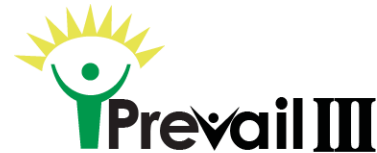

Attach a PID label here:

## K. Specimen Documentation

**Note: Blood samples are optional for volunteers < 12 years of age.**

1. Were the following specimens obtained:

a. Blood      0  No    1  Yes →

b. Urine      0  No    1  Yes →

**Kit Number Label here:**

Place 2nd Kit Number label here, if a 2nd kit is used:

2. Has the volunteer had anything to eat or drink (other than water) in the past 8 hours?

0  No

1  Yes

## L. Outcome

**Participants who are part of the longitudinal cohort should be referred to the JFK eye clinic for all new eye abnormalities. The longitudinal cohort is defined as all participants enrolled at JFK on or before March 31, 2016, and seen for a baseline eye exam on or before June 30, 2016.**

1. Will the volunteer be referred to an eye clinic?

0  No

1  Yes, JFK →

2. Reason (Mark all that apply):

1  Vision worse than 20/40 in either eye and decreased since last measurement

1  Eye abnormality upon physical exam

1  Referred by staff, reason: \_\_\_\_\_

2  Yes, other eye clinic →

3. Reason: \_\_\_\_\_

4. Will the volunteer be referred for other medical care?

0  No

1  Yes →

5. Reason: \_\_\_\_\_

6. Notes:

Signature: \_\_\_\_\_ Date: \_\_\_\_\_

# Baseline Ophthalmic Evaluation at JFK

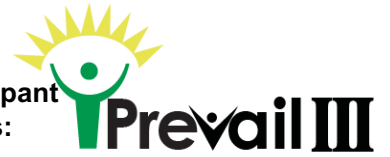

Attach a PID label here:

Visit Date:  
(example: 01-APR-2016)

|                      |                      |                      |                      |                      |                      |
|----------------------|----------------------|----------------------|----------------------|----------------------|----------------------|
| <input type="text"/> |
| Day                  |                      | Month                |                      | Year                 |                      |

Participant Initials: \_\_\_\_\_

Complete this form for volunteers enrolled in the Ebola Natural History Study. Complete as many fields as possible. Leave non-applicable fields blank.

## A. Detailed Eye Survey

Have you had...

| a. Condition                     | b. Eye(s)                     | c. Specify | d. Onset of 1st occurrence                                              |
|----------------------------------|-------------------------------|------------|-------------------------------------------------------------------------|
| 1. Problems with your eyes?      |                               |            |                                                                         |
| 0 <input type="checkbox"/> No    | 1 <input type="checkbox"/> OD | _____      | 1 <input type="checkbox"/> Prior to EVD event                           |
| 1 <input type="checkbox"/> Yes → | 1 <input type="checkbox"/> OS | _____      | 2 <input type="checkbox"/> During or after EVD event                    |
|                                  |                               |            | 3 <input type="checkbox"/> Volunteer is not enrolled as an EVD survivor |
| 2. Eye surgery?                  |                               |            |                                                                         |
| 0 <input type="checkbox"/> No    | 1 <input type="checkbox"/> OD | _____      | 1 <input type="checkbox"/> Prior to EVD event                           |
| 1 <input type="checkbox"/> Yes → | 1 <input type="checkbox"/> OS | _____      | 2 <input type="checkbox"/> During or after EVD event                    |
|                                  |                               |            | 3 <input type="checkbox"/> Volunteer is not enrolled as an EVD survivor |

Indicate any current or past problems with your eyes.

| a. Condition                                         | b. Current problem             | a. Condition                     | b. Current problem             |
|------------------------------------------------------|--------------------------------|----------------------------------|--------------------------------|
| 3. Pain in eye                                       |                                | 6. Trouble seeing                |                                |
| 0 <input type="checkbox"/> No                        |                                | 0 <input type="checkbox"/> No    | 0 <input type="checkbox"/> No  |
| 1 <input type="checkbox"/> Yes, mild →               | 0 <input type="checkbox"/> No  | 1 <input type="checkbox"/> Yes → | 1 <input type="checkbox"/> Yes |
| 2 <input type="checkbox"/> Yes, moderate or severe → | 1 <input type="checkbox"/> Yes |                                  |                                |
| 4. Sensitivity to light                              |                                | 7. Other; specify:               |                                |
| 0 <input type="checkbox"/> No                        |                                | _____                            | 0 <input type="checkbox"/> No  |
| 1 <input type="checkbox"/> Yes, mild →               | 0 <input type="checkbox"/> No  |                                  | 1 <input type="checkbox"/> Yes |
| 2 <input type="checkbox"/> Yes, moderate or severe → | 1 <input type="checkbox"/> Yes |                                  |                                |
| 5. Eye redness                                       |                                |                                  |                                |
| 0 <input type="checkbox"/> No                        |                                |                                  |                                |
| 1 <input type="checkbox"/> Yes, mild →               | 0 <input type="checkbox"/> No  |                                  |                                |
| 2 <input type="checkbox"/> Yes, moderate or severe → | 1 <input type="checkbox"/> Yes |                                  |                                |

8. Can a visual acuity exam be conducted on BOTH eyes?

0  No →

|                    |                            |                            |                                                                                                                                                      |                            |
|--------------------|----------------------------|----------------------------|------------------------------------------------------------------------------------------------------------------------------------------------------|----------------------------|
| 9. Reason:         | Eyes Effected              |                            | <p><b>If a visual assessment is not possible in EITHER eye, go to section C. If a visual assessment is possible in one eye, go to Section B.</b></p> |                            |
|                    | OD                         | OS                         |                                                                                                                                                      |                            |
|                    | a. Cognition problem       | 1 <input type="checkbox"/> |                                                                                                                                                      |                            |
|                    | b. Enucleation             | 1 <input type="checkbox"/> |                                                                                                                                                      | 1 <input type="checkbox"/> |
| c. Other; specify: | 1 <input type="checkbox"/> | 1 <input type="checkbox"/> |                                                                                                                                                      |                            |

1  Yes → **Go to Section B.**

# Baseline Ophthalmic Evaluation at JFK

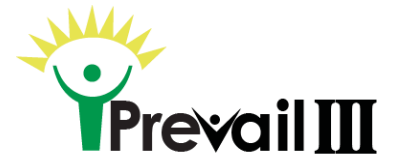

Attach a PID label here:

## B. Ophthalmic Exam - Part 1

Leave any items that were not assessed blank.

1. Visual acuity (Complete for adults and children for whom VA can be measured. For children in whom visual acuity cannot be measured answer Question 11 on the next page.)

|                               |                                                | a. Presenting dVA:                             |                                                | b. Pinhole dVA:                                |                                                |
|-------------------------------|------------------------------------------------|------------------------------------------------|------------------------------------------------|------------------------------------------------|------------------------------------------------|
|                               |                                                | OD                                             | OS                                             | OD                                             | OS                                             |
| 1 <input type="checkbox"/> SC | 20/                                            | <input type="text"/>                           | <input type="text"/>                           | 20/                                            | <input type="text"/>                           |
| 2 <input type="checkbox"/> CC |                                                |                                                |                                                |                                                |                                                |
|                               | <b>OR</b>                                      |                                                | <b>OR</b>                                      | <b>OR</b>                                      | <b>OR</b>                                      |
|                               | 1 <input type="checkbox"/> Count fingers       |
|                               | 2 <input type="checkbox"/> Hand motion         |
|                               | 3 <input type="checkbox"/> Light perception    |
|                               | 4 <input type="checkbox"/> No light perception |

2. Does the volunteer have an afferent pupillary defect?

0  No  
 1  Yes →

|                               |
|-------------------------------|
| 1 <input type="checkbox"/> OD |
| 1 <input type="checkbox"/> OS |

3. Motility

1  Full  
 2  Restricted:  
 \_\_\_\_\_

4. Color vision

OD: /14  
 OS: /14

5. Alignment:

1  Normal  
 2  Abnormal

6. Confrontational visual fields:

(counting fingers in four quadrants):  
 OD: OS:  
 1  Normal 1  Normal  
 2  Abnormal 2  Abnormal

7. IOP (mmHg):

OD:  OS:   
 Dilated at: \_\_\_\_\_  
*time*

8. Auto-refractor:

Check one:  
 OD: 1  -  .  +  .  X   
 2  +  .  +  .  X   
 OS: 1  -  .  +  .  X   
 2  +  .  +  .  X

9. Spherical equivalent

a. OD: 1  -  .   
 2  +  .   
 b. OS: 1  -  .   
 2  +  .   
 c. PD  .  mm

10. BCSEVA

OD: 20/  using 1  -  .   
 2  +  .   
 OS: 20/  using 1  -  .   
 2  +  .   
 ADD:  .  OU; NP:  cm

# Baseline Ophthalmic Evaluation at JFK

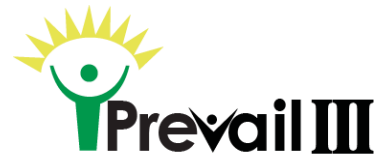

Attach a PID label here:

11. Alternate visual acuity measurements for children (complete for children for whom the VA above could not be measured):

|                                                                                                       |                                                                                                       |
|-------------------------------------------------------------------------------------------------------|-------------------------------------------------------------------------------------------------------|
| OD _____                                                                                              | OS _____                                                                                              |
| a. Fixes and follows:<br>0 <input type="checkbox"/> No    1 <input type="checkbox"/> Yes              | c. Fixes and follows:<br>0 <input type="checkbox"/> No    1 <input type="checkbox"/> Yes              |
| b. Central, steady and maintained:<br>0 <input type="checkbox"/> No    1 <input type="checkbox"/> Yes | d. Central, steady and maintained:<br>0 <input type="checkbox"/> No    1 <input type="checkbox"/> Yes |

12. Exam notes

|           | a. Central subfield thickness                                                                                   | b. Intraretinal fluid cysts?                                    | c. Epiretinal membrane?                                         | d. Retinal scar?                                                | e. Vitreous Opacities?                                                                                                         |
|-----------|-----------------------------------------------------------------------------------------------------------------|-----------------------------------------------------------------|-----------------------------------------------------------------|-----------------------------------------------------------------|--------------------------------------------------------------------------------------------------------------------------------|
| 13.<br>OD | <input type="text"/> <input type="text"/> <input type="text"/> <b>OR</b><br>0 <input type="checkbox"/> Not done | 0 <input type="checkbox"/> No<br>1 <input type="checkbox"/> Yes | 0 <input type="checkbox"/> No<br>1 <input type="checkbox"/> Yes | 0 <input type="checkbox"/> No<br>1 <input type="checkbox"/> Yes | 1 <input type="checkbox"/> None to minimal    3 <input type="checkbox"/> Moderate to severe<br>2 <input type="checkbox"/> Mild |
| 14.<br>OS | <input type="text"/> <input type="text"/> <input type="text"/> <b>OR</b><br>0 <input type="checkbox"/> Not done | 0 <input type="checkbox"/> No<br>1 <input type="checkbox"/> Yes | 0 <input type="checkbox"/> No<br>1 <input type="checkbox"/> Yes | 0 <input type="checkbox"/> No<br>1 <input type="checkbox"/> Yes | 1 <input type="checkbox"/> None to minimal    3 <input type="checkbox"/> Moderate to severe<br>2 <input type="checkbox"/> Mild |

15. Initials of person performing OCT:

16. Macula OCT notes:

# Baseline Ophthalmic Evaluation at JFK

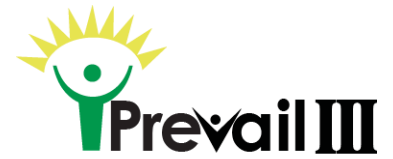

Attach a PID label here:

## C. Ophthalmic Exam - Part 2

| Physical                  | a. Right eye (Mark all that apply)    |                                                                                                                                                                                                                                                                                                                                                                                                                                                                                                                                                                                                                                                                                                                                                | b. Left eye (Mark all that apply)     |                                                                                                                                                                                                                                                                                                                                                                                                                                                                                                                                                                                                                                                                                                                                                |
|---------------------------|---------------------------------------|------------------------------------------------------------------------------------------------------------------------------------------------------------------------------------------------------------------------------------------------------------------------------------------------------------------------------------------------------------------------------------------------------------------------------------------------------------------------------------------------------------------------------------------------------------------------------------------------------------------------------------------------------------------------------------------------------------------------------------------------|---------------------------------------|------------------------------------------------------------------------------------------------------------------------------------------------------------------------------------------------------------------------------------------------------------------------------------------------------------------------------------------------------------------------------------------------------------------------------------------------------------------------------------------------------------------------------------------------------------------------------------------------------------------------------------------------------------------------------------------------------------------------------------------------|
| 1. Lids and lashes        | 1 <input type="checkbox"/> Normal     | 1 <input type="checkbox"/> Ptosis      1 <input type="checkbox"/> Other:<br>_____                                                                                                                                                                                                                                                                                                                                                                                                                                                                                                                                                                                                                                                              | 1 <input type="checkbox"/> Normal     | 1 <input type="checkbox"/> Ptosis      1 <input type="checkbox"/> Other:<br>_____                                                                                                                                                                                                                                                                                                                                                                                                                                                                                                                                                                                                                                                              |
| 2. Conjunctiva and sclera | 1 <input type="checkbox"/> White      | 1 <input type="checkbox"/> Injection      1 <input type="checkbox"/> Pterygium<br>1 <input type="checkbox"/> Pingueculum      1 <input type="checkbox"/> Other:<br>_____                                                                                                                                                                                                                                                                                                                                                                                                                                                                                                                                                                       | 1 <input type="checkbox"/> White      | 1 <input type="checkbox"/> Injection      1 <input type="checkbox"/> Pterygium<br>1 <input type="checkbox"/> Pingueculum      1 <input type="checkbox"/> Other:<br>_____                                                                                                                                                                                                                                                                                                                                                                                                                                                                                                                                                                       |
| 3. Cornea                 | 1 <input type="checkbox"/> Clear      | 1 <input type="checkbox"/> SPK      1 <input type="checkbox"/> KPs<br>1 <input type="checkbox"/> Scar      1 <input type="checkbox"/> Other:<br>_____                                                                                                                                                                                                                                                                                                                                                                                                                                                                                                                                                                                          | 1 <input type="checkbox"/> Clear      | 1 <input type="checkbox"/> SPK      1 <input type="checkbox"/> KPs<br>1 <input type="checkbox"/> Scar      1 <input type="checkbox"/> Other:<br>_____                                                                                                                                                                                                                                                                                                                                                                                                                                                                                                                                                                                          |
| 4. Anterior chamber       | 1 <input type="checkbox"/> Deep/quiet | 1 <input type="checkbox"/> Cells<br>1 <input type="checkbox"/> Trace (1-5)<br>2 <input type="checkbox"/> 1 (6-15)<br>3 <input type="checkbox"/> 2 (16-25)<br>4 <input type="checkbox"/> 3 (26-50)<br>5 <input type="checkbox"/> 4+ (>50)<br><br>1 <input type="checkbox"/> Flare<br>1 <input type="checkbox"/> Trace<br>2 <input type="checkbox"/> 1 (faint, barely detectable)<br>3 <input type="checkbox"/> 2 (moderate; iris/lens clear)<br>4 <input type="checkbox"/> 3 (marked; iris/lens details hazy)<br>5 <input type="checkbox"/> 4+ (intense, fixed coagulated aqueous humor, fibrin present)<br><br>1 <input type="checkbox"/> Hypopyon: <input type="text"/> <input type="text"/> mm<br>1 <input type="checkbox"/> Other:<br>_____ | 1 <input type="checkbox"/> Deep/quiet | 1 <input type="checkbox"/> Cells<br>1 <input type="checkbox"/> Trace (1-5)<br>2 <input type="checkbox"/> 1 (6-15)<br>3 <input type="checkbox"/> 2 (16-25)<br>4 <input type="checkbox"/> 3 (26-50)<br>5 <input type="checkbox"/> 4+ (>50)<br><br>1 <input type="checkbox"/> Flare<br>1 <input type="checkbox"/> Trace<br>2 <input type="checkbox"/> 1 (faint, barely detectable)<br>3 <input type="checkbox"/> 2 (moderate; iris/lens clear)<br>4 <input type="checkbox"/> 3 (marked; iris/lens details hazy)<br>5 <input type="checkbox"/> 4+ (intense, fixed coagulated aqueous humor, fibrin present)<br><br>1 <input type="checkbox"/> Hypopyon: <input type="text"/> <input type="text"/> mm<br>1 <input type="checkbox"/> Other:<br>_____ |
| 5. Iris                   | 1 <input type="checkbox"/> Round      | 1 <input type="checkbox"/> Synechiae      1 <input type="checkbox"/> NV<br>1 <input type="checkbox"/> Atrophy      1 <input type="checkbox"/> Other:<br>_____                                                                                                                                                                                                                                                                                                                                                                                                                                                                                                                                                                                  | 1 <input type="checkbox"/> Round      | 1 <input type="checkbox"/> Synechiae      1 <input type="checkbox"/> NV<br>1 <input type="checkbox"/> Atrophy      1 <input type="checkbox"/> Other:<br>_____                                                                                                                                                                                                                                                                                                                                                                                                                                                                                                                                                                                  |
| 6. Lens                   | 1 <input type="checkbox"/> Clear      | 1 <input type="checkbox"/> Nuclear cataract      1 <input type="checkbox"/> PSC<br>1 <input type="checkbox"/> Cortical cataract      1 <input type="checkbox"/> IOL<br>1 <input type="checkbox"/> ASC      1 <input type="checkbox"/> Other:<br>_____                                                                                                                                                                                                                                                                                                                                                                                                                                                                                          | 1 <input type="checkbox"/> Clear      | 1 <input type="checkbox"/> Nuclear cataract      1 <input type="checkbox"/> PSC<br>1 <input type="checkbox"/> Cortical cataract      1 <input type="checkbox"/> IOL<br>1 <input type="checkbox"/> ASC      1 <input type="checkbox"/> Other:<br>_____                                                                                                                                                                                                                                                                                                                                                                                                                                                                                          |

# Baseline Ophthalmic Evaluation at JFK



Attach a PID label here:

| Physical       | a. Right eye (Mark all that apply)                                                                                                                               |                                                                                                                                                                                                                                                                                                                                                                                                                                                                                                                                                                                                                                                                                                                                                                                             | b. Left eye (Mark all that apply)                                                                                                                                |                                                                                                                                                                                                                                                                                                                                                                                                                                                                                                                                                                                                                                                                                                                                                                                             |
|----------------|------------------------------------------------------------------------------------------------------------------------------------------------------------------|---------------------------------------------------------------------------------------------------------------------------------------------------------------------------------------------------------------------------------------------------------------------------------------------------------------------------------------------------------------------------------------------------------------------------------------------------------------------------------------------------------------------------------------------------------------------------------------------------------------------------------------------------------------------------------------------------------------------------------------------------------------------------------------------|------------------------------------------------------------------------------------------------------------------------------------------------------------------|---------------------------------------------------------------------------------------------------------------------------------------------------------------------------------------------------------------------------------------------------------------------------------------------------------------------------------------------------------------------------------------------------------------------------------------------------------------------------------------------------------------------------------------------------------------------------------------------------------------------------------------------------------------------------------------------------------------------------------------------------------------------------------------------|
| 7. Vitreous    | <input type="checkbox"/> Clear<br><input type="checkbox"/> No view                                                                                               | 1 <input type="checkbox"/> Cells<br>1 <input type="checkbox"/> Trace (2-20)<br>2 <input type="checkbox"/> 1 (21-50)<br>3 <input type="checkbox"/> 2 (51-100)<br>4 <input type="checkbox"/> 3 (101-250)<br>5 <input type="checkbox"/> 4+ (>250)<br><br>1 <input type="checkbox"/> Haze<br>1 <input type="checkbox"/> Trace<br>2 <input type="checkbox"/> 1 (few opacities, mild blurring)<br>3 <input type="checkbox"/> 2 (significant blurring, still visible)<br>4 <input type="checkbox"/> 3 (Optic nerve visible, no vessels seen)<br>5 <input type="checkbox"/> 4+ (dense opacity obscures optic nerve head)<br><br>1 <input type="checkbox"/> PVD            1 <input type="checkbox"/> Clumping<br>1 <input type="checkbox"/> Syneresis    1 <input type="checkbox"/> Other:<br>_____ | <input type="checkbox"/> Clear<br><input type="checkbox"/> No view                                                                                               | 1 <input type="checkbox"/> Cells<br>1 <input type="checkbox"/> Trace (2-20)<br>2 <input type="checkbox"/> 1 (21-50)<br>3 <input type="checkbox"/> 2 (51-100)<br>4 <input type="checkbox"/> 3 (101-250)<br>5 <input type="checkbox"/> 4+ (>250)<br><br>1 <input type="checkbox"/> Haze<br>1 <input type="checkbox"/> Trace<br>2 <input type="checkbox"/> 1 (few opacities, mild blurring)<br>3 <input type="checkbox"/> 2 (significant blurring, still visible)<br>4 <input type="checkbox"/> 3 (Optic nerve visible, no vessels seen)<br>5 <input type="checkbox"/> 4+ (dense opacity obscures optic nerve head)<br><br>1 <input type="checkbox"/> PVD            1 <input type="checkbox"/> Clumping<br>1 <input type="checkbox"/> Syneresis    1 <input type="checkbox"/> Other:<br>_____ |
| 8. Optic nerve | 1 <input type="checkbox"/> Sharp/pink<br>Cup to disk ratio: <input type="text"/> <input type="text"/> <input type="text"/><br>1 <input type="checkbox"/> No view | 1 <input type="checkbox"/> Swollen            1 <input type="checkbox"/> Gliosis<br>1 <input type="checkbox"/> Pale<br>1 <input type="checkbox"/> Cupped            1 <input type="checkbox"/> Other:<br>_____                                                                                                                                                                                                                                                                                                                                                                                                                                                                                                                                                                              | 1 <input type="checkbox"/> Sharp/pink<br>Cup to disk ratio: <input type="text"/> <input type="text"/> <input type="text"/><br>1 <input type="checkbox"/> No view | 1 <input type="checkbox"/> Swollen            1 <input type="checkbox"/> Gliosis<br>1 <input type="checkbox"/> Pale<br>1 <input type="checkbox"/> Cupped            1 <input type="checkbox"/> Other:<br>_____                                                                                                                                                                                                                                                                                                                                                                                                                                                                                                                                                                              |
| 9. Macula      | 1 <input type="checkbox"/> Normal<br>1 <input type="checkbox"/> No view                                                                                          | 1 <input type="checkbox"/> Hemorrhage    1 <input type="checkbox"/> CWS<br>1 <input type="checkbox"/> Edema            1 <input type="checkbox"/> Vascular sheathing<br>1 <input type="checkbox"/> ERM<br>1 <input type="checkbox"/> Scar                1 <input type="checkbox"/> Other:<br>_____                                                                                                                                                                                                                                                                                                                                                                                                                                                                                         | 1 <input type="checkbox"/> Normal<br>1 <input type="checkbox"/> No view                                                                                          | 1 <input type="checkbox"/> Hemorrhage    1 <input type="checkbox"/> CWS<br>1 <input type="checkbox"/> Edema            1 <input type="checkbox"/> Vascular sheathing<br>1 <input type="checkbox"/> ERM<br>1 <input type="checkbox"/> Scar                1 <input type="checkbox"/> Other:<br>_____                                                                                                                                                                                                                                                                                                                                                                                                                                                                                         |
| 10. Periphery  | 1 <input type="checkbox"/> Attached<br>1 <input type="checkbox"/> No view                                                                                        | 1 <input type="checkbox"/> Hemorrhage    1 <input type="checkbox"/> Detachment<br>1 <input type="checkbox"/> Scar                1 <input type="checkbox"/> Other:<br>_____                                                                                                                                                                                                                                                                                                                                                                                                                                                                                                                                                                                                                 | 1 <input type="checkbox"/> Attached<br>1 <input type="checkbox"/> No view                                                                                        | 1 <input type="checkbox"/> Hemorrhage    1 <input type="checkbox"/> Detachment<br>1 <input type="checkbox"/> Scar                1 <input type="checkbox"/> Other:<br>_____                                                                                                                                                                                                                                                                                                                                                                                                                                                                                                                                                                                                                 |



# Baseline Ophthalmic Evaluation at JFK

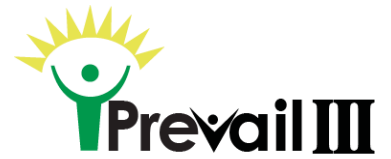

Attach a PID label here:

## 11. Assessment - Mark all that apply:

- |                       | Eyes affected              |                            |
|-----------------------|----------------------------|----------------------------|
|                       | OD                         | OS                         |
| a. Uveitis            | 1 <input type="checkbox"/> | 1 <input type="checkbox"/> |
| b. Cataract           | 1 <input type="checkbox"/> | 1 <input type="checkbox"/> |
| c. Pseudophakia       | 1 <input type="checkbox"/> | 1 <input type="checkbox"/> |
| d. Macular edema      | 1 <input type="checkbox"/> | 1 <input type="checkbox"/> |
| e. Retinal scar       | 1 <input type="checkbox"/> | 1 <input type="checkbox"/> |
| f. UV sun damage      | 1 <input type="checkbox"/> | 1 <input type="checkbox"/> |
| g. Retinal detachment | 1 <input type="checkbox"/> | 1 <input type="checkbox"/> |
| h. Dry eye            | 1 <input type="checkbox"/> |                            |
| i. Presbyopia         | 1 <input type="checkbox"/> |                            |
| j. Ocular allergy     | 1 <input type="checkbox"/> |                            |

12. If present, uveitis is:

1  Active 2  Inactive 3  Unclear

k. Other; specify: \_\_\_\_\_

l. Other; specify: \_\_\_\_\_

m. Other; specify: \_\_\_\_\_

n. Other; specify: \_\_\_\_\_

o. Other; specify: \_\_\_\_\_

|                          | Eyes affected              |                            |                            |
|--------------------------|----------------------------|----------------------------|----------------------------|
|                          | N/A                        | OD                         | OS                         |
| k. Other; specify: _____ | 1 <input type="checkbox"/> | 1 <input type="checkbox"/> | 1 <input type="checkbox"/> |
| l. Other; specify: _____ | 1 <input type="checkbox"/> | 1 <input type="checkbox"/> | 1 <input type="checkbox"/> |
| m. Other; specify: _____ | 1 <input type="checkbox"/> | 1 <input type="checkbox"/> | 1 <input type="checkbox"/> |
| n. Other; specify: _____ | 1 <input type="checkbox"/> | 1 <input type="checkbox"/> | 1 <input type="checkbox"/> |
| o. Other; specify: _____ | 1 <input type="checkbox"/> | 1 <input type="checkbox"/> | 1 <input type="checkbox"/> |

## 13. Plan (Mark all that apply)

- 1  Prednisolone acetate
- 1  Artificial tears
- 1  Reading glasses
- 1  Custom glasses
- 1  Surgical consideration

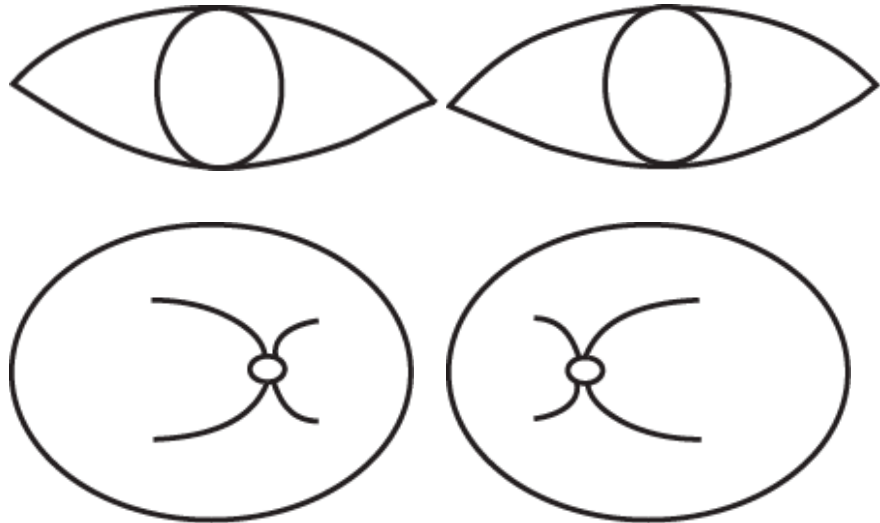

## 14. Will the volunteer be scheduled for clinical follow-up?

- 0  No
- 1  Yes

### D. Assessment and plan:

### E. Follow-up:

### F. Notes:

Initials of providers:

Signature: \_\_\_\_\_ Date: \_\_\_\_\_

# Follow-up Ophthalmic Evaluation at JFK

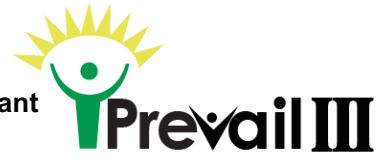

Attach a PID label here:

Timepoint:

- 1  Year 1      4  Year 4  
 2  Year 2      5  Year 5  
 3  Year 3

Participant Initials: \_\_\_\_\_

Complete this form for volunteers of PREVAIL III who are attending annual data collection visits for a follow-up eye evaluation.

(example: 01-FEB-2017)

Visit Date:   /   /

Day                      Month                      Year

## A. Interim History

1. Ask the volunteer...

|                                       | No                         | Yes                        | Note  |
|---------------------------------------|----------------------------|----------------------------|-------|
| a. Do you have problems with vision?  | 0 <input type="checkbox"/> | 1 <input type="checkbox"/> | _____ |
| b. Do you have other eye problems?    | 0 <input type="checkbox"/> | 1 <input type="checkbox"/> | _____ |
| c. Are you using any eye medications? | 0 <input type="checkbox"/> | 1 <input type="checkbox"/> | _____ |

2. Can a visual acuity exam be conducted on BOTH eyes?

0  No →

3. Reason:

|                      | Eyes Effected              |                            |
|----------------------|----------------------------|----------------------------|
|                      | OD                         | OS                         |
| a. Cognition problem | 1 <input type="checkbox"/> |                            |
| b. Enucleation       | 1 <input type="checkbox"/> | 1 <input type="checkbox"/> |
| c. Other; specify:   | 1 <input type="checkbox"/> | 1 <input type="checkbox"/> |

\_\_\_\_\_

**If a visual assessment is not possible in EITHER eye, go to section C. If a visual assessment is possible in one eye, go to Section B.**

1  Yes → **Go to Section B.**

## B. Ophthalmic Exam - Part 1

1. Notes:

# Follow-up Ophthalmic Evaluation at JFK



Attach a PID label here:

Timepoint:

- 1  Year 1      4  Year 4  
 2  Year 2      5  Year 5  
 3  Year 3

Leave any items that were not assessed blank.

2. Visual acuity (complete for adults and children for whom VA can be measured.)

|                                                                |     |                                                |                                                                 |                                                |                                                                 |                 |     |                                                                 |                                                                 |
|----------------------------------------------------------------|-----|------------------------------------------------|-----------------------------------------------------------------|------------------------------------------------|-----------------------------------------------------------------|-----------------|-----|-----------------------------------------------------------------|-----------------------------------------------------------------|
|                                                                |     | a. Presenting dVA:                             |                                                                 |                                                |                                                                 | c. Pinhole dVA: |     |                                                                 |                                                                 |
|                                                                |     | OD                                             | OS                                                              | OD                                             | OS                                                              |                 |     |                                                                 |                                                                 |
| 1 <input type="checkbox"/> SC<br>2 <input type="checkbox"/> CC | 20/ |                                                |                                                                 | 20/                                            |                                                                 |                 | 20/ |                                                                 |                                                                 |
|                                                                |     | <b>OR</b>                                      | <b>OR</b>                                                       | <b>OR</b>                                      | <b>OR</b>                                                       |                 |     |                                                                 |                                                                 |
|                                                                |     | 1 <input type="checkbox"/> Count fingers       | 1 <input type="checkbox"/> Count fingers                        | 1 <input type="checkbox"/> Count fingers       | 1 <input type="checkbox"/> Count fingers                        |                 |     |                                                                 |                                                                 |
|                                                                |     | 2 <input type="checkbox"/> Hand motion         | 2 <input type="checkbox"/> Hand motion                          | 2 <input type="checkbox"/> Hand motion         | 2 <input type="checkbox"/> Hand motion                          |                 |     |                                                                 |                                                                 |
|                                                                |     | 3 <input type="checkbox"/> Light perception    | 3 <input type="checkbox"/> Light perception                     | 3 <input type="checkbox"/> Light perception    | 3 <input type="checkbox"/> Light perception                     |                 |     |                                                                 |                                                                 |
|                                                                |     | 4 <input type="checkbox"/> No light perception | 4 <input type="checkbox"/> No light perception                  | 4 <input type="checkbox"/> No light perception | 4 <input type="checkbox"/> No light perception                  |                 |     |                                                                 |                                                                 |
| b. ETDRS:                                                      |     | 1 <input type="checkbox"/> SC                  | <input style="width: 30px; height: 20px;" type="text"/> letters | 1 <input type="checkbox"/> SC                  | <input style="width: 30px; height: 20px;" type="text"/> letters | d.              |     | <input style="width: 30px; height: 20px;" type="text"/> letters | <input style="width: 30px; height: 20px;" type="text"/> letters |
|                                                                |     | 2 <input type="checkbox"/> CC                  |                                                                 | 2 <input type="checkbox"/> CC                  |                                                                 |                 |     |                                                                 |                                                                 |

3. Alternate visual acuity measurements for children (complete for children for whom the VA above could not be measured):

|                                                                                                       |                                                                                                       |
|-------------------------------------------------------------------------------------------------------|-------------------------------------------------------------------------------------------------------|
| OD                                                                                                    | OS                                                                                                    |
| a. Fixes and follows:<br>0 <input type="checkbox"/> No    1 <input type="checkbox"/> Yes              | c. Fixes and follows:<br>0 <input type="checkbox"/> No    1 <input type="checkbox"/> Yes              |
| b. Central, steady and maintained:<br>0 <input type="checkbox"/> No    1 <input type="checkbox"/> Yes | d. Central, steady and maintained:<br>0 <input type="checkbox"/> No    1 <input type="checkbox"/> Yes |

4. Does the volunteer have an afferent pupillary defect?

0  No  
 1  Yes → 1  OD  
1  OS

5. IOP (mmHg):

OD:     OS:   
 Dilated at: \_\_\_\_\_  
*time*

6. Color plates:

OD:  /14  
 OS:  /14

|       | a. Central subfield thickness                                                                            | b. Intraretinal fluid cysts?                                    | c. Epiretinal membrane?                                         | d. Retinal scar?                                                | e. Vitreous Opacities?                                                                                                         |
|-------|----------------------------------------------------------------------------------------------------------|-----------------------------------------------------------------|-----------------------------------------------------------------|-----------------------------------------------------------------|--------------------------------------------------------------------------------------------------------------------------------|
| 7. OD | <input style="width: 30px; height: 20px;" type="text"/> <b>OR</b><br>0 <input type="checkbox"/> Not done | 0 <input type="checkbox"/> No<br>1 <input type="checkbox"/> Yes | 0 <input type="checkbox"/> No<br>1 <input type="checkbox"/> Yes | 0 <input type="checkbox"/> No<br>1 <input type="checkbox"/> Yes | 1 <input type="checkbox"/> None to minimal    3 <input type="checkbox"/> Moderate to severe<br>2 <input type="checkbox"/> Mild |
| 8. OS | <input style="width: 30px; height: 20px;" type="text"/> <b>OR</b><br>0 <input type="checkbox"/> Not done | 0 <input type="checkbox"/> No<br>1 <input type="checkbox"/> Yes | 0 <input type="checkbox"/> No<br>1 <input type="checkbox"/> Yes | 0 <input type="checkbox"/> No<br>1 <input type="checkbox"/> Yes | 1 <input type="checkbox"/> None to minimal    3 <input type="checkbox"/> Moderate to severe<br>2 <input type="checkbox"/> Mild |

9. Initials of person performing OCT:

10. Macula OCT comments:

# Follow-up Ophthalmic Evaluation at JFK



Attach a PID label here:

Timepoint:

- 1  Year 1      4  Year 4  
 2  Year 2      5  Year 5  
 3  Year 3

## C. Ophthalmic Exam - Part 2

| Physical                  | a. Right eye (Mark all that apply)    |                                                                                                                                                                                                                                                                                                                                                                                                                                                                                                                                                                                                                                                                                                                                                | b. Left eye (Mark all that apply)     |                                                                                                                                                                                                                                                                                                                                                                                                                                                                                                                                                                                                                                                                                                                                                |
|---------------------------|---------------------------------------|------------------------------------------------------------------------------------------------------------------------------------------------------------------------------------------------------------------------------------------------------------------------------------------------------------------------------------------------------------------------------------------------------------------------------------------------------------------------------------------------------------------------------------------------------------------------------------------------------------------------------------------------------------------------------------------------------------------------------------------------|---------------------------------------|------------------------------------------------------------------------------------------------------------------------------------------------------------------------------------------------------------------------------------------------------------------------------------------------------------------------------------------------------------------------------------------------------------------------------------------------------------------------------------------------------------------------------------------------------------------------------------------------------------------------------------------------------------------------------------------------------------------------------------------------|
| 1. Lids and lashes        | 1 <input type="checkbox"/> Normal     | 1 <input type="checkbox"/> Ptosis      1 <input type="checkbox"/> Other:<br>_____                                                                                                                                                                                                                                                                                                                                                                                                                                                                                                                                                                                                                                                              | 1 <input type="checkbox"/> Normal     | 1 <input type="checkbox"/> Ptosis      1 <input type="checkbox"/> Other:<br>_____                                                                                                                                                                                                                                                                                                                                                                                                                                                                                                                                                                                                                                                              |
| 2. Conjunctiva and sclera | 1 <input type="checkbox"/> White      | 1 <input type="checkbox"/> Injection      1 <input type="checkbox"/> Pterygium<br>1 <input type="checkbox"/> Pingueculum      1 <input type="checkbox"/> Other:<br>_____                                                                                                                                                                                                                                                                                                                                                                                                                                                                                                                                                                       | 1 <input type="checkbox"/> White      | 1 <input type="checkbox"/> Injection      1 <input type="checkbox"/> Pterygium<br>1 <input type="checkbox"/> Pingueculum      1 <input type="checkbox"/> Other:<br>_____                                                                                                                                                                                                                                                                                                                                                                                                                                                                                                                                                                       |
| 3. Cornea                 | 1 <input type="checkbox"/> Clear      | 1 <input type="checkbox"/> SPK      1 <input type="checkbox"/> KPs<br>1 <input type="checkbox"/> Scar      1 <input type="checkbox"/> Other:<br>_____                                                                                                                                                                                                                                                                                                                                                                                                                                                                                                                                                                                          | 1 <input type="checkbox"/> Clear      | 1 <input type="checkbox"/> SPK      1 <input type="checkbox"/> KPs<br>1 <input type="checkbox"/> Scar      1 <input type="checkbox"/> Other:<br>_____                                                                                                                                                                                                                                                                                                                                                                                                                                                                                                                                                                                          |
| 4. Anterior chamber       | 1 <input type="checkbox"/> Deep/quiet | 1 <input type="checkbox"/> Cells<br>1 <input type="checkbox"/> Trace (1-5)<br>2 <input type="checkbox"/> 1 (6-15)<br>3 <input type="checkbox"/> 2 (16-25)<br>4 <input type="checkbox"/> 3 (26-50)<br>5 <input type="checkbox"/> 4+ (>50)<br><br>1 <input type="checkbox"/> Flare<br>1 <input type="checkbox"/> Trace<br>2 <input type="checkbox"/> 1 (faint, barely detectable)<br>3 <input type="checkbox"/> 2 (moderate; iris/lens clear)<br>4 <input type="checkbox"/> 3 (marked; iris/lens details hazy)<br>5 <input type="checkbox"/> 4+ (intense, fixed coagulated aqueous humor, fibrin present)<br><br>1 <input type="checkbox"/> Hypopyon: <input type="text"/> <input type="text"/> mm<br>1 <input type="checkbox"/> Other:<br>_____ | 1 <input type="checkbox"/> Deep/quiet | 1 <input type="checkbox"/> Cells<br>1 <input type="checkbox"/> Trace (1-5)<br>2 <input type="checkbox"/> 1 (6-15)<br>3 <input type="checkbox"/> 2 (16-25)<br>4 <input type="checkbox"/> 3 (26-50)<br>5 <input type="checkbox"/> 4+ (>50)<br><br>1 <input type="checkbox"/> Flare<br>1 <input type="checkbox"/> Trace<br>2 <input type="checkbox"/> 1 (faint, barely detectable)<br>3 <input type="checkbox"/> 2 (moderate; iris/lens clear)<br>4 <input type="checkbox"/> 3 (marked; iris/lens details hazy)<br>5 <input type="checkbox"/> 4+ (intense, fixed coagulated aqueous humor, fibrin present)<br><br>1 <input type="checkbox"/> Hypopyon: <input type="text"/> <input type="text"/> mm<br>1 <input type="checkbox"/> Other:<br>_____ |
| 5. Iris                   | 1 <input type="checkbox"/> Round      | 1 <input type="checkbox"/> Synechiae      1 <input type="checkbox"/> NV<br>1 <input type="checkbox"/> Atrophy      1 <input type="checkbox"/> Other:<br>_____                                                                                                                                                                                                                                                                                                                                                                                                                                                                                                                                                                                  | 1 <input type="checkbox"/> Round      | 1 <input type="checkbox"/> Synechiae      1 <input type="checkbox"/> NV<br>1 <input type="checkbox"/> Atrophy      1 <input type="checkbox"/> Other:<br>_____                                                                                                                                                                                                                                                                                                                                                                                                                                                                                                                                                                                  |
| 6. Lens                   | 1 <input type="checkbox"/> Clear      | 1 <input type="checkbox"/> Nuclear cataract      1 <input type="checkbox"/> PSC<br>1 <input type="checkbox"/> Cortical cataract      1 <input type="checkbox"/> IOL<br>1 <input type="checkbox"/> ASC      1 <input type="checkbox"/> Other:<br>_____                                                                                                                                                                                                                                                                                                                                                                                                                                                                                          | 1 <input type="checkbox"/> Clear      | 1 <input type="checkbox"/> Nuclear cataract      1 <input type="checkbox"/> PSC<br>1 <input type="checkbox"/> Cortical cataract      1 <input type="checkbox"/> IOL<br>1 <input type="checkbox"/> ASC      1 <input type="checkbox"/> Other:<br>_____                                                                                                                                                                                                                                                                                                                                                                                                                                                                                          |

# Follow-up Ophthalmic Evaluation at JFK



Attach a PID label here:

Timepoint:

- 1  Year 1      4  Year 4  
 2  Year 2      5  Year 5  
 3  Year 3

| Physical       | a. Right eye (Mark all that apply)                                                                                                                               |                                                                                                                                                                                                                                                                                                                                                                                                                                                                                                                                                                                                                                                                                                                                                                                                   | b. Left eye (Mark all that apply)                                                                                                                                |                                                                                                                                                                                                                                                                                                                                                                                                                                                                                                                                                                                                                                                                                                                                                                                                   |
|----------------|------------------------------------------------------------------------------------------------------------------------------------------------------------------|---------------------------------------------------------------------------------------------------------------------------------------------------------------------------------------------------------------------------------------------------------------------------------------------------------------------------------------------------------------------------------------------------------------------------------------------------------------------------------------------------------------------------------------------------------------------------------------------------------------------------------------------------------------------------------------------------------------------------------------------------------------------------------------------------|------------------------------------------------------------------------------------------------------------------------------------------------------------------|---------------------------------------------------------------------------------------------------------------------------------------------------------------------------------------------------------------------------------------------------------------------------------------------------------------------------------------------------------------------------------------------------------------------------------------------------------------------------------------------------------------------------------------------------------------------------------------------------------------------------------------------------------------------------------------------------------------------------------------------------------------------------------------------------|
| 7. Vitreous    | 1 <input type="checkbox"/> Clear<br>1 <input type="checkbox"/> No view                                                                                           | 1 <input type="checkbox"/> Cells<br>1 <input type="checkbox"/> Trace (2-20)<br>2 <input type="checkbox"/> 1 (21-50)<br>3 <input type="checkbox"/> 2 (51-100)<br>4 <input type="checkbox"/> 3 (101-250)<br>5 <input type="checkbox"/> 4+ (>250)<br><br>1 <input type="checkbox"/> Haze<br>1 <input type="checkbox"/> Trace<br>2 <input type="checkbox"/> 1 (few opacities, mild blurring)<br>3 <input type="checkbox"/> 2 (significant blurring, still visible)<br>4 <input type="checkbox"/> 3 (Optic nerve visible, no vessels seen)<br>5 <input type="checkbox"/> 4+ (dense opacity obscures optic nerve head)<br><br>1 <input type="checkbox"/> PVD              1 <input type="checkbox"/> Clumping<br>1 <input type="checkbox"/> Syneresis        1 <input type="checkbox"/> Other:<br>_____ | 1 <input type="checkbox"/> Clear<br>1 <input type="checkbox"/> No view                                                                                           | 1 <input type="checkbox"/> Cells<br>1 <input type="checkbox"/> Trace (2-20)<br>2 <input type="checkbox"/> 1 (21-50)<br>3 <input type="checkbox"/> 2 (51-100)<br>4 <input type="checkbox"/> 3 (101-250)<br>5 <input type="checkbox"/> 4+ (>250)<br><br>1 <input type="checkbox"/> Haze<br>1 <input type="checkbox"/> Trace<br>2 <input type="checkbox"/> 1 (few opacities, mild blurring)<br>3 <input type="checkbox"/> 2 (significant blurring, still visible)<br>4 <input type="checkbox"/> 3 (Optic nerve visible, no vessels seen)<br>5 <input type="checkbox"/> 4+ (dense opacity obscures optic nerve head)<br><br>1 <input type="checkbox"/> PVD              1 <input type="checkbox"/> Clumping<br>1 <input type="checkbox"/> Syneresis        1 <input type="checkbox"/> Other:<br>_____ |
| 8. Optic nerve | 1 <input type="checkbox"/> Sharp/pink<br>Cup to disk ratio: <input type="text"/> <input type="text"/> <input type="text"/><br>1 <input type="checkbox"/> No view | 1 <input type="checkbox"/> Swollen              1 <input type="checkbox"/> Gliosis<br>1 <input type="checkbox"/> Pale<br>1 <input type="checkbox"/> Cupped                1 <input type="checkbox"/> Other:<br>_____                                                                                                                                                                                                                                                                                                                                                                                                                                                                                                                                                                              | 1 <input type="checkbox"/> Sharp/pink<br>Cup to disk ratio: <input type="text"/> <input type="text"/> <input type="text"/><br>1 <input type="checkbox"/> No view | 1 <input type="checkbox"/> Swollen              1 <input type="checkbox"/> Gliosis<br>1 <input type="checkbox"/> Pale<br>1 <input type="checkbox"/> Cupped                1 <input type="checkbox"/> Other:<br>_____                                                                                                                                                                                                                                                                                                                                                                                                                                                                                                                                                                              |
| 9. Macula      | 1 <input type="checkbox"/> Normal<br>1 <input type="checkbox"/> No view                                                                                          | 1 <input type="checkbox"/> Hemorrhage        1 <input type="checkbox"/> CWS<br>1 <input type="checkbox"/> Edema                1 <input type="checkbox"/> Vascular sheathing<br>1 <input type="checkbox"/> ERM<br>1 <input type="checkbox"/> Scar                    1 <input type="checkbox"/> Other:<br>_____                                                                                                                                                                                                                                                                                                                                                                                                                                                                                   | 1 <input type="checkbox"/> Normal<br>1 <input type="checkbox"/> No view                                                                                          | 1 <input type="checkbox"/> Hemorrhage        1 <input type="checkbox"/> CWS<br>1 <input type="checkbox"/> Edema                1 <input type="checkbox"/> Vascular sheathing<br>1 <input type="checkbox"/> ERM<br>1 <input type="checkbox"/> Scar                    1 <input type="checkbox"/> Other:<br>_____                                                                                                                                                                                                                                                                                                                                                                                                                                                                                   |
| 10. Periphery  | 1 <input type="checkbox"/> Attached<br>1 <input type="checkbox"/> No view                                                                                        | 1 <input type="checkbox"/> Hemorrhage        1 <input type="checkbox"/> Detachment<br>1 <input type="checkbox"/> Scar                    1 <input type="checkbox"/> Other:<br>_____                                                                                                                                                                                                                                                                                                                                                                                                                                                                                                                                                                                                               | 1 <input type="checkbox"/> Attached<br>1 <input type="checkbox"/> No view                                                                                        | 1 <input type="checkbox"/> Hemorrhage        1 <input type="checkbox"/> Detachment<br>1 <input type="checkbox"/> Scar                    1 <input type="checkbox"/> Other:<br>_____                                                                                                                                                                                                                                                                                                                                                                                                                                                                                                                                                                                                               |

# Follow-up Ophthalmic Evaluation at JFK



Attach a PID label here:

Timepoint:

- 1  Year 1      4  Year 4  
 2  Year 2      5  Year 5  
 3  Year 3

11. Assessment - Mark all that apply:

- |                             | Eyes affected              |                            |
|-----------------------------|----------------------------|----------------------------|
|                             | OD                         | OS                         |
| a. Uveitis                  | 1 <input type="checkbox"/> | 1 <input type="checkbox"/> |
| b. Retinal scar             | 1 <input type="checkbox"/> | 1 <input type="checkbox"/> |
| c. Cataract                 | 1 <input type="checkbox"/> | 1 <input type="checkbox"/> |
| d. Pseudophakia             | 1 <input type="checkbox"/> | 1 <input type="checkbox"/> |
| e. Macular edema            | 1 <input type="checkbox"/> | 1 <input type="checkbox"/> |
| f. UV sun damage            | 1 <input type="checkbox"/> | 1 <input type="checkbox"/> |
| g. Hypertensive retinopathy | 1 <input type="checkbox"/> | 1 <input type="checkbox"/> |
| h. Retinal detachment       | 1 <input type="checkbox"/> | 1 <input type="checkbox"/> |
| i. Glaucoma                 | 1 <input type="checkbox"/> | 1 <input type="checkbox"/> |
| j. Dry eye                  | 1 <input type="checkbox"/> |                            |
| k. Presbyopia               | 1 <input type="checkbox"/> |                            |
| l. Ocular allergy           | 1 <input type="checkbox"/> |                            |

12. If present, uveitis is:  
 1  Active    2  Inactive    3  Unclear

13. If present, retinal scar:  
 1  Stable    2  Increasing    3  Unclear

- |                          | Eyes affected              |                            |                            |
|--------------------------|----------------------------|----------------------------|----------------------------|
|                          | N/A                        | OD                         | OS                         |
| k. Other; specify: _____ | 1 <input type="checkbox"/> | 1 <input type="checkbox"/> | 1 <input type="checkbox"/> |
| l. Other; specify: _____ | 1 <input type="checkbox"/> | 1 <input type="checkbox"/> | 1 <input type="checkbox"/> |
| m. Other; specify: _____ | 1 <input type="checkbox"/> | 1 <input type="checkbox"/> | 1 <input type="checkbox"/> |
| n. Other; specify: _____ | 1 <input type="checkbox"/> | 1 <input type="checkbox"/> | 1 <input type="checkbox"/> |

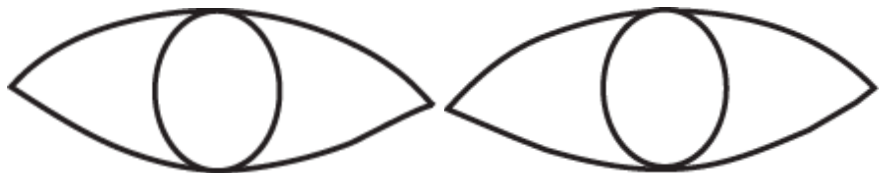

13. Plan (Mark all that apply)

- 1  Prednisolone acetate  
 1  Artificial tears  
 1  Reading glasses  
 1  Custom glasses  
 1  Surgical consideration

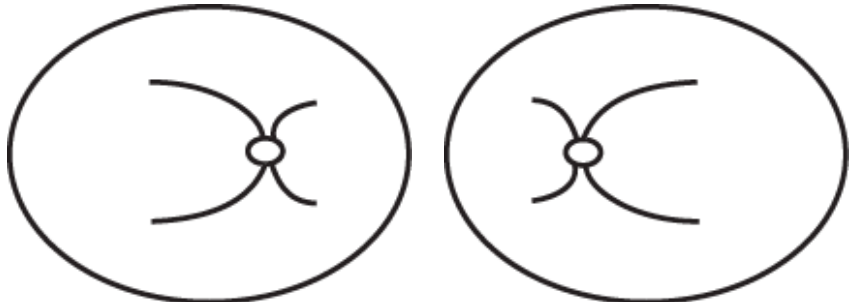

14. Will the volunteer be scheduled for interim clinical follow-up?

- 0  No    1  Yes

D. Assessment and plan:

E. Follow-up (Mark only one):

- 1  1 year  
 2  As needed

F. Notes:

Initials of providers:

Signature: \_\_\_\_\_ Date: \_\_\_\_\_

# Semen Collection



Attach a PID label here:

Date Form Completed:

(example: 01-SEP-2015)

|                      |                      |                      |                      |                      |                      |
|----------------------|----------------------|----------------------|----------------------|----------------------|----------------------|
| <input type="text"/> |
| Day                  |                      | Month                |                      | Year                 |                      |

Participant Initials: \_\_\_\_\_

Complete this form each time a male survivor aged 18 and older attempts to provide a sample.

1. Collection site:

- 1  Duport Road Clinic      3  Rennie Hospital  
2  JFK Hospital      4  Mobile unit

2. Was a semen sample successfully obtained?

0  No → **Sign form and submit.**

1  Yes →

3. Date of specimen:  
(example: 01-SEP-2015)

|                      |                      |                      |                      |                      |                      |
|----------------------|----------------------|----------------------|----------------------|----------------------|----------------------|
| <input type="text"/> |
| Day                  |                      | Month                |                      | Year                 |                      |

4. Apply specimen label below:

Signature: \_\_\_\_\_ Date: \_\_\_\_\_

# Death

Attach a PID label here:

**Date of Death:**

(example: 01-SEP-2015)

|                      |                      |                      |                      |                      |                      |                      |                      |
|----------------------|----------------------|----------------------|----------------------|----------------------|----------------------|----------------------|----------------------|
| <input type="text"/> |
| Day                  |                      | Month                |                      | Year                 |                      |                      |                      |

**Participants initials:** \_\_\_\_\_

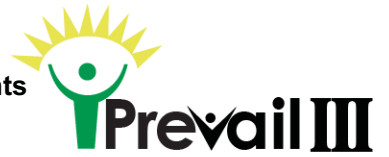

**Site:**

1. What is the reported cause of death?

- Enter only one cause (medical condition)
- Be as specific as possible
- DO NOT abbreviate
- DO NOT enter terminal events such as cardiac arrest, respiratory arrest, or ventricular fibrillation, without showing the etiology

2. Was the death certificate obtained?

- 0  No  
1  Yes

3. Provide a brief summary of events reported prior to death:

The PREVAIL Site Physician must sign and date this CRF.

Site physician signature: \_\_\_\_\_

Print name: \_\_\_\_\_

(example: 01-SEP-2015)

Date signed: 

|                      |                      |                      |                      |                      |                      |                      |                      |
|----------------------|----------------------|----------------------|----------------------|----------------------|----------------------|----------------------|----------------------|
| <input type="text"/> |
| Day                  |                      | Month                |                      | Year                 |                      |                      |                      |

Clinic name: \_\_\_\_\_



## 5 REFERENCES

---

<sup>1</sup> Kennedy SB, Bolay F, Kieh M, et al. Phase 2 Placebo-Controlled Trial of Two Vaccines to Prevent Ebola in Liberia. *N Engl J Med* 2017;377:1438-47.

<sup>2</sup> The PREVAIL II Writing Group, for the Multi-National PREVAIL II Study Team. A randomized, controlled trial of ZMapp for Ebola virus infection. *N Engl J Med*. 2016; 375:1448-1456.

<sup>3</sup> Standardization of Uveitis Nomenclature (SUN) Working Group. Standardization of Uveitis Nomenclature for Reporting Clinical Data. Results of the First International Workshop. *Am J Ophthalmol*. 2005; 140(3): 509-516.

<sup>4</sup>WHO Global Data on Visual Impairments 2010. (Accessed March 6, 2017 at <http://www.who.int/blindness/GLOBALDATAFINALforweb.pdf> )

<sup>5</sup> Pettit J, Fallah M, Nason M, et al. Assessment and optimization of the GeneXpert diagnostic platform for detection of Ebola virus RNA in seminal fluid, *J Infect Dis*. 2017; 215(4):547-553.

<sup>6</sup>Mattia JG, Vandy MJ, Chang JC, et al. Early clinical sequelae of Ebola virus disease in Sierra Leone: a cross-sectional study. *Lancet Infect Dis* 2015.

<sup>7</sup>Levey AS, Stevens LA, Schmid CH, et al CKD-EPI (Chronic Kidney Disease Epidemiology Collaboration). A new equation to estimate glomerular filtration rate. *Ann Intern Med*. 2009;150(9):604.

<sup>8</sup>Schwartz GJ and Work DF. Measurement and estimation of GFR in children and adolescents. *J Am Soc Nephrol*. 2009; Nov; 4(11): 1832-643.

<sup>9</sup>Wai CT, Greenson JK, Fontana RJ, Kalbfleisch JD, Marrero JA, Conjeevaram HS, Lok AS. A simple noninvasive index can predict both significant fibrosis and cirrhosis in patients with chronic hepatitis C. *Hepatology*. 2003;38(2):518.
